# Supplementary material for: Structure and solvation dynamics of the hydroxide ion in ice-like water clusters: a CCSD(T) and car–parrinello molecular dynamics study
Source: Royal Society of Chemistry journal article supplement (doi:10.1039/d1cp02524d), 2021-01-01
Supplement: d1cp02524d2.pdf [file d1cp02524d2.pdf]

## **Supporting Information I**

(xyz coordinates, Å)

### **Structure and Solvation Dynamics of the Hydroxide Ion in Ice-like Water Clusters: a CCSD(T) and Car-Parrinello Molecular Dynamics Study**

Kono H. Lemke\*

\*Department of Earth Sciences, University of Hong Kong, Pokfulam Road, Hong Kong, SAR,\*e-mail: kono@hku.hk

## MP2/aVDZ optimized geometries

OH(H<sub>2</sub>O)<sub>8</sub>

## 8w-I

|   |              |              |              |
|---|--------------|--------------|--------------|
| 8 | -1.100999000 | -2.138004000 | 0.721406000  |
| 8 | 0.760396000  | -2.725423000 | -1.287536000 |
| 8 | 1.442893000  | -4.375298000 | 0.561307000  |
| 8 | -1.449796000 | -3.557649000 | -2.322776000 |
| 8 | -1.221187000 | -5.266364000 | -0.029620000 |
| 8 | 2.425544000  | -6.589451000 | -0.997863000 |
| 8 | 2.060157000  | -4.550964000 | -2.995535000 |
| 8 | -0.309611000 | -5.687655000 | -3.926734000 |
| 8 | -0.202962000 | -7.439420000 | -1.688840000 |
| 1 | -0.420127000 | -2.253933000 | 0.014439000  |
| 1 | 1.415703000  | -3.903706000 | 1.403053000  |
| 1 | 1.287470000  | -3.650333000 | -0.140048000 |
| 1 | -0.578476000 | -3.131363000 | -2.011319000 |
| 1 | 1.238726000  | -1.921374000 | -1.530183000 |
| 1 | -1.372805000 | -4.728351000 | -0.835418000 |
| 1 | -0.306506000 | -5.026530000 | 0.228722000  |
| 1 | 2.331535000  | -5.255257000 | -2.370371000 |
| 1 | 0.576506000  | -5.301034000 | -3.731200000 |
| 1 | -0.668068000 | -6.857546000 | -1.056355000 |
| 1 | 2.206840000  | -5.940526000 | -0.304224000 |
| 1 | 1.555418000  | -6.996263000 | -1.205538000 |
| 1 | 1.641502000  | -3.877981000 | -2.406393000 |
| 1 | -0.284347000 | -6.936321000 | -2.529436000 |
| 1 | -0.900958000 | -4.997817000 | -3.576071000 |
| 1 | -2.119710000 | -2.891231000 | -2.124904000 |
| 1 | -1.446736000 | -3.038459000 | 0.815798000  |

## 8w-II

|   |              |              |              |
|---|--------------|--------------|--------------|
| 8 | -1.161487000 | -2.605437000 | 0.748111000  |
| 8 | 0.750546000  | -2.566138000 | -1.298123000 |
| 8 | 1.776969000  | -4.253384000 | 0.346363000  |
| 8 | 0.986967000  | -0.211008000 | -0.274626000 |
| 8 | 3.405475000  | -2.264771000 | -2.194021000 |
| 8 | 4.591584000  | -3.806649000 | -0.074852000 |
| 8 | 4.563765000  | -1.382378000 | 1.417729000  |
| 8 | 1.736176000  | -1.869278000 | 1.943810000  |
| 8 | 3.805688000  | 0.148234000  | -0.855729000 |
| 1 | -0.556428000 | -2.614615000 | -0.033348000 |
| 1 | 0.092493000  | 0.111510000  | -0.107361000 |
| 1 | 0.843766000  | -1.077628000 | -0.790669000 |
| 1 | 1.341784000  | -3.693135000 | -0.387495000 |
| 1 | 0.329055000  | -2.784654000 | -2.140004000 |
| 1 | 1.786965000  | -2.723188000 | 1.465062000  |
| 1 | 1.499677000  | -1.231979000 | 1.236940000  |
| 1 | 3.667663000  | -1.501137000 | 1.789037000  |
| 1 | 2.867838000  | 0.309534000  | -0.648540000 |
| 1 | 2.464125000  | -2.392062000 | -1.924101000 |
| 1 | 3.710095000  | -4.149832000 | 0.160284000  |
| 1 | 1.069224000  | -4.830930000 | 0.658140000  |
| 1 | -0.554196000 | -2.379471000 | 1.468795000  |
| 1 | 3.742130000  | -0.648137000 | -1.434276000 |
| 1 | 3.893162000  | -2.858832000 | -1.585870000 |
| 1 | 4.682289000  | -3.012887000 | 0.497462000  |
| 1 | 4.395934000  | -0.770435000 | 0.666900000  |

## 8w-III

|   |              |              |              |
|---|--------------|--------------|--------------|
| 8 | -0.730718000 | -2.192793000 | 0.926827000  |
| 8 | 0.786798000  | -2.721523000 | -1.349864000 |
| 8 | 1.448644000  | -4.335166000 | 0.572387000  |
| 8 | -1.522595000 | -3.672060000 | -2.318247000 |
| 8 | -1.213993000 | -5.338177000 | -0.096644000 |
| 8 | 2.396271000  | -6.542885000 | -0.960951000 |
| 8 | 1.932013000  | -4.555211000 | -2.953911000 |
| 8 | -0.188518000 | -5.693666000 | -4.010370000 |
| 8 | -0.216197000 | -7.457952000 | -1.683986000 |
| 1 | -0.235315000 | -2.287673000 | 0.074129000  |
| 1 | 1.153369000  | -3.851679000 | 1.356846000  |
| 1 | 1.311734000  | -3.651177000 | -0.166155000 |
| 1 | -0.684469000 | -3.190762000 | -2.070694000 |
| 1 | 1.236478000  | -1.888280000 | -1.545869000 |
| 1 | -1.420010000 | -4.753231000 | -0.864231000 |
| 1 | -0.319332000 | -5.044063000 | 0.169995000  |
| 1 | 2.244198000  | -5.226718000 | -2.309442000 |
| 1 | 0.657974000  | -5.260240000 | -3.677031000 |
| 1 | -0.674323000 | -6.821987000 | -1.090626000 |

|   |              |              |              |
|---|--------------|--------------|--------------|
| 1 | 2.167270000  | -5.912581000 | -0.251939000 |
| 1 | 1.538316000  | -6.974998000 | -1.162946000 |
| 1 | 1.548271000  | -3.830135000 | -2.376803000 |
| 1 | -0.277898000 | -7.018717000 | -2.552396000 |
| 1 | -0.052170000 | -5.813927000 | -4.957021000 |
| 1 | -1.237846000 | -4.275984000 | -3.025981000 |
| 1 | -1.385874000 | -2.902355000 | 0.862376000  |

## 8w-IV

|   |              |              |              |
|---|--------------|--------------|--------------|
| 8 | -1.054405000 | -2.991487000 | 0.654612000  |
| 8 | 0.805075000  | -2.517150000 | -1.366323000 |
| 8 | 1.728443000  | -4.260645000 | 0.320232000  |
| 8 | 1.080789000  | -0.141160000 | -0.161025000 |
| 8 | 3.384782000  | -2.189083000 | -2.062579000 |
| 8 | 3.923960000  | 0.116588000  | -0.921476000 |
| 8 | 1.802764000  | -1.831147000 | 1.943485000  |
| 8 | 4.562924000  | -1.396280000 | 1.492455000  |
| 8 | 4.523987000  | -3.823798000 | -0.021157000 |
| 1 | -0.473674000 | -2.764333000 | -0.115220000 |
| 1 | 0.902871000  | -0.937000000 | -0.320232000 |
| 1 | 1.364032000  | -3.678424000 | -0.428251000 |
| 1 | 0.341387000  | -2.738398000 | -2.185453000 |
| 1 | 1.799083000  | -2.674650000 | 1.447000000  |
| 1 | 1.507371000  | -1.175123000 | 1.268078000  |
| 1 | 3.631766000  | -1.492005000 | 1.792689000  |
| 1 | 2.412047000  | -2.330015000 | -1.862660000 |
| 1 | 3.642862000  | -4.164642000 | 0.223522000  |
| 1 | 0.919564000  | -4.600576000 | 0.728215000  |
| 1 | -0.679025000 | -2.446830000 | 1.361230000  |
| 1 | 3.758771000  | -0.742480000 | -1.421698000 |
| 1 | 3.839599000  | -2.834648000 | -1.479380000 |
| 1 | 4.635440000  | -3.046271000 | 0.567599000  |
| 1 | 4.481776000  | -0.771497000 | 0.748126000  |
| 1 | 1.960220000  | 0.157315000  | -0.451168000 |
| 1 | 4.424409000  | 0.669656000  | -1.532098000 |

## 8w-V

|   |              |              |              |
|---|--------------|--------------|--------------|
| 8 | -2.087905000 | -0.004021000 | -0.009599000 |
| 1 | -1.504416000 | -1.111064000 | -1.101590000 |
| 8 | -1.077725000 | -1.768217000 | -1.728830000 |
| 1 | -1.009195000 | -1.269755000 | -2.554100000 |
| 1 | 0.759399000  | -1.829835000 | -1.210143000 |
| 8 | 1.715908000  | -1.702239000 | -1.045778000 |
| 1 | 1.773092000  | -1.563784000 | -0.074317000 |
| 1 | -1.518997000 | 1.105640000  | 1.087331000  |
| 1 | -1.514783000 | -1.097906000 | 1.101267000  |
| 1 | -1.508231000 | 1.092593000  | -1.114540000 |
| 8 | -1.100263000 | 1.764546000  | 1.718060000  |
| 8 | -1.093802000 | -1.726692000 | 1.760552000  |
| 8 | -1.083405000 | 1.723535000  | -1.769269000 |
| 1 | -1.037323000 | 1.266677000  | 2.544134000  |
| 1 | -1.023739000 | -2.551541000 | 1.261589000  |
| 1 | -1.020156000 | 2.547869000  | -1.268533000 |
| 1 | 0.741486000  | 1.832358000  | 1.216531000  |
| 1 | 0.744270000  | -1.212538000 | 1.834539000  |
| 1 | 0.756870000  | 1.215123000  | -1.827456000 |
| 8 | 1.699939000  | 1.708107000  | 1.061206000  |
| 8 | 1.702010000  | -1.050734000 | 1.713069000  |
| 8 | 1.714056000  | 1.056525000  | -1.697653000 |
| 1 | 1.766779000  | 1.569837000  | 0.090336000  |
| 1 | 1.762697000  | -0.079440000 | 1.574963000  |
| 1 | 1.776842000  | 0.085441000  | -1.558961000 |
| 1 | -3.055105000 | -0.006147000 | -0.015117000 |

OH(H<sub>2</sub>O)<sub>9</sub>

## 9w-I

|   |              |              |              |
|---|--------------|--------------|--------------|
| 8 | -0.664670000 | -1.906441000 | 0.791847000  |
| 8 | 0.589966000  | -2.816735000 | -1.393356000 |
| 8 | 1.016661000  | -5.075501000 | -0.096330000 |
| 8 | 2.244855000  | -1.151919000 | -0.098970000 |
| 8 | 2.720347000  | -3.432059000 | 1.486648000  |
| 8 | 4.610868000  | -1.876739000 | -1.677045000 |
| 8 | 2.825229000  | -3.473048000 | -2.757383000 |
| 8 | 3.489221000  | -5.831220000 | -1.330477000 |
| 8 | 5.162513000  | -4.053546000 | 0.198566000  |
| 1 | -0.260752000 | -2.258597000 | -0.057256000 |
| 1 | 3.084443000  | -1.133039000 | -0.591217000 |
| 1 | 1.633314000  | -1.658290000 | -0.702526000 |

|   |              |              |              |
|---|--------------|--------------|--------------|
| 1 | 0.739763000  | -4.285410000 | -0.653507000 |
| 1 | -0.044806000 | -2.670708000 | -2.108230000 |
| 1 | 2.224570000  | -4.046992000 | 0.902374000  |
| 1 | 2.562592000  | -2.564138000 | 1.047295000  |
| 1 | 3.048180000  | -4.362115000 | -2.404076000 |
| 1 | 4.132355000  | -5.341126000 | -0.775871000 |
| 1 | 4.416792000  | -3.821145000 | 0.793270000  |
| 1 | 5.126878000  | -1.458233000 | -2.375750000 |
| 1 | 3.955320000  | -2.472536000 | -2.158458000 |
| 1 | 1.968877000  | -3.241977000 | -2.293620000 |
| 1 | 5.174303000  | -3.300912000 | -0.421212000 |
| 1 | 2.658042000  | -5.779760000 | -0.819916000 |
| 1 | 0.434702000  | -5.034690000 | 0.685054000  |
| 1 | -0.039445000 | -1.208205000 | 1.034114000  |
| 8 | -0.089140000 | -4.100395000 | 2.449706000  |
| 1 | 0.853910000  | -3.891541000 | 2.560849000  |
| 1 | -0.400738000 | -3.315696000 | 1.944098000  |

**9w-II**

|   |              |              |              |
|---|--------------|--------------|--------------|
| 8 | -0.621197000 | -1.924267000 | 0.857221000  |
| 8 | 0.530578000  | -2.844053000 | -1.358999000 |
| 8 | 1.038365000  | -5.060750000 | -0.096933000 |
| 8 | 2.250082000  | -1.163508000 | -0.140274000 |
| 8 | 2.759272000  | -3.458015000 | -2.860322000 |
| 8 | 4.611571000  | -1.810063000 | -1.630153000 |
| 8 | -0.019841000 | -4.106028000 | 2.490082000  |
| 8 | 2.781218000  | -3.414039000 | 1.343855000  |
| 8 | 5.135272000  | -4.056308000 | 0.267591000  |
| 8 | 3.455917000  | -5.872846000 | -1.365473000 |
| 1 | -0.258260000 | -2.275079000 | -0.014318000 |
| 1 | 3.090322000  | -1.184847000 | -0.645039000 |
| 1 | 1.616910000  | -1.656361000 | -0.728384000 |
| 1 | 0.730660000  | -4.270530000 | -0.654060000 |
| 1 | -0.116740000 | -2.734475000 | -2.068982000 |
| 1 | 2.217457000  | -4.030892000 | 0.819513000  |
| 1 | 2.586857000  | -2.539558000 | 0.916454000  |
| 1 | 3.000082000  | -4.342867000 | -2.523132000 |
| 1 | 4.306623000  | -3.801501000 | 0.763760000  |
| 1 | 4.010780000  | -2.374645000 | -2.175292000 |
| 1 | 1.933286000  | -3.239378000 | -2.353621000 |
| 1 | 2.623936000  | -5.778307000 | -0.860581000 |
| 1 | 0.454395000  | -5.051483000 | 0.682995000  |
| 1 | 0.008483000  | -1.218496000 | 1.063858000  |
| 1 | 0.925170000  | -3.909430000 | 2.592246000  |
| 1 | -0.327462000 | -3.316604000 | 1.985647000  |
| 1 | 5.008439000  | -2.460445000 | -1.025854000 |
| 1 | 4.109176000  | -5.397554000 | -0.821323000 |
| 1 | 5.774293000  | -4.287908000 | 0.951579000  |

**9w-III**

|   |              |              |              |
|---|--------------|--------------|--------------|
| 8 | -0.881524000 | -1.490512000 | 0.512105000  |
| 8 | 0.725586000  | -2.648574000 | -1.216338000 |
| 8 | 1.418576000  | -4.445958000 | 0.629617000  |
| 8 | -1.494173000 | -3.644997000 | -2.112106000 |
| 8 | -0.919940000 | -3.720195000 | 2.264348000  |
| 8 | -1.110539000 | -5.575438000 | -0.069182000 |
| 8 | 2.449369000  | -6.597736000 | -1.029958000 |
| 8 | 2.022179000  | -4.511697000 | -2.929487000 |
| 8 | -0.327921000 | -5.620184000 | -3.937153000 |
| 8 | -0.092052000 | -7.586050000 | -1.883828000 |
| 1 | -0.224896000 | -1.883723000 | -0.154315000 |
| 1 | 0.907132000  | -4.152618000 | 1.406489000  |
| 1 | 1.297503000  | -3.704919000 | -0.029421000 |
| 1 | -0.624813000 | -3.183350000 | -1.856854000 |
| 1 | 1.233955000  | -1.946310000 | -1.645382000 |
| 1 | -1.376154000 | -4.948370000 | -0.776769000 |
| 1 | -0.181552000 | -5.308175000 | 0.101771000  |
| 1 | 2.315203000  | -5.232142000 | -2.331480000 |
| 1 | 0.551486000  | -5.233091000 | -3.715673000 |
| 1 | -0.584355000 | -7.079542000 | -1.208775000 |
| 1 | 2.177735000  | -6.010119000 | -0.301068000 |
| 1 | 1.615945000  | -7.047727000 | -1.290442000 |
| 1 | 1.591281000  | -3.873630000 | -2.315827000 |
| 1 | -0.205572000 | -7.019540000 | -2.678291000 |
| 1 | -0.930603000 | -4.986315000 | -3.509447000 |
| 1 | -2.172471000 | -2.983382000 | -1.926765000 |
| 1 | -1.284130000 | -4.400667000 | 1.670377000  |
| 1 | -0.996558000 | -2.904399000 | 1.724378000  |
| 1 | -0.402147000 | -0.752248000 | 0.907856000  |

**9w-IV**

|   |              |              |              |
|---|--------------|--------------|--------------|
| 1 | -0.020659000 | -0.042941000 | 2.504260000  |
| 8 | -0.091938000 | -0.102022000 | 1.539790000  |
| 8 | -2.219661000 | -1.421001000 | 0.852760000  |
| 1 | -1.400267000 | -0.917260000 | 1.207980000  |
| 1 | -2.682266000 | -1.737757000 | 1.637230000  |
| 8 | 0.011970000  | -0.009921000 | -1.375230000 |
| 1 | 0.080749000  | 0.093160000  | -0.405470000 |
| 1 | -0.173267000 | -0.975403000 | -1.457250000 |
| 8 | -1.444580000 | 2.235500000  | 0.873890000  |
| 1 | -2.110605000 | 1.854871000  | 0.268730000  |
| 1 | -0.979699000 | 1.425576000  | 1.205140000  |
| 8 | 2.224991000  | 1.407289000  | 0.968720000  |
| 1 | 1.436558000  | 0.885899000  | 1.251550000  |
| 1 | 1.823222000  | 2.085694000  | 0.389000000  |
| 8 | -2.873288000 | 0.601060000  | -1.058630000 |
| 1 | -1.981926000 | 0.495873000  | -1.440660000 |
| 1 | -2.886888000 | -0.133620000 | -0.413750000 |
| 8 | 0.609021000  | 2.938348000  | -0.873070000 |
| 1 | -0.164088000 | 2.820857000  | -0.271470000 |
| 1 | 0.518351000  | 2.179346000  | -1.470320000 |
| 8 | 3.014357000  | -0.517300000 | -0.893350000 |
| 1 | 2.206886000  | -0.401471000 | -1.421410000 |
| 1 | 2.907108000  | 0.203189000  | -0.229640000 |
| 8 | -0.534353000 | -2.733998000 | -1.076990000 |
| 1 | 0.222908000  | -2.771248000 | -0.446450000 |
| 1 | -1.275136000 | -2.521108000 | -0.478130000 |
| 8 | 1.474701000  | -2.294231000 | 0.807580000  |
| 1 | 2.160155000  | -1.837012000 | 0.279920000  |
| 1 | 0.949091000  | -1.536448000 | 1.167020000  |

**9w-V**

|   |              |              |              |
|---|--------------|--------------|--------------|
| 8 | -0.950691000 | -1.615353000 | 0.577648000  |
| 8 | 0.659719000  | -2.671295000 | -1.214355000 |
| 8 | 0.937809000  | -4.519689000 | 0.568104000  |
| 8 | -1.463727000 | -3.557737000 | -2.587322000 |
| 8 | -1.439153000 | -5.574986000 | -0.560975000 |
| 8 | -3.182123000 | -3.175245000 | -0.223736000 |
| 8 | 2.312263000  | -6.590677000 | -0.934437000 |
| 8 | 2.111996000  | -4.483957000 | -2.859737000 |
| 8 | -0.087307000 | -5.624586000 | -4.148018000 |
| 8 | -0.071084000 | -7.607863000 | -2.104696000 |
| 1 | -2.827592000 | -4.072645000 | -0.090483000 |
| 1 | 0.931869000  | -3.747025000 | -0.096703000 |
| 1 | -0.660598000 | -3.118367000 | -2.190901000 |
| 1 | 1.330538000  | -2.003486000 | -1.413796000 |
| 1 | -1.399553000 | -5.005995000 | -1.360479000 |
| 1 | -0.648616000 | -5.278817000 | -0.060019000 |
| 1 | 2.332382000  | -5.211768000 | -2.240476000 |
| 1 | 0.750421000  | -5.220608000 | -3.822423000 |
| 1 | -0.660220000 | -7.114702000 | -1.501241000 |
| 1 | 1.929451000  | -6.005712000 | -0.255449000 |
| 1 | 1.528658000  | -7.052215000 | -1.307748000 |
| 1 | 1.606802000  | -3.856933000 | -2.293211000 |
| 1 | -0.094082000 | -7.037975000 | -2.905074000 |
| 1 | -0.748226000 | -4.988447000 | -3.820934000 |
| 1 | -2.200796000 | -3.229685000 | -2.039479000 |
| 1 | -2.475009000 | -2.608456000 | 0.152268000  |
| 1 | -0.312846000 | -1.963495000 | -0.130280000 |
| 1 | -1.087893000 | -0.690979000 | 0.336367000  |
| 1 | 0.839211000  | -4.094868000 | 1.429238000  |

**OH(H<sub>2</sub>O)<sub>10</sub>**

**10w-I**

|   |              |              |              |
|---|--------------|--------------|--------------|
| 8 | 0.069174000  | 0.800340000  | 0.683074000  |
| 8 | -0.897187000 | -1.715519000 | 0.644970000  |
| 8 | 0.426962000  | -3.491663000 | -1.239873000 |
| 1 | -0.215091000 | -0.153772000 | 0.717192000  |
| 1 | 0.681772000  | -2.752238000 | -1.818582000 |
| 1 | -1.710722000 | -1.599689000 | -0.079412000 |
| 1 | -0.363706000 | -2.363915000 | 0.145156000  |
| 1 | -0.444085000 | -3.724058000 | -1.616428000 |
| 1 | -0.338533000 | 1.188328000  | 1.466795000  |
| 8 | -3.067225000 | -1.286508000 | -0.945332000 |
| 8 | -2.171110000 | -3.275393000 | -2.404037000 |
| 8 | -1.509602000 | 0.725181000  | -1.712453000 |
| 1 | -0.952170000 | 0.966091000  | -0.947594000 |

|   |              |              |              |
|---|--------------|--------------|--------------|
| 1 | -2.161595000 | 0.065338000  | -1.334786000 |
| 1 | -2.628410000 | -2.609133000 | -1.801588000 |
| 1 | -3.770839000 | -1.311647000 | -0.282015000 |
| 8 | -0.276089000 | -1.323963000 | -3.201302000 |
| 1 | -0.949078000 | -2.005760000 | -2.980804000 |
| 1 | -0.585436000 | -0.549346000 | -2.678341000 |
| 8 | -4.484278000 | -0.644345000 | -3.157950000 |
| 8 | -1.600436000 | -0.690350000 | -5.627717000 |
| 8 | -3.706173000 | -2.564203000 | -4.769677000 |
| 8 | -2.828808000 | 1.431684000  | -4.124135000 |
| 1 | -4.036167000 | 0.164391000  | -3.492070000 |
| 1 | -4.078071000 | -1.833071000 | -4.182609000 |
| 1 | -0.999745000 | -0.918487000 | -4.885443000 |
| 1 | -2.287470000 | 1.395219000  | -3.310547000 |
| 1 | -2.367878000 | 0.814312000  | -4.730509000 |
| 1 | -3.997077000 | -0.852840000 | -2.309546000 |
| 1 | -2.724216000 | -3.304973000 | -3.205174000 |
| 1 | -4.472470000 | -2.935216000 | -5.222398000 |
| 1 | -2.302848000 | -1.360014000 | -5.537707000 |

#### 10w-II

|   |              |              |              |
|---|--------------|--------------|--------------|
| 8 | -2.897757000 | -0.937032000 | -1.102003000 |
| 8 | -0.356480000 | -0.451515000 | -1.829336000 |
| 8 | 0.532707000  | -2.256722000 | -0.253949000 |
| 8 | -0.659316000 | 1.614840000  | -0.208182000 |
| 8 | 2.372842000  | 0.387129000  | -1.879833000 |
| 8 | 3.291004000  | -1.474001000 | 0.092316000  |
| 8 | -0.162965000 | -0.352358000 | 1.709147000  |
| 8 | 2.097368000  | 2.447147000  | -0.005202000 |
| 8 | 2.618925000  | 0.518499000  | 2.008608000  |
| 8 | -2.929843000 | -0.876850000 | 1.819561000  |
| 1 | -1.968269000 | -0.707369000 | 1.934957000  |
| 1 | -1.946067000 | -0.803771000 | -1.392315000 |
| 1 | -1.614389000 | 1.803432000  | -0.181670000 |
| 1 | -0.562232000 | 0.941850000  | -0.944993000 |
| 1 | 0.183993000  | -1.625448000 | -0.984720000 |
| 1 | -0.369136000 | -0.524250000 | -2.793722000 |
| 1 | 0.083362000  | -1.090569000 | 1.109476000  |
| 1 | -0.311028000 | 0.396237000  | 1.083278000  |
| 1 | 2.807770000  | -0.276447000 | -1.303437000 |
| 1 | 3.155814000  | -0.831652000 | 0.823807000  |
| 1 | 1.696613000  | 0.226259000  | 2.136336000  |
| 1 | 1.122616000  | 2.435713000  | -0.001233000 |
| 1 | 2.291722000  | 1.817929000  | -0.737795000 |
| 1 | 1.431736000  | 0.097686000  | -1.879050000 |
| 1 | 2.511366000  | 1.270422000  | 1.383723000  |
| 1 | 2.429113000  | -1.926397000 | 0.032567000  |
| 1 | 0.017373000  | -3.066810000 | -0.346710000 |
| 1 | -3.283904000 | -0.000381000 | 1.601428000  |
| 8 | -3.558458000 | 1.454274000  | -0.116038000 |
| 1 | -4.222514000 | 1.926944000  | -0.631073000 |
| 1 | -3.401917000 | 0.599810000  | -0.610019000 |
| 1 | -2.836218000 | -1.250498000 | -0.179543000 |

#### 10w-III

|   |              |              |              |
|---|--------------|--------------|--------------|
| 8 | -3.528931000 | 1.454061000  | -0.236392000 |
| 8 | -2.910954000 | -1.028981000 | -1.006325000 |
| 8 | -0.334311000 | -0.697473000 | -1.767364000 |
| 8 | 0.517755000  | -2.308128000 | 0.038395000  |
| 8 | -0.636238000 | 1.534069000  | -0.394944000 |
| 8 | 2.337682000  | 0.252704000  | -1.898759000 |
| 8 | 3.287794000  | -1.422775000 | 0.098810000  |
| 8 | 2.052005000  | 2.502654000  | -0.151319000 |
| 8 | -0.157108000 | -0.182245000 | 1.751830000  |
| 8 | -2.916533000 | -0.657379000 | 1.842861000  |
| 8 | 2.638785000  | 0.647283000  | 1.940683000  |
| 1 | -3.392911000 | 0.561385000  | -0.665450000 |
| 1 | -1.956915000 | -0.472491000 | 1.953381000  |
| 1 | -1.956734000 | -0.949171000 | -1.305289000 |
| 1 | -2.840927000 | -1.192980000 | -0.045955000 |
| 1 | -0.554208000 | 0.775775000  | -1.047536000 |
| 1 | 0.189116000  | -1.774736000 | -0.772005000 |
| 1 | -0.367221000 | -0.888465000 | -2.714989000 |
| 1 | 0.088424000  | -0.986281000 | 1.240730000  |
| 1 | -0.291618000 | 0.488945000  | 1.038412000  |
| 1 | 1.712711000  | 0.381383000  | 2.097039000  |
| 1 | 2.307399000  | 1.972221000  | 0.634924000  |
| 1 | 1.400383000  | -0.052088000 | -1.882014000 |
| 1 | 2.970701000  | -0.085563000 | 1.375414000  |

|   |              |              |              |
|---|--------------|--------------|--------------|
| 1 | -1.589827000 | 1.732202000  | -0.362651000 |
| 1 | 1.084267000  | 2.387479000  | -0.191614000 |
| 1 | 3.078431000  | -0.855351000 | -0.681960000 |
| 1 | 2.308236000  | 1.101608000  | -1.408661000 |
| 1 | -4.127336000 | 1.931801000  | -0.822786000 |
| 1 | 2.467019000  | -1.941282000 | 0.183008000  |
| 1 | -0.054012000 | -3.083355000 | 0.079274000  |
| 1 | -3.274545000 | 0.198640000  | 1.558932000  |

#### 10w-IV

|   |              |              |              |
|---|--------------|--------------|--------------|
| 8 | -1.029712000 | -2.142852000 | 0.824944000  |
| 8 | 0.791547000  | -2.543919000 | -1.157844000 |
| 8 | 1.309777000  | -4.770414000 | 0.180354000  |
| 8 | 2.364940000  | -0.864739000 | -0.096003000 |
| 8 | 2.688184000  | -2.964918000 | 1.718566000  |
| 8 | 0.587187000  | -2.685153000 | 3.382226000  |
| 8 | 4.909710000  | -1.554319000 | -1.265302000 |
| 8 | 3.085126000  | -3.274083000 | -2.675695000 |
| 8 | 3.778303000  | -5.494500000 | -1.123409000 |
| 8 | 5.265215000  | -3.749426000 | 0.523609000  |
| 1 | 1.428305000  | -2.771536000 | 2.858892000  |
| 1 | -0.359972000 | -2.254388000 | 0.092135000  |
| 1 | 1.890045000  | -0.058881000 | 0.139617000  |
| 1 | 1.681103000  | -1.446360000 | -0.611326000 |
| 1 | 1.016915000  | -4.036010000 | -0.433963000 |
| 1 | 0.267344000  | -2.372285000 | -1.952368000 |
| 1 | 2.253395000  | -3.669786000 | 1.171436000  |
| 1 | 2.619732000  | -2.164247000 | 1.149640000  |
| 1 | 3.761246000  | -2.647383000 | -2.343786000 |
| 1 | 3.576477000  | -4.798621000 | -1.790976000 |
| 1 | 4.535302000  | -3.506096000 | 1.121969000  |
| 1 | 4.133754000  | -1.141044000 | -0.842680000 |
| 1 | 5.152713000  | -2.268500000 | -0.632694000 |
| 1 | 2.278400000  | -3.020199000 | -2.169673000 |
| 1 | 4.845847000  | -4.442402000 | -0.036360000 |
| 1 | 2.937448000  | -5.533790000 | -0.631249000 |
| 1 | 0.518642000  | -4.962049000 | 0.723607000  |
| 1 | -0.497843000 | -1.945959000 | 1.612634000  |
| 1 | 0.870723000  | -2.394623000 | 4.256794000  |
| 8 | -0.982767000 | -4.741373000 | 1.921933000  |
| 1 | -0.508696000 | -4.359723000 | 2.680398000  |
| 1 | -1.228137000 | -3.919639000 | 1.441969000  |

#### 10w-V

|   |              |              |              |
|---|--------------|--------------|--------------|
| 8 | -0.893233000 | -1.739503000 | 0.655930000  |
| 8 | 0.644742000  | -2.639351000 | -1.143048000 |
| 8 | 1.259817000  | -4.749475000 | 0.402408000  |
| 8 | 2.338334000  | -0.795490000 | -0.208476000 |
| 8 | 3.005112000  | -3.435213000 | -2.562068000 |
| 8 | 3.806340000  | -5.493153000 | -0.853133000 |
| 8 | 2.886493000  | -2.783259000 | 1.696732000  |
| 8 | 4.829652000  | -1.557780000 | -1.443044000 |
| 8 | 5.417419000  | -3.567903000 | 0.493103000  |
| 8 | 0.196540000  | -3.284921000 | 2.796051000  |
| 1 | 1.123155000  | -2.998512000 | 2.689188000  |
| 1 | -0.315313000 | -2.121024000 | -0.132278000 |
| 1 | 1.775973000  | -0.132935000 | 0.233942000  |
| 1 | 1.688916000  | -1.394101000 | -0.676432000 |
| 1 | 0.946089000  | -4.065350000 | -0.252609000 |
| 1 | 0.184305000  | -2.621613000 | -1.993939000 |
| 1 | 2.488234000  | -3.525913000 | 1.193490000  |
| 1 | 2.750019000  | -2.022150000 | 1.087031000  |
| 1 | 3.670822000  | -2.757020000 | -2.315875000 |
| 1 | 3.555241000  | -4.856122000 | -1.561710000 |
| 1 | 4.715673000  | -3.276604000 | 1.106166000  |
| 1 | 4.099528000  | -1.095442000 | -0.991288000 |
| 1 | 5.147766000  | -2.197953000 | -0.769188000 |
| 1 | 2.203689000  | -3.152883000 | -2.069248000 |
| 1 | 4.979716000  | -4.322706000 | 0.041020000  |
| 1 | 2.994124000  | -5.514440000 | -0.316935000 |
| 1 | 0.699106000  | -4.601234000 | 1.184271000  |
| 1 | -0.274427000 | -2.734024000 | 2.139199000  |
| 8 | 0.329654000  | 0.613822000  | 1.371132000  |
| 1 | 0.615876000  | 0.424026000  | 2.274273000  |
| 1 | -0.217073000 | -0.172597000 | 1.136551000  |
| 1 | -1.811909000 | -1.849712000 | 0.383507000  |

**OH(H<sub>2</sub>O)<sub>11</sub>****11w-I**

|   |              |              |              |
|---|--------------|--------------|--------------|
| 8 | 0.193896000  | -1.184367000 | -1.665043000 |
| 8 | 0.464125000  | 0.409355000  | 0.359161000  |
| 8 | 2.652671000  | -0.332762000 | -2.441472000 |
| 8 | 0.605990000  | -2.978264000 | -3.703066000 |
| 8 | 1.282461000  | -5.140576000 | -2.359635000 |
| 8 | 3.685233000  | -2.407811000 | -0.902480000 |
| 8 | 3.129930000  | -2.160621000 | -4.603643000 |
| 8 | 1.085522000  | -3.221131000 | -0.182456000 |
| 8 | 4.057059000  | -4.308934000 | -2.942662000 |
| 8 | 3.080405000  | 1.379691000  | -0.251182000 |
| 8 | 4.157436000  | -0.705441000 | 1.355609000  |
| 8 | 1.515880000  | -1.533938000 | 2.141618000  |
| 1 | -0.696263000 | -0.990092000 | -1.991471000 |
| 1 | -0.376441000 | 0.863286000  | 0.491246000  |
| 1 | 0.314190000  | -0.204352000 | -0.450952000 |
| 1 | 4.207621000  | -1.340815000 | 0.613041000  |
| 1 | 3.320397000  | -0.980861000 | 1.784747000  |
| 1 | 4.080612000  | -3.711502000 | -2.163443000 |
| 1 | 1.039492000  | -4.024088000 | -0.732476000 |
| 1 | 0.623287000  | -2.520972000 | -0.727169000 |
| 1 | 2.150619000  | 1.247060000  | 0.017587000  |
| 1 | 3.555208000  | 0.756668000  | 0.343011000  |
| 1 | 1.697805000  | -0.531399000 | -2.253823000 |
| 1 | 2.876553000  | 0.381846000  | -1.803450000 |
| 1 | 3.156646000  | -1.415201000 | -3.973336000 |
| 1 | 3.568569000  | -2.892006000 | -4.118875000 |
| 1 | 1.428396000  | -2.675156000 | -4.151388000 |
| 1 | 0.465905000  | -2.303666000 | -2.987370000 |
| 1 | 1.371948000  | -2.297375000 | 1.552679000  |
| 1 | 1.072491000  | -0.814924000 | 1.646997000  |
| 1 | 2.823458000  | -2.741325000 | -0.562763000 |
| 1 | 3.393182000  | -1.667046000 | -1.485926000 |
| 1 | 0.979776000  | -4.364650000 | -2.923650000 |
| 1 | 0.739827000  | -5.884809000 | -2.645382000 |
| 1 | 3.219305000  | -4.786434000 | -2.804888000 |

**11w-II**

|   |              |              |              |
|---|--------------|--------------|--------------|
| 8 | 0.131920000  | -0.779352000 | -1.498808000 |
| 8 | 1.587353000  | 1.408631000  | -1.559666000 |
| 8 | -2.045006000 | 0.867787000  | -1.473383000 |
| 8 | 2.485221000  | -2.053927000 | -1.128647000 |
| 8 | 2.391178000  | -2.493705000 | 1.458066000  |
| 8 | -0.082896000 | -0.985181000 | 1.125393000  |
| 8 | 1.465645000  | 1.322315000  | 1.220345000  |
| 8 | -2.355015000 | 0.824782000  | 1.290225000  |
| 8 | -0.718345000 | 3.089171000  | 1.290741000  |
| 8 | -0.535541000 | 3.387558000  | -1.360543000 |
| 8 | 3.919519000  | 0.004439000  | 1.696374000  |
| 8 | 4.182159000  | 0.216334000  | -1.157693000 |
| 1 | -0.193771000 | -1.332452000 | -2.222736000 |
| 1 | -1.657933000 | 1.748760000  | -1.615820000 |
| 1 | -1.254806000 | 0.260838000  | -1.504108000 |
| 1 | 0.122958000  | 2.598889000  | 1.420005000  |
| 1 | -1.382120000 | 2.365573000  | 1.388867000  |
| 1 | 3.108757000  | 0.556849000  | 1.684199000  |
| 1 | 0.581385000  | -1.642542000 | 1.400206000  |
| 1 | -0.693430000 | 4.306415000  | -1.605053000 |
| 1 | -0.625106000 | 3.361394000  | -0.364423000 |
| 1 | 1.020329000  | 0.585344000  | -1.684392000 |
| 1 | 0.981169000  | 2.156654000  | -1.705954000 |
| 1 | 3.430606000  | 0.802988000  | -1.366085000 |
| 1 | 4.211802000  | 0.215214000  | -0.177352000 |
| 1 | 3.154043000  | -1.346244000 | -1.256068000 |
| 1 | 1.616343000  | -1.590777000 | -1.307187000 |
| 1 | -1.705467000 | 0.122417000  | 1.478346000  |
| 1 | -2.385619000 | 0.809124000  | 0.304574000  |
| 1 | 0.895547000  | 0.517554000  | 1.282689000  |
| 1 | 1.581581000  | 1.404705000  | 0.243499000  |
| 1 | 2.459014000  | -2.397753000 | 0.456719000  |
| 1 | 2.600698000  | -3.418161000 | 1.635253000  |
| 1 | 3.550451000  | -0.895402000 | 1.762613000  |
| 1 | -0.077775000 | -1.033803000 | 0.121184000  |

**11w-III**

|   |             |              |              |
|---|-------------|--------------|--------------|
| 8 | 0.212290000 | -1.128104000 | -1.654870000 |
| 8 | 0.496359000 | 0.419762000  | 0.386427000  |
| 8 | 2.636554000 | -0.333502000 | -2.453002000 |

|   |              |              |              |
|---|--------------|--------------|--------------|
| 8 | 0.524040000  | -2.954672000 | -3.759055000 |
| 8 | 1.316849000  | -5.152941000 | -2.276846000 |
| 8 | 3.587909000  | -2.438955000 | -0.983643000 |
| 8 | 3.142092000  | -2.111571000 | -4.625772000 |
| 8 | 1.068132000  | -3.224168000 | -0.212042000 |
| 8 | 4.117466000  | -4.269816000 | -2.845608000 |
| 8 | 3.110241000  | 1.351499000  | -0.253843000 |
| 8 | 4.179395000  | -0.786678000 | 1.307929000  |
| 8 | 1.551099000  | -1.566445000 | 2.109601000  |
| 1 | -0.660533000 | -0.916164000 | -2.015249000 |
| 1 | -0.339391000 | 0.875684000  | 0.540406000  |
| 1 | 0.330564000  | -0.181110000 | -0.435788000 |
| 1 | 4.200164000  | -1.407111000 | 0.553609000  |
| 1 | 3.338237000  | -1.047052000 | 1.741603000  |
| 1 | 4.009938000  | -3.617381000 | -2.098309000 |
| 1 | 1.055780000  | -4.011256000 | -0.799238000 |
| 1 | 0.604967000  | -2.515007000 | -0.740296000 |
| 1 | 2.181617000  | 1.229422000  | 0.026503000  |
| 1 | 3.583692000  | 0.715258000  | 0.325995000  |
| 1 | 1.675202000  | -0.523125000 | -2.254708000 |
| 1 | 2.874973000  | 0.380284000  | -1.819203000 |
| 1 | 3.125427000  | -1.381897000 | -3.975228000 |
| 1 | 3.593167000  | -2.833784000 | -4.152551000 |
| 1 | 1.345285000  | -2.668902000 | -0.208450000 |
| 1 | 0.428241000  | -2.298712000 | -3.027191000 |
| 1 | 1.377153000  | -2.321342000 | 1.516619000  |
| 1 | 1.104165000  | -0.834609000 | 1.636571000  |
| 1 | 2.720857000  | -2.749949000 | -0.617558000 |
| 1 | 3.309466000  | -1.664000000 | -1.536125000 |
| 1 | 0.970097000  | -4.458772000 | -2.887797000 |
| 1 | 2.271956000  | -5.121064000 | -2.458127000 |
| 1 | 5.012993000  | -4.614623000 | -2.748459000 |

**11w-IV**

|   |              |              |              |
|---|--------------|--------------|--------------|
| 8 | 0.000446000  | -0.002091000 | -1.998474000 |
| 8 | -0.170674000 | 1.968147000  | -0.264306000 |
| 8 | 0.169805000  | -1.966501000 | -0.261260000 |
| 8 | 2.716723000  | 0.173195000  | -1.814275000 |
| 8 | 3.045933000  | -1.896904000 | 0.244356000  |
| 8 | -2.716594000 | -0.172339000 | -1.816803000 |
| 8 | -0.000783000 | 0.001080000  | 1.691032000  |
| 8 | -2.710445000 | -2.199640000 | 0.082560000  |
| 8 | -2.793438000 | -0.139073000 | 1.967091000  |
| 8 | -3.045083000 | 1.895047000  | 0.244444000  |
| 8 | 2.792768000  | 0.137925000  | 1.966105000  |
| 8 | 2.710405000  | 2.201107000  | 0.082868000  |
| 1 | 0.000190000  | -0.004891000 | -2.966084000 |
| 1 | -2.954421000 | 0.603543000  | -1.280449000 |
| 1 | -1.725193000 | -0.100339000 | -1.900327000 |
| 1 | -1.820032000 | -0.080619000 | -2.085297000 |
| 1 | -2.870706000 | -0.932562000 | 1.385465000  |
| 1 | 1.819648000  | 0.080593000  | 2.086481000  |
| 1 | 1.113470000  | -2.189219000 | -0.175231000 |
| 1 | -3.755272000 | 2.483229000  | 0.524869000  |
| 1 | -3.018752000 | 1.169022000  | 0.931661000  |
| 1 | -0.125286000 | 1.317061000  | -1.031782000 |
| 1 | -1.115449000 | 2.186262000  | -0.177704000 |
| 1 | 1.755513000  | 2.395588000  | 0.052595000  |
| 1 | 1.725580000  | 0.099945000  | -1.899186000 |
| 1 | -1.755321000 | -2.393117000 | 0.051951000  |
| 1 | -2.807218000 | -1.561814000 | -0.663830000 |
| 1 | 0.032674000  | -0.762806000 | 1.064331000  |
| 1 | -0.033064000 | 0.764288000  | 1.063735000  |
| 1 | 3.765462000  | -2.477295000 | 0.517177000  |
| 1 | 0.126165000  | -1.316153000 | -1.030153000 |
| 1 | 2.954635000  | -0.603566000 | -1.279191000 |
| 1 | 2.806437000  | 1.562973000  | -0.663341000 |
| 1 | 2.869585000  | 0.931741000  | 1.384984000  |
| 1 | 3.018856000  | -1.171501000 | 0.932015000  |

**11w-V**

|   |              |              |              |
|---|--------------|--------------|--------------|
| 8 | -0.181634000 | -0.200585000 | -2.076033000 |
| 8 | -2.741417000 | -0.134154000 | -1.726173000 |
| 8 | 0.047131000  | -2.061477000 | -0.107230000 |
| 8 | -0.013178000 | 1.876335000  | -0.449123000 |
| 8 | 2.592295000  | -0.118665000 | -1.847072000 |
| 8 | 2.858272000  | -2.121247000 | 0.122086000  |
| 8 | 0.123644000  | 0.046881000  | 1.703499000  |
| 8 | 2.614323000  | 2.202162000  | -0.017423000 |

|   |              |              |              |
|---|--------------|--------------|--------------|
| 8 | -2.730631000 | 2.061534000  | 0.090657000  |
| 8 | 2.920005000  | 0.053462000  | 2.051722000  |
| 8 | -2.802018000 | -1.993925000 | 0.422468000  |
| 8 | -2.677982000 | 0.219207000  | 2.236454000  |
| 1 | -0.070311000 | -0.228087000 | -3.036955000 |
| 1 | -3.166766000 | -0.313439000 | -2.572960000 |
| 1 | -1.730971000 | -0.175207000 | -1.916934000 |
| 1 | -1.700282000 | 0.199003000  | 2.278177000  |
| 1 | -2.857327000 | -0.593752000 | 1.717528000  |
| 1 | 1.940018000  | 0.040207000  | 2.110167000  |
| 1 | 1.005002000  | -2.267040000 | -0.017685000 |
| 1 | -0.003532000 | -1.499914000 | -0.924752000 |
| 1 | -2.915963000 | 1.408262000  | -0.612505000 |
| 1 | -2.799162000 | 1.510552000  | 0.903669000  |
| 1 | -0.081166000 | 1.176595000  | -1.166315000 |
| 1 | -0.947709000 | 2.120293000  | -0.249814000 |
| 1 | 1.631097000  | 2.236293000  | -0.130441000 |
| 1 | 2.760104000  | 0.688252000  | -1.329291000 |
| 1 | 1.605307000  | -0.141317000 | -1.915607000 |
| 1 | -1.863656000 | -2.255740000 | 0.368176000  |
| 1 | -2.897438000 | -1.426661000 | -0.369355000 |
| 1 | 0.056676000  | -0.763990000 | 1.143033000  |
| 1 | 0.103313000  | 0.751595000  | 1.018404000  |
| 1 | 2.896086000  | -1.506254000 | -0.642861000 |
| 1 | 2.986247000  | -1.502515000 | 0.869712000  |
| 1 | 3.064364000  | 0.809556000  | 1.457561000  |
| 1 | 2.915574000  | 3.097080000  | -0.211603000 |

**OH(H<sub>2</sub>O)<sub>12</sub>**

**12w-I**

|   |              |              |              |
|---|--------------|--------------|--------------|
| 8 | -0.084386000 | 0.918099000  | 2.094427000  |
| 8 | -0.411821000 | 3.086346000  | 0.631777000  |
| 8 | -0.095793000 | -1.600167000 | 1.354550000  |
| 8 | -2.632395000 | 0.881122000  | 1.199380000  |
| 8 | 0.120607000  | -1.116451000 | -1.348360000 |
| 8 | 2.900441000  | -1.577284000 | -1.606801000 |
| 8 | -2.704654000 | 1.253386000  | -1.554939000 |
| 8 | 2.536101000  | 0.750077000  | 1.400358000  |
| 8 | 3.034771000  | 1.303070000  | -1.118678000 |
| 8 | 0.264715000  | 1.664709000  | -1.618387000 |
| 8 | -2.938234000 | -2.011032000 | 0.873463000  |
| 8 | 2.724733000  | -2.079238000 | 1.215279000  |
| 8 | -2.614329000 | -1.549306000 | -1.741074000 |
| 1 | -0.076092000 | 1.056860000  | 3.052147000  |
| 1 | -2.908742000 | -0.050238000 | 1.250916000  |
| 1 | -1.709679000 | 0.874526000  | 1.582246000  |
| 1 | -1.630592000 | -1.544427000 | -1.753478000 |
| 1 | -2.802000000 | -0.585021000 | -1.799415000 |
| 1 | 1.923658000  | -1.513610000 | -1.673644000 |
| 1 | -1.375915000 | 3.167175000  | 0.621531000  |
| 1 | -0.255618000 | 2.321359000  | 1.268733000  |
| 1 | 1.242620000  | 1.659594000  | -1.628116000 |
| 1 | 0.050492000  | 2.212294000  | -0.822712000 |
| 1 | -3.593450000 | -2.703824000 | 1.014444000  |
| 1 | -2.878934000 | -1.903331000 | -0.119039000 |
| 1 | -0.109956000 | -0.654758000 | 1.715032000  |
| 1 | -1.022277000 | -1.897946000 | 1.384682000  |
| 1 | 1.756761000  | -2.157083000 | 1.314188000  |
| 1 | 2.852673000  | -2.035834000 | 0.243918000  |
| 1 | 2.689512000  | -0.217953000 | 1.458932000  |
| 1 | 1.581126000  | 0.856660000  | 1.668814000  |
| 1 | -1.789761000 | 1.444360000  | -1.821979000 |
| 1 | -2.651591000 | 1.199376000  | -0.570929000 |
| 1 | 0.116135000  | -0.133005000 | -1.411977000 |
| 1 | 0.078314000  | -1.283590000 | -0.374905000 |
| 1 | 2.852204000  | 1.144248000  | -0.139669000 |
| 1 | 3.706108000  | 1.995282000  | -1.134993000 |
| 1 | 3.156963000  | -0.637772000 | -1.572693000 |

**12w-II**

|   |              |              |              |
|---|--------------|--------------|--------------|
| 8 | -0.240953000 | 1.445931000  | 1.821113000  |
| 8 | -0.172940000 | -1.211951000 | 1.747705000  |
| 8 | 0.149482000  | 3.269099000  | -0.050390000 |
| 8 | -2.659150000 | 1.207352000  | 0.910042000  |
| 8 | 2.436090000  | 1.149034000  | 1.162046000  |
| 8 | 2.936127000  | 0.862465000  | -1.557125000 |
| 8 | 0.199166000  | 1.236574000  | -1.967819000 |
| 8 | 0.163498000  | -1.347859000 | -0.938116000 |

|   |              |              |              |
|---|--------------|--------------|--------------|
| 8 | -2.693925000 | 0.692704000  | -1.886556000 |
| 8 | -2.579069000 | -2.107722000 | -1.392290000 |
| 8 | -2.935488000 | -1.612062000 | 1.389316000  |
| 8 | 2.720247000  | -2.051296000 | -1.154572000 |
| 8 | 2.640351000  | -1.667263000 | 1.766499000  |
| 1 | -0.244049000 | 1.775273000  | 2.731178000  |
| 1 | -1.722577000 | 1.341618000  | 1.295983000  |
| 1 | -1.604678000 | -2.064606000 | -1.332079000 |
| 1 | -2.777476000 | -1.192112000 | -1.683695000 |
| 1 | 1.742321000  | -1.849330000 | -1.149203000 |
| 1 | 1.089932000  | 3.483166000  | 0.020764000  |
| 1 | -0.001842000 | 2.644377000  | 0.722187000  |
| 1 | 1.177040000  | 1.137253000  | -2.026958000 |
| 1 | 0.108792000  | 1.982288000  | -1.329333000 |
| 1 | -2.912508000 | -1.889622000 | 0.446883000  |
| 1 | -0.204333000 | -0.214523000 | 1.858208000  |
| 1 | -1.117179000 | -1.485364000 | 1.778418000  |
| 1 | 1.669540000  | -1.706050000 | 1.876489000  |
| 1 | 2.774101000  | -1.943183000 | 0.841789000  |
| 1 | 2.643885000  | 0.245334000  | 1.475506000  |
| 1 | 1.482457000  | 1.253909000  | 1.404957000  |
| 1 | -1.781991000 | 0.879581000  | -2.170793000 |
| 1 | -2.679026000 | 0.936590000  | -0.937136000 |
| 1 | 0.094284000  | -0.414267000 | -1.250139000 |
| 1 | 0.047952000  | -1.284635000 | 0.046432000  |
| 1 | 2.798407000  | 1.023022000  | -0.592246000 |
| 1 | 3.081838000  | -0.098974000 | -1.588231000 |
| 1 | 2.805909000  | -2.860540000 | -1.672272000 |
| 1 | -3.126659000 | 2.025903000  | 1.116276000  |
| 1 | -3.051655000 | -0.645138000 | 1.318195000  |

**12w-III**

|   |              |              |              |
|---|--------------|--------------|--------------|
| 8 | 0.108100000  | 1.280796000  | -1.909289000 |
| 8 | -0.193247000 | 3.230353000  | -0.183031000 |
| 8 | 0.221152000  | -1.398457000 | -1.609514000 |
| 8 | 2.568414000  | 1.229290000  | -1.045261000 |
| 8 | -0.019206000 | -1.393356000 | 1.129079000  |
| 8 | -2.751527000 | -2.019608000 | 1.317280000  |
| 8 | 2.717393000  | 0.953541000  | 1.781748000  |
| 8 | -2.497978000 | 0.854754000  | -1.214572000 |
| 8 | -2.999595000 | 0.905382000  | 1.378327000  |
| 8 | -0.220419000 | 1.357296000  | 1.886877000  |
| 8 | 3.013604000  | -1.605775000 | -1.307111000 |
| 8 | -2.590705000 | -1.929963000 | -1.541355000 |
| 8 | 2.779350000  | -1.896550000 | 1.505894000  |
| 1 | 0.092616000  | 1.520625000  | -2.846847000 |
| 1 | 2.973762000  | 2.061939000  | -1.316571000 |
| 1 | 1.619428000  | 1.277416000  | -1.410783000 |
| 1 | 1.801433000  | -1.928526000 | 1.489780000  |
| 1 | 2.923045000  | -0.952118000 | 1.723703000  |
| 1 | -1.775750000 | -1.923472000 | 1.380557000  |
| 1 | -1.110015000 | 3.520278000  | -0.277107000 |
| 1 | -0.087696000 | 2.544701000  | -0.915938000 |
| 1 | -1.186419000 | 1.246186000  | 1.974247000  |
| 1 | -0.156139000 | 2.045460000  | 1.183672000  |
| 1 | 3.074994000  | -0.632052000 | -1.316807000 |
| 1 | 3.032071000  | -1.807029000 | -0.344647000 |
| 1 | 0.187555000  | -0.418365000 | -1.793178000 |
| 1 | 1.180281000  | -1.613414000 | -1.639655000 |
| 1 | -1.623080000 | -1.985614000 | -1.662607000 |
| 1 | -2.709931000 | -2.098695000 | -0.582241000 |
| 1 | -2.630710000 | -0.095453000 | -1.436661000 |
| 1 | -1.552413000 | 1.021215000  | -1.475094000 |
| 1 | 1.804979000  | 1.100762000  | 2.083754000  |
| 1 | 2.653556000  | 1.106702000  | 0.815658000  |
| 1 | -0.008681000 | -0.438612000 | 1.353904000  |
| 1 | 0.043075000  | -1.396712000 | 0.142000000  |
| 1 | -2.816186000 | 0.931786000  | 0.389735000  |
| 1 | -3.768461000 | 1.473665000  | 1.504575000  |
| 1 | -3.044003000 | -1.102291000 | 1.463978000  |

**12w-IV**

|   |             |              |              |
|---|-------------|--------------|--------------|
| 1 | 2.809786000 | -1.166248000 | -1.085994000 |
| 1 | 2.831207000 | -1.160288000 | 1.051941000  |
| 1 | 2.809750000 | 1.166253000  | 1.085961000  |
| 1 | 2.831239000 | 1.160185000  | -1.051993000 |
| 8 | 3.333410000 | -0.000026000 | 0.000022000  |
| 8 | 2.426018000 | -1.864637000 | -1.693195000 |

|   |              |              |              |
|---|--------------|--------------|--------------|
| 8 | 2.465300000  | -1.908048000 | 1.618744000  |
| 8 | 2.426035000  | 1.864667000  | 1.693167000  |
| 8 | 2.465327000  | 1.907968000  | -1.618753000 |
| 1 | 2.472397000  | -2.666784000 | -1.155152000 |
| 1 | 2.677014000  | -1.644093000 | 2.522940000  |
| 1 | 2.472441000  | 2.666800000  | 1.155106000  |
| 1 | 2.676999000  | 1.644007000  | -2.522956000 |
| 1 | 0.647724000  | -1.420499000 | -1.772537000 |
| 1 | 0.656191000  | -1.804112000 | 1.354827000  |
| 1 | 0.647733000  | 1.420617000  | 1.772548000  |
| 1 | 0.656217000  | 1.804094000  | -1.354809000 |
| 8 | -0.286858000 | -1.168120000 | -1.602408000 |
| 8 | -0.278151000 | -1.578203000 | 1.152704000  |
| 8 | -0.286837000 | 1.168188000  | 1.602425000  |
| 8 | -0.278138000 | 1.578252000  | -1.152674000 |
| 1 | -0.272444000 | -0.184984000 | -1.542425000 |
| 1 | -0.302683000 | -1.518409000 | 0.169493000  |
| 1 | -0.272359000 | 0.185059000  | 1.542403000  |
| 1 | -0.302651000 | 1.518464000  | -0.169461000 |
| 1 | -2.227606000 | -1.495581000 | -1.666389000 |
| 1 | -2.221439000 | -1.662713000 | 1.497913000  |
| 1 | -2.227610000 | 1.495569000  | 1.666361000  |
| 1 | -2.221436000 | 1.662716000  | -1.497910000 |
| 8 | -3.171265000 | -1.343039000 | -1.479919000 |
| 8 | -3.165937000 | -1.480546000 | 1.346705000  |
| 8 | -3.171268000 | 1.343027000  | 1.479893000  |
| 8 | -3.165928000 | 1.480521000  | -1.346702000 |
| 1 | -3.234686000 | -1.492363000 | -0.510053000 |
| 1 | -3.233117000 | -0.510531000 | 1.494833000  |
| 1 | -3.234684000 | 1.492335000  | 0.510023000  |
| 1 | -3.233076000 | 0.510502000  | -1.494780000 |
| 1 | 4.301432000  | -0.000021000 | 0.000038000  |

**12w-V**

|   |              |               |              |
|---|--------------|---------------|--------------|
| 1 | -0.208073000 | 0.018874000   | 2.794950000  |
| 8 | 0.063619000  | 0.024060000   | 1.865825000  |
| 8 | -3.835918000 | -1.660328000  | 1.191820000  |
| 1 | -3.464274000 | -1.879128000  | 0.298067000  |
| 1 | -3.356494000 | -2.253826000  | 1.784119000  |
| 8 | 3.225932000  | -0.318615000  | -1.950590000 |
| 1 | 2.292451000  | -0.088461000  | -2.128033000 |
| 1 | 3.466640000  | 0.350040000   | -1.274394000 |
| 8 | 2.600282000  | -0.563242000  | 1.987586000  |
| 1 | 1.603429000  | -0.335857000  | 1.983955000  |
| 1 | 2.842876000  | -0.620175000  | 2.919273000  |
| 8 | 0.725946000  | 2.148344000   | 0.351212000  |
| 1 | -0.063061000 | 2.719630000   | 0.267092000  |
| 1 | 0.469765000  | 1.464097000   | 1.029169000  |
| 8 | -1.893214000 | 3.333335000   | -0.008315000 |
| 1 | -2.071963000 | 3.041055000   | -0.916126000 |
| 1 | -2.244892000 | 2.578313000   | 0.506265000  |
| 8 | -2.384113000 | 0.775646000   | -1.838122000 |
| 1 | -2.403612000 | 0.776148000   | -0.856349000 |
| 1 | -1.423807000 | 0.693129000   | -2.021155000 |
| 8 | -0.072076000 | -1.832375000  | -0.095388000 |
| 1 | -0.074217000 | -1.271557000  | 0.724984000  |
| 1 | 0.838792000  | -2.206501000  | -0.136700000 |
| 8 | 0.419713000  | 0.353876000   | -1.789297000 |
| 1 | 0.245513000  | -0.452412000  | -1.250316000 |
| 1 | 0.580010000  | 1.037473000   | -1.098003000 |
| 8 | 2.646549000  | -2.439622000  | -0.164793000 |
| 1 | 2.930111000  | -1.798973000  | -0.855736000 |
| 1 | 2.787754000  | -1.9311617000 | 0.657178000  |
| 8 | 3.524617000  | 1.493551000   | 0.245079000  |
| 1 | 3.345901000  | 0.814490000   | 0.925904000  |
| 1 | 2.673416000  | 1.969852000   | 0.217695000  |
| 8 | -2.385428000 | 0.772260000   | 0.993469000  |
| 1 | -2.977753000 | 0.018055000   | 1.191082000  |
| 1 | -1.484260000 | 0.467140000   | 1.296910000  |
| 8 | -2.628885000 | -2.063600000  | -1.227884000 |
| 1 | -1.702754000 | -2.122036000  | -0.910081000 |
| 1 | -2.657692000 | -1.174080000  | -1.634572000 |

**OH(H<sub>2</sub>O)<sub>13</sub>**

**13w-I**

|   |              |              |              |
|---|--------------|--------------|--------------|
| 8 | -0.215290000 | -0.702822000 | -2.040073000 |
| 8 | -1.014091000 | -2.745824000 | -0.467263000 |
| 8 | 0.689432000  | 1.685447000  | -1.435711000 |

|   |              |              |              |
|---|--------------|--------------|--------------|
| 8 | -2.463975000 | 0.208101000  | -1.051157000 |
| 8 | 0.801520000  | 1.189815000  | 1.269917000  |
| 8 | 3.592919000  | 0.735927000  | 1.484927000  |
| 8 | -2.557846000 | -0.138902000 | 1.704317000  |
| 8 | 2.336385000  | -1.424811000 | -1.386106000 |
| 8 | 2.753660000  | -2.040079000 | 1.138615000  |
| 8 | 0.029961000  | -1.461914000 | 1.677428000  |
| 8 | -1.854296000 | 3.021962000  | -0.862451000 |
| 8 | 3.508773000  | 1.165176000  | -1.353570000 |
| 8 | -1.574366000 | 2.544096000  | 1.762462000  |
| 1 | -0.291540000 | -0.870039000 | -2.990330000 |
| 1 | -2.446256000 | 1.172787000  | -1.177552000 |
| 1 | -1.610381000 | -0.129666000 | -1.482025000 |
| 1 | -0.656508000 | 2.187558000  | 1.722308000  |
| 1 | -2.082647000 | 1.718655000  | 1.908138000  |
| 1 | 2.650636000  | 0.994660000  | 1.566407000  |
| 1 | -1.987496000 | -2.692109000 | -0.457027000 |
| 1 | -0.735476000 | -2.064656000 | -1.138846000 |
| 1 | 0.955421000  | -1.775686000 | 1.708170000  |
| 1 | -0.352132000 | -1.966999000 | 0.911026000  |
| 1 | -2.255025000 | 3.886579000  | -1.007906000 |
| 1 | -1.791352000 | 2.924728000  | 0.129738000  |
| 1 | 0.337554000  | 0.790851000  | -1.753284000 |
| 1 | -0.081481000 | 2.279143000  | -1.448017000 |
| 1 | 2.627890000  | 1.575889000  | -1.438871000 |
| 1 | 3.646895000  | 1.117307000  | -0.383871000 |
| 1 | 2.810329000  | -0.572928000 | -1.500923000 |
| 1 | 1.396021000  | -1.211832000 | -1.632897000 |
| 1 | -1.737875000 | -0.590399000 | -1.975501000 |
| 1 | -2.441463000 | -0.034747000 | 0.730115000  |
| 1 | 0.484097000  | 0.260839000  | 1.362484000  |
| 1 | 0.795868000  | 1.343944000  | 0.293538000  |
| 1 | 2.579132000  | -1.860464000 | 0.162996000  |
| 1 | 3.149415000  | -2.919424000 | 1.158804000  |
| 1 | 3.530528000  | -0.236654000 | 1.491181000  |
| 8 | -3.911994000 | -2.071590000 | -0.268860000 |
| 1 | 3.642910000  | -1.259647000 | -0.742417000 |
| 1 | -3.817599000 | -1.784329000 | 0.653760000  |

**13w-II**

|   |              |              |              |
|---|--------------|--------------|--------------|
| 1 | 0.200794000  | -0.637091000 | -2.660205000 |
| 8 | 0.036606000  | -0.669015000 | -1.705003000 |
| 8 | 3.836985000  | -1.451031000 | -0.254875000 |
| 1 | 3.553727000  | -1.293964000 | 0.672055000  |
| 1 | 3.167149000  | -2.085775000 | -0.581065000 |
| 8 | 1.512510000  | -2.949300000 | -1.109523000 |
| 1 | 0.973829000  | -2.162227000 | -1.377891000 |
| 1 | 1.135746000  | -3.172663000 | -0.246062000 |
| 8 | -3.538503000 | 0.552693000  | 1.761057000  |
| 1 | -2.675017000 | 0.978629000  | 1.924983000  |
| 1 | -3.702714000 | 0.769008000  | 0.817631000  |
| 8 | -2.414749000 | -1.597212000 | -1.551595000 |
| 1 | -1.457160000 | -1.273813000 | -1.648856000 |
| 1 | -2.517749000 | -2.280911000 | -2.224288000 |
| 8 | -0.925235000 | 1.810576000  | -1.086467000 |
| 1 | -0.207825000 | 2.445261000  | -1.291814000 |
| 1 | -0.565039000 | 0.925480000  | -1.366560000 |
| 8 | 1.479407000  | 3.348543000  | -1.369920000 |
| 1 | 1.642313000  | 3.564657000  | -0.438327000 |
| 1 | 1.963465000  | 2.500834000  | -1.455767000 |
| 8 | 2.082189000  | 1.997416000  | 1.450901000  |
| 1 | 2.136575000  | 1.539808000  | 0.583719000  |
| 1 | 1.128264000  | 1.953774000  | 1.664256000  |
| 8 | 0.013773000  | -1.233588000 | 1.120856000  |
| 1 | 0.065035000  | -1.045522000 | 0.164221000  |
| 1 | -0.894485000 | -1.614100000 | 1.244288000  |
| 8 | -0.751112000 | 1.448259000  | 1.677198000  |
| 1 | -0.477712000 | 0.506958000  | 1.632065000  |
| 1 | -0.871689000 | 1.662911000  | 0.722838000  |
| 8 | -2.582926000 | -2.036357000 | 1.259324000  |
| 1 | -3.008106000 | -1.189990000 | 1.531347000  |
| 1 | -2.677243000 | -2.023138000 | 0.286513000  |
| 8 | -3.646319000 | 0.965546000  | -1.054500000 |
| 1 | -3.384797000 | 0.071702000  | -1.346331000 |
| 1 | -2.817561000 | 1.469026000  | -1.171061000 |
| 8 | 2.320924000  | 0.718446000  | -1.060489000 |
| 1 | 2.999723000  | 0.026653000  | -0.878264000 |
| 1 | 1.508048000  | 0.194726000  | -1.277479000 |
| 8 | 2.635660000  | -0.777053000 | 2.240442000  |

|   |             |              |             |
|---|-------------|--------------|-------------|
| 1 | 1.729090000 | -1.050225000 | 2.004361000 |
| 1 | 2.579656000 | 0.196610000  | 2.176447000 |

**13w-III**

|   |              |              |              |
|---|--------------|--------------|--------------|
| 1 | -0.277263000 | -1.517019000 | 2.316445000  |
| 8 | -0.176225000 | -1.293659000 | 1.378540000  |
| 8 | 0.942862000  | 1.967969000  | -1.121623000 |
| 1 | 0.162538000  | 2.570676000  | -1.168237000 |
| 1 | 0.572817000  | 1.096426000  | -1.373500000 |
| 8 | 2.231609000  | -2.260687000 | 0.903803000  |
| 1 | 2.233641000  | -3.181965000 | 1.190277000  |
| 1 | 1.294643000  | -1.929926000 | 1.100571000  |
| 8 | -2.553352000 | 0.046044000  | 1.195378000  |
| 1 | -3.210865000 | -0.642583000 | 0.971437000  |
| 1 | -1.696693000 | -0.453009000 | 1.277117000  |
| 8 | 0.013266000  | -0.700784000 | -1.428190000 |
| 1 | -0.032182000 | -0.858715000 | -0.465654000 |
| 1 | 0.918386000  | -1.026003000 | -1.679760000 |
| 8 | -2.561608000 | 0.604755000  | -1.560902000 |
| 1 | -1.733364000 | 0.156662000  | -1.813255000 |
| 1 | -2.545713000 | 0.514324000  | -0.581879000 |
| 8 | 0.910247000  | 1.262383000  | 1.597441000  |
| 1 | 0.969394000  | 1.557914000  | 0.660311000  |
| 1 | 0.509910000  | 0.357890000  | 1.532683000  |
| 8 | 3.663700000  | 1.011476000  | -1.185785000 |
| 1 | 2.858142000  | 1.558219000  | -1.237450000 |
| 1 | 3.749921000  | 0.828123000  | -0.224991000 |
| 8 | -1.483563000 | 3.290393000  | -1.010202000 |
| 1 | -1.584834000 | 3.206029000  | -0.035924000 |
| 1 | -1.983895000 | 2.521165000  | -1.344506000 |
| 8 | -1.494593000 | -3.144007000 | -0.157881000 |
| 1 | -1.024765000 | -2.539248000 | 0.475853000  |
| 1 | -1.085196000 | -2.904821000 | -1.002887000 |
| 8 | 2.576320000  | -1.483687000 | -1.817572000 |
| 1 | 2.614728000  | -1.876226000 | -0.922984000 |
| 1 | 3.048891000  | -0.625879000 | -1.702896000 |
| 8 | -1.600414000 | 2.687682000  | 1.762815000  |
| 1 | -0.701144000 | 2.317555000  | 1.874818000  |
| 1 | -2.141426000 | 1.877822000  | 1.713305000  |
| 8 | -4.024011000 | -1.891978000 | -0.290598000 |
| 1 | -3.859358000 | -1.259966000 | -1.009672000 |
| 1 | -3.205764000 | -2.436966000 | -0.287138000 |
| 8 | 3.572203000  | 0.241160000  | 1.553270000  |
| 1 | 2.716906000  | 0.682234000  | 1.741668000  |
| 1 | 3.301019000  | -0.689209000 | 1.448314000  |

**13w-IV**

|   |              |              |              |
|---|--------------|--------------|--------------|
| 1 | -0.335068000 | -1.504486000 | 2.332780000  |
| 8 | -0.212864000 | -1.284372000 | 1.396591000  |
| 8 | -4.044623000 | -1.858973000 | -0.309821000 |
| 1 | -3.868740000 | -1.232229000 | -1.030958000 |
| 1 | -3.229503000 | -2.408925000 | -0.297166000 |
| 8 | -1.525363000 | -3.123581000 | -0.158274000 |
| 1 | -1.055489000 | -2.524695000 | 0.480555000  |
| 1 | -1.104882000 | -2.886396000 | -0.998556000 |
| 8 | 3.779294000  | 0.893534000  | -1.211223000 |
| 1 | 2.958917000  | 1.417785000  | -1.299997000 |
| 1 | 3.830931000  | 0.761884000  | -0.240123000 |
| 8 | 2.218258000  | -2.201203000 | 1.006073000  |
| 1 | 1.264737000  | -1.894934000 | 1.168330000  |
| 1 | 2.259659000  | -3.092449000 | 1.373066000  |
| 8 | 0.791298000  | 1.282980000  | 1.579976000  |
| 1 | 0.011018000  | 1.854647000  | 1.771405000  |
| 1 | 0.415074000  | 0.365690000  | 1.548878000  |
| 8 | -1.598510000 | 2.710513000  | 1.713712000  |
| 1 | -1.610022000 | 3.030840000  | 0.784949000  |
| 1 | -2.149964000 | 1.907516000  | 1.667293000  |
| 8 | -1.468710000 | 3.277681000  | -1.076030000 |
| 1 | -1.953192000 | 2.496156000  | -1.405685000 |
| 1 | -0.537693000 | 2.996832000  | -1.185190000 |
| 8 | 0.027355000  | -0.729086000 | -1.449820000 |
| 1 | -0.033757000 | -0.841492000 | -0.482312000 |
| 1 | 0.933020000  | -1.074864000 | -1.667256000 |
| 8 | 1.079607000  | 1.935090000  | -1.102382000 |
| 1 | 0.692863000  | 1.095403000  | -1.423450000 |
| 1 | 1.047700000  | 1.783248000  | -0.127076000 |
| 8 | 2.589197000  | -1.581471000 | -1.748687000 |

|   |              |              |              |
|---|--------------|--------------|--------------|
| 1 | 3.101652000  | -0.743470000 | -1.662461000 |
| 1 | 2.604157000  | -1.937733000 | -0.838377000 |
| 8 | 3.496421000  | 0.334277000  | 1.572808000  |
| 1 | 3.190994000  | -0.590031000 | 1.507554000  |
| 1 | 2.667348000  | 0.818866000  | 1.749520000  |
| 8 | -2.574334000 | 0.073661000  | 1.182451000  |
| 1 | -3.239749000 | -0.605982000 | 0.953638000  |
| 1 | -1.726331000 | -0.438157000 | 1.270637000  |
| 8 | -2.543023000 | 0.594130000  | -1.584759000 |
| 1 | -1.713847000 | 0.143652000  | -1.830208000 |
| 1 | -2.531879000 | 0.517874000  | -0.604725000 |

**13w-V**

|   |              |              |              |
|---|--------------|--------------|--------------|
| 1 | -0.431656000 | 1.323261000  | 2.422976000  |
| 8 | -0.241872000 | 1.119755000  | 1.494460000  |
| 8 | -1.437065000 | -2.977250000 | -1.290244000 |
| 1 | -1.988336000 | -2.211140000 | -1.527168000 |
| 1 | -0.526089000 | -2.675208000 | -1.466303000 |
| 8 | -2.594963000 | -0.373197000 | 1.222322000  |
| 1 | -2.634321000 | -0.528420000 | 0.256768000  |
| 1 | -1.766171000 | 0.158739000  | 1.321203000  |
| 8 | 3.575120000  | -0.478667000 | 1.410195000  |
| 1 | 3.255840000  | 0.442738000  | 1.454409000  |
| 1 | 2.762288000  | -0.983482000 | 1.604136000  |
| 8 | -1.454666000 | 3.136322000  | 0.094398000  |
| 1 | -0.957924000 | 3.103061000  | -0.735066000 |
| 1 | -1.008102000 | 2.444073000  | 0.652768000  |
| 8 | -3.980874000 | 1.846560000  | -0.225155000 |
| 1 | -3.844460000 | 1.231152000  | 0.516340000  |
| 1 | -3.181203000 | 2.411644000  | -0.159994000 |
| 8 | 2.463450000  | 1.901371000  | -1.661779000 |
| 1 | 1.550066000  | 1.568580000  | -1.751756000 |
| 1 | 2.496788000  | 2.092175000  | -0.703561000 |
| 8 | 1.168731000  | -1.780097000 | -1.184610000 |
| 1 | 2.100699000  | -1.535572000 | -1.402472000 |
| 1 | 1.144938000  | -1.735223000 | -0.198407000 |
| 8 | -2.718253000 | -0.299583000 | -1.673307000 |
| 1 | -1.828341000 | 0.117282000  | -1.689935000 |
| 1 | -3.309617000 | 0.446633000  | -1.446168000 |
| 8 | 0.876118000  | -1.410363000 | 1.534752000  |
| 1 | 0.133118000  | -2.040029000 | 1.688842000  |
| 1 | 0.453670000  | -0.514295000 | 1.580318000  |
| 8 | -0.109815000 | 0.615845000  | -1.298251000 |
| 1 | -0.173310000 | 0.770062000  | -0.334385000 |
| 1 | 0.351775000  | -0.261128000 | -1.347663000 |
| 8 | 2.203225000  | 2.047616000  | 1.189755000  |
| 1 | 2.253852000  | 2.883021000  | 1.669790000  |
| 1 | 1.252132000  | 1.724600000  | 1.332572000  |
| 8 | 3.695736000  | -0.697370000 | -1.436093000 |
| 1 | 3.813150000  | -0.669481000 | -0.462173000 |
| 1 | 3.398282000  | 0.214655000  | -1.635740000 |
| 8 | -1.430399000 | -2.961889000 | 1.585272000  |
| 1 | -1.976509000 | -2.151715000 | 1.645705000  |
| 1 | -1.456342000 | -3.138409000 | 0.621248000  |

**OH(H<sub>2</sub>O)<sub>14</sub>**

**14w-I**

|   |              |              |              |
|---|--------------|--------------|--------------|
| 8 | 0.048672000  | -0.793448000 | -2.062506000 |
| 8 | -1.283604000 | -2.425461000 | -0.616124000 |
| 8 | 2.286543000  | -2.104515000 | -1.114064000 |
| 8 | 2.250748000  | -2.330338000 | 1.633618000  |
| 8 | -2.021322000 | 0.755742000  | -1.340914000 |
| 8 | 1.491650000  | 1.380495000  | -1.563016000 |
| 8 | -2.202544000 | 0.879377000  | 1.388726000  |
| 8 | 1.337867000  | 1.096056000  | 1.109228000  |
| 8 | -4.531824000 | -0.604528000 | -1.547030000 |
| 8 | -0.239898000 | -1.164651000 | 1.654080000  |
| 8 | -0.613588000 | 3.241503000  | -1.460839000 |
| 8 | 4.057250000  | 0.177227000  | -1.191363000 |
| 8 | -3.891859000 | -1.372742000 | -1.168093000 |
| 8 | 3.768534000  | 0.197549000  | 1.750464000  |
| 8 | -0.518232000 | 3.265769000  | 1.417513000  |
| 1 | -0.015817000 | -0.970306000 | -3.012079000 |
| 1 | -2.790155000 | 0.157334000  | -1.455778000 |
| 1 | -1.248419000 | 0.197500000  | -1.648901000 |
| 1 | 0.235947000  | 2.642974000  | 1.434100000  |
| 1 | -1.261813000 | 2.650107000  | 1.560608000  |
| 1 | -3.733050000 | -0.024810000 | 1.577313000  |



|   |              |              |              |
|---|--------------|--------------|--------------|
| 1 | -4.314999000 | -1.320862000 | 2.157253000  |
| 1 | 2.871149000  | 0.602956000  | 1.596999000  |
| 1 | -0.911709000 | -3.311007000 | -0.718477000 |
| 1 | -0.736993000 | -1.833828000 | -1.258442000 |
| 1 | 0.616787000  | -1.635713000 | 1.802219000  |
| 1 | -0.626999000 | -1.642456000 | 0.885357000  |
| 1 | -1.283830000 | 2.537126000  | -1.550804000 |
| 1 | -0.606591000 | 3.404302000  | -0.494018000 |
| 1 | 0.960178000  | 0.573254000  | -1.834123000 |
| 1 | 0.861880000  | 2.129641000  | -1.664801000 |
| 1 | 3.305470000  | 0.764862000  | -1.402825000 |
| 1 | 4.139274000  | 0.252184000  | -0.223867000 |
| 1 | 2.990931000  | -1.437307000 | -1.243066000 |
| 1 | 1.483936000  | -1.651868000 | -1.477371000 |
| 1 | -3.092989000 | -1.908021000 | -0.990590000 |
| 1 | -4.234952000 | -1.182767000 | -0.272510000 |
| 1 | -1.520673000 | 0.250473000  | 1.695297000  |
| 1 | -2.091101000 | 0.856804000  | 0.403019000  |
| 1 | 0.737825000  | 0.326022000  | 1.232822000  |
| 1 | 1.403036000  | 1.193443000  | 0.120158000  |
| 1 | 2.273561000  | -2.329529000 | 0.643860000  |
| 1 | 2.893238000  | -1.634772000 | 1.857543000  |
| 1 | 4.189735000  | 0.759977000  | 2.411186000  |

**14w-II**

|   |              |              |              |
|---|--------------|--------------|--------------|
| 8 | -0.125073000 | -0.764149000 | 2.040762000  |
| 8 | 1.188232000  | -2.443091000 | 0.652161000  |
| 8 | -1.453100000 | 1.512967000  | 1.473078000  |
| 8 | -4.059973000 | 0.369378000  | 1.116472000  |
| 8 | -2.418633000 | -1.904829000 | 1.125950000  |
| 8 | 2.019825000  | 0.710420000  | 1.336299000  |
| 8 | -1.275775000 | 1.239798000  | -1.236346000 |
| 8 | 0.739363000  | 3.273108000  | 1.396024000  |
| 8 | 2.263444000  | 0.773841000  | -1.388512000 |
| 8 | -2.378799000 | -2.324819000 | -1.466907000 |
| 8 | 0.205476000  | -1.210185000 | -1.654325000 |
| 8 | 0.716189000  | 3.274048000  | -1.471966000 |
| 8 | 3.823269000  | -1.481511000 | 1.236262000  |
| 8 | -3.852177000 | 0.206982000  | -1.742450000 |
| 8 | 4.569325000  | -0.743822000 | -1.456189000 |
| 1 | -0.075090000 | -0.909901000 | 2.996554000  |
| 1 | 2.762857000  | 0.086316000  | 1.479348000  |
| 1 | 1.219791000  | 0.189016000  | 1.632862000  |
| 1 | -0.073349000 | 2.695987000  | -1.518597000 |
| 1 | 1.427251000  | 2.619964000  | -1.601672000 |
| 1 | 3.776693000  | -0.157823000 | -1.520008000 |
| 1 | 4.387313000  | -1.444740000 | -2.094639000 |
| 1 | -2.994313000 | 0.682463000  | -1.712056000 |
| 1 | 0.829093000  | -3.326529000 | 0.803194000  |
| 1 | 0.646374000  | -1.824372000 | 1.280820000  |
| 1 | -0.653293000 | -1.658942000 | -1.794954000 |
| 1 | 0.570246000  | -1.677684000 | -0.868071000 |
| 1 | 1.371793000  | 2.538499000  | 1.508696000  |
| 1 | 0.758832000  | 3.421880000  | 0.426385000  |
| 1 | -0.969619000 | 0.688511000  | 1.758161000  |
| 1 | -0.786839000 | 2.230081000  | 1.572478000  |
| 1 | -3.312800000 | 0.966324000  | 1.313499000  |
| 1 | -3.076348000 | -1.178664000 | 1.225230000  |
| 1 | -1.579934000 | -1.508107000 | 1.487370000  |
| 1 | 3.005681000  | -1.980384000 | 1.038947000  |
| 1 | 4.198636000  | -1.309357000 | 0.350018000  |
| 1 | 1.556811000  | 0.180837000  | -1.705635000 |
| 1 | 2.122707000  | 0.777253000  | -0.406371000 |
| 1 | -0.729661000 | 0.433657000  | -1.334534000 |
| 1 | -1.367527000 | 1.333399000  | -0.253714000 |
| 1 | -2.384300000 | -2.210982000 | -0.464619000 |
| 1 | -3.555264000 | -0.718455000 | -1.802783000 |
| 1 | -4.122668000 | 0.396118000  | 0.138247000  |
| 1 | -2.645816000 | -3.239448000 | -1.616682000 |

**14w-III**

|   |              |              |              |
|---|--------------|--------------|--------------|
| 8 | 0.212311000  | -1.054920000 | -1.954581000 |
| 8 | -1.172414000 | -2.524448000 | -0.346273000 |
| 8 | 1.475397000  | 1.345641000  | -1.590843000 |
| 8 | 4.056152000  | 0.184135000  | -1.049611000 |
| 8 | -1.970411000 | 0.505275000  | -1.407985000 |
| 8 | -0.732487000 | 3.065555000  | -1.770657000 |
| 8 | -2.282485000 | 0.927204000  | 1.294506000  |
| 8 | 1.235843000  | 1.465327000  | 1.154674000  |

|   |              |              |              |
|---|--------------|--------------|--------------|
| 8 | -3.789186000 | -1.634205000 | -1.084416000 |
| 8 | 2.378685000  | -2.159422000 | -1.018373000 |
| 8 | 2.360307000  | -1.980587000 | 1.855095000  |
| 8 | -4.571145000 | -0.598523000 | 1.482454000  |
| 8 | -0.191265000 | -0.941510000 | 1.807471000  |
| 8 | -0.788506000 | 3.457710000  | 1.057719000  |
| 8 | 3.815019000  | 0.419305000  | 1.796950000  |
| 1 | 0.104822000  | -1.236705000 | -2.899593000 |
| 1 | -2.706907000 | -0.140414000 | -1.477769000 |
| 1 | -1.164040000 | -0.037102000 | -1.616992000 |
| 1 | 0.007824000  | 2.903609000  | 1.200533000  |
| 1 | -1.492739000 | 2.818125000  | 1.269246000  |
| 1 | -3.781970000 | -0.004210000 | 1.502884000  |
| 1 | -4.407949000 | -1.220807000 | 2.202349000  |
| 1 | 2.983075000  | 0.932009000  | 1.737749000  |
| 1 | 4.080886000  | 0.381171000  | 0.854096000  |
| 1 | -0.770423000 | -3.400564000 | -0.293081000 |
| 1 | -0.620091000 | -2.019114000 | -1.040521000 |
| 1 | 0.699093000  | -1.341138000 | 1.969354000  |
| 1 | -0.557861000 | -1.502396000 | 1.091468000  |
| 1 | -1.355359000 | 2.315301000  | -1.799107000 |
| 1 | -0.779728000 | 3.343223000  | -0.829912000 |
| 1 | 1.018470000  | 0.487563000  | -1.791430000 |
| 1 | 0.794655000  | 2.031548000  | -1.779741000 |
| 1 | 3.346294000  | 0.789596000  | -1.335835000 |
| 1 | 3.605688000  | -0.681498000 | -1.095123000 |
| 1 | 2.597926000  | -2.915024000 | -1.576553000 |
| 1 | 1.542168000  | -1.753206000 | -1.433389000 |
| 1 | -2.990472000 | -2.128234000 | -0.814629000 |
| 1 | -4.177676000 | -1.357732000 | -0.229935000 |
| 1 | -1.567754000 | 0.396216000  | 1.696002000  |
| 1 | -2.117468000 | 0.809826000  | 0.325550000  |
| 1 | 0.704924000  | 0.663724000  | 1.342033000  |
| 1 | 1.368125000  | 1.418201000  | 0.176278000  |
| 1 | 2.398878000  | -2.167794000 | 0.897140000  |
| 1 | 2.951084000  | -1.196474000 | 1.939878000  |

**14w-IV**

|   |              |              |              |
|---|--------------|--------------|--------------|
| 8 | 0.113864000  | -0.820776000 | -2.053714000 |
| 8 | -1.267345000 | -2.426074000 | -0.600237000 |
| 8 | 1.529652000  | 1.316583000  | -1.457975000 |
| 8 | 4.001745000  | 0.324201000  | -1.114927000 |
| 8 | -1.985325000 | 0.742899000  | -1.398454000 |
| 8 | -0.512947000 | 3.198432000  | -1.455464000 |
| 8 | -2.254214000 | 0.878639000  | 1.339882000  |
| 8 | 1.271261000  | 1.184993000  | 1.291094000  |
| 8 | -3.856250000 | -1.381790000 | -1.250446000 |
| 8 | 2.328218000  | -2.132878000 | -1.102895000 |
| 8 | 2.207034000  | -2.304322000 | 1.704480000  |
| 8 | -4.586265000 | -0.597680000 | 1.429884000  |
| 8 | -0.285875000 | -1.153110000 | 1.722871000  |
| 8 | -0.617209000 | 3.310826000  | 1.389831000  |
| 8 | 3.811411000  | 0.077815000  | 1.837973000  |
| 1 | 0.054256000  | -0.986333000 | -3.005504000 |
| 1 | -2.751791000 | 0.142503000  | -1.521477000 |
| 1 | -1.207507000 | 0.178460000  | -1.673279000 |
| 1 | 0.141095000  | 2.697960000  | 1.489371000  |
| 1 | -1.361598000 | 2.693313000  | 1.515921000  |
| 1 | -3.785029000 | -0.022457000 | 1.482710000  |
| 1 | -4.398705000 | -1.305812000 | 2.059062000  |
| 1 | 2.969457000  | 0.579452000  | 1.793184000  |
| 1 | 4.119550000  | 0.137556000  | 0.916801000  |
| 1 | -0.893902000 | -3.314132000 | -0.668808000 |
| 1 | -0.703602000 | -1.853764000 | -1.236358000 |
| 1 | 0.581538000  | -1.609501000 | 1.865303000  |
| 1 | -0.651079000 | -1.619763000 | 0.939236000  |
| 1 | -1.199437000 | 2.515327000  | -1.579611000 |
| 1 | -0.569944000 | 3.381831000  | -0.491917000 |
| 1 | 0.990515000  | 0.517878000  | -1.753068000 |
| 1 | 0.919715000  | 2.084402000  | -1.563956000 |
| 1 | 3.171634000  | 0.828800000  | -1.304770000 |
| 1 | 4.642209000  | 0.651711000  | -1.756867000 |
| 1 | 3.027861000  | -1.462744000 | -1.191975000 |
| 1 | 1.530451000  | -1.674930000 | -1.475235000 |
| 1 | -3.064458000 | -1.915407000 | -1.039766000 |
| 1 | -4.230780000 | -1.185365000 | -0.368601000 |
| 1 | -1.572610000 | 0.267169000  | 1.674730000  |
| 1 | -2.103540000 | 0.850927000  | 0.355045000  |
| 1 | 0.696343000  | 0.399025000  | 1.414929000  |

|   |             |              |             |
|---|-------------|--------------|-------------|
| 1 | 1.385120000 | 1.220366000  | 0.311350000 |
| 1 | 2.238463000 | -2.357388000 | 0.722360000 |
| 1 | 2.843717000 | -1.581153000 | 1.883158000 |

#### 14w-V

|   |              |              |              |
|---|--------------|--------------|--------------|
| 8 | 0.151861000  | -0.820567000 | -2.004814000 |
| 8 | -1.166920000 | -2.455102000 | -0.577929000 |
| 8 | 2.392705000  | -2.007055000 | -1.015763000 |
| 8 | 2.349123000  | -2.200234000 | 1.598754000  |
| 8 | -2.005931000 | 0.657306000  | -1.359662000 |
| 8 | 1.566247000  | 1.455517000  | -1.485623000 |
| 8 | -2.297196000 | 0.821520000  | 1.346060000  |
| 8 | 1.206565000  | 1.358824000  | 1.296539000  |
| 8 | -4.608020000 | -0.697159000 | 1.411574000  |
| 8 | -0.236466000 | -1.113803000 | 1.682527000  |
| 8 | -0.703590000 | 3.208201000  | -1.502519000 |
| 8 | 4.126832000  | 0.190017000  | -1.156685000 |
| 8 | -3.799172000 | -1.543492000 | -1.235306000 |
| 8 | 3.817355000  | 0.324572000  | 1.700482000  |
| 8 | -0.751219000 | 3.302203000  | 1.314140000  |
| 1 | 0.105702000  | -0.993598000 | -2.956282000 |
| 1 | -2.737879000 | 0.020949000  | -1.505282000 |
| 1 | -1.192668000 | 0.141556000  | -1.633976000 |
| 1 | -1.450992000 | 2.638745000  | 1.462194000  |
| 1 | -3.819422000 | -0.106473000 | 1.476437000  |
| 1 | -4.444421000 | -1.371990000 | 2.082287000  |
| 1 | 2.998959000  | 0.859280000  | 1.697500000  |
| 1 | 3.465422000  | -0.576136000 | 1.820961000  |
| 1 | -0.792267000 | -3.338471000 | -0.686252000 |
| 1 | -0.622358000 | -1.853871000 | -1.224585000 |
| 1 | 0.622565000  | -1.546510000 | 1.865641000  |
| 1 | -0.576167000 | -1.617765000 | 0.907073000  |
| 1 | -1.347218000 | 2.482864000  | -1.610839000 |
| 1 | 1.068439000  | 0.633817000  | -1.743353000 |
| 1 | 3.369946000  | 0.760182000  | -1.406052000 |
| 1 | 4.168013000  | 0.306403000  | -0.184183000 |
| 1 | 3.087776000  | -1.323953000 | -1.160282000 |
| 1 | 1.575716000  | -1.589422000 | -1.404239000 |
| 1 | -2.981094000 | -2.028450000 | -1.007083000 |
| 1 | -4.190091000 | -1.339402000 | -0.362886000 |
| 1 | -1.607555000 | 0.223102000  | 1.690565000  |
| 1 | -2.146253000 | 0.783521000  | 0.364710000  |
| 1 | 0.656774000  | 0.554922000  | 1.388797000  |
| 1 | 2.355595000  | -2.176707000 | 0.589005000  |
| 1 | 2.644641000  | -3.088039000 | 1.832758000  |
| 1 | 1.489701000  | 1.444284000  | -0.505722000 |
| 1 | 0.575054000  | 2.109528000  | 1.413965000  |
| 1 | 0.147219000  | 2.737151000  | -1.630075000 |
| 1 | -0.760539000 | 3.408506000  | 0.335004000  |

#### OH(H<sub>2</sub>O)<sub>15</sub>

##### 15w-I

|   |              |              |              |
|---|--------------|--------------|--------------|
| 1 | 0.024095000  | -0.831287000 | -2.592988000 |
| 8 | 0.072824000  | -0.787514000 | -1.625078000 |
| 8 | -2.338976000 | -2.235395000 | 1.702917000  |
| 1 | -1.553364000 | -1.701727000 | 1.908727000  |
| 1 | -2.178307000 | -2.464189000 | 0.764227000  |
| 8 | -0.006423000 | -0.487929000 | 1.263291000  |
| 1 | 0.642610000  | 0.251850000  | 1.381107000  |
| 1 | -0.027261000 | -0.609573000 | 0.293195000  |
| 8 | -0.100720000 | 3.651520000  | 1.294033000  |
| 1 | -0.883464000 | 3.080574000  | 1.429986000  |
| 1 | -0.072427000 | 3.722385000  | 0.315029000  |
| 8 | -4.358790000 | -0.278622000 | 1.248781000  |
| 1 | -3.768271000 | 0.491268000  | 1.359774000  |
| 1 | -3.771727000 | -1.014862000 | 1.522897000  |
| 8 | 1.749115000  | 1.609342000  | 1.322654000  |
| 1 | 1.183596000  | 2.408806000  | 1.457634000  |
| 1 | 1.837561000  | 1.561681000  | 0.340395000  |
| 8 | -1.801323000 | -2.553597000 | -1.062756000 |
| 1 | -1.049282000 | -1.914327000 | -1.282794000 |
| 1 | -1.480893000 | -3.417875000 | -1.349513000 |
| 8 | -3.976519000 | -0.647715000 | -1.519951000 |
| 1 | -4.241574000 | -0.531810000 | -0.578905000 |
| 1 | -3.396353000 | -1.430008000 | -1.486581000 |
| 8 | -0.014385000 | 3.368492000  | -1.542582000 |
| 1 | -0.775716000 | 2.772596000  | -1.677487000 |
| 1 | 0.745795000  | 2.767036000  | -1.648367000 |

|   |              |              |              |
|---|--------------|--------------|--------------|
| 8 | 1.877377000  | 1.192286000  | -1.392404000 |
| 1 | 2.758948000  | 0.786242000  | -1.494882000 |
| 1 | 1.232163000  | 0.435609000  | -1.501147000 |
| 8 | 4.258950000  | -0.321010000 | -1.088180000 |
| 1 | 5.189914000  | -0.216496000 | -1.315841000 |
| 1 | 4.220126000  | -0.262740000 | -0.090126000 |
| 8 | 2.245669000  | -2.453794000 | -1.197844000 |
| 1 | 3.003324000  | -1.856351000 | -1.328010000 |
| 1 | 1.461445000  | -1.876852000 | -1.379372000 |
| 8 | -1.866540000 | 1.169449000  | -1.479532000 |
| 1 | -2.687376000 | 0.644879000  | -1.630254000 |
| 1 | -1.156493000 | 0.477612000  | -1.524817000 |
| 8 | -2.100227000 | 1.566470000  | 1.247223000  |
| 1 | -2.063974000 | 1.520869000  | 0.260716000  |
| 1 | -1.483601000 | 0.845192000  | 1.477632000  |
| 8 | 2.202006000  | -2.403904000 | 1.606669000  |
| 1 | 2.231238000  | -2.573160000 | 0.637461000  |
| 1 | 1.358898000  | -1.923027000 | 1.695962000  |
| 8 | 3.914698000  | -0.217308000 | 1.553913000  |
| 1 | 3.284849000  | 0.515442000  | 1.696108000  |
| 1 | 3.361654000  | -1.023917000 | 1.690999000  |

##### 15w-II

|   |              |              |              |
|---|--------------|--------------|--------------|
| 1 | -0.006208000 | -0.819908000 | -2.600819000 |
| 8 | 0.024800000  | -0.770356000 | -1.632507000 |
| 8 | -2.225714000 | -2.304988000 | 1.685283000  |
| 1 | -1.416538000 | -1.797054000 | 1.862746000  |
| 1 | -2.143494000 | -2.498507000 | 0.722395000  |
| 8 | 0.086796000  | -0.478166000 | 1.262542000  |
| 1 | 0.766542000  | 0.243140000  | 1.341014000  |
| 1 | 0.024873000  | -0.618146000 | 0.296753000  |
| 8 | 0.057482000  | 3.666548000  | 1.310773000  |
| 1 | -0.721543000 | 3.103841000  | 1.484188000  |
| 1 | 0.056091000  | 3.723820000  | 0.330281000  |
| 8 | -4.129788000 | -0.294497000 | 1.369904000  |
| 1 | -3.522346000 | 0.462922000  | 1.504157000  |
| 1 | -3.547965000 | -1.060288000 | 1.589332000  |
| 8 | 1.877136000  | 1.565329000  | 1.249523000  |
| 1 | 1.344181000  | 2.379555000  | 1.408745000  |
| 1 | 1.948083000  | 1.529598000  | 0.263742000  |
| 8 | -2.066362000 | -2.481632000 | -1.092475000 |
| 1 | -1.296897000 | -1.895339000 | -1.308511000 |
| 1 | -2.837404000 | -1.929187000 | -1.313353000 |
| 8 | -4.161629000 | -0.441325000 | -1.290469000 |
| 1 | -4.246173000 | -0.381745000 | -0.294581000 |
| 1 | -5.064730000 | -0.413891000 | -1.626995000 |
| 8 | 0.073846000  | 3.374321000  | -1.522270000 |
| 1 | -0.688499000 | 2.778147000  | -1.640927000 |
| 1 | 0.833814000  | 2.775139000  | -1.652216000 |
| 8 | 1.927072000  | 1.191916000  | -1.467169000 |
| 1 | 2.779257000  | 0.705028000  | -1.560492000 |
| 1 | 1.242963000  | 0.475783000  | -1.549567000 |
| 8 | 4.119520000  | -0.505174000 | -1.345760000 |
| 1 | 3.572259000  | -1.309562000 | -1.402301000 |
| 1 | 4.258438000  | -0.400882000 | -0.376722000 |
| 8 | 1.988937000  | -2.495777000 | -1.198631000 |
| 1 | 1.711960000  | -3.337532000 | -1.581069000 |
| 1 | 1.213266000  | -1.871418000 | -1.365781000 |
| 8 | -1.825771000 | 1.195559000  | -1.397759000 |
| 1 | -2.681470000 | 0.757177000  | -1.565415000 |
| 1 | -1.153688000 | 0.461542000  | -1.484362000 |
| 8 | -1.959774000 | 1.551062000  | 1.351250000  |
| 1 | -1.953834000 | 1.535706000  | 0.364679000  |
| 1 | -1.309935000 | 0.842779000  | 1.537066000  |
| 8 | 2.313584000  | -2.378234000 | 1.629792000  |
| 1 | 2.264466000  | -2.562914000 | 0.670192000  |
| 1 | 1.490262000  | -1.875065000 | 1.763237000  |
| 8 | 4.146520000  | -0.211010000 | 1.457871000  |
| 1 | 3.520383000  | 0.526085000  | 1.579592000  |
| 1 | 3.590632000  | -0.997420000 | 1.645805000  |

##### 15w-III

|   |              |              |              |
|---|--------------|--------------|--------------|
| 1 | -0.001413000 | -0.945369000 | -2.552231000 |
| 8 | -0.013632000 | -1.020834000 | -1.584760000 |
| 8 | 0.077315000  | -0.597178000 | 1.321069000  |
| 1 | 0.844536000  | -1.186855000 | 1.562091000  |
| 1 | 0.035806000  | -0.669123000 | 0.347641000  |
| 8 | -1.836148000 | 1.071372000  | -1.336139000 |
| 1 | -2.718247000 | 0.638887000  | -1.436654000 |

|   |              |              |              |
|---|--------------|--------------|--------------|
| 1 | -1.197232000 | 0.322652000  | -1.424295000 |
| 8 | 0.091167000  | 3.813920000  | 0.965498000  |
| 1 | 0.854470000  | 3.240187000  | 1.173955000  |
| 1 | -0.657964000 | 3.243861000  | 1.228938000  |
| 8 | -4.218463000 | -0.029286000 | 1.508124000  |
| 1 | -3.566579000 | 0.692610000  | 1.587074000  |
| 1 | -3.666376000 | -0.816211000 | 1.707681000  |
| 8 | 4.228312000  | -0.180686000 | 1.508122000  |
| 1 | 3.605030000  | 0.570291000  | 1.561554000  |
| 1 | 4.345451000  | -0.281013000 | 0.539195000  |
| 8 | -2.143671000 | -2.517568000 | -1.120054000 |
| 1 | -2.006534000 | -3.381718000 | -1.525780000 |
| 1 | -1.305667000 | -1.990388000 | -1.323320000 |
| 8 | -2.361426000 | -2.155597000 | 1.712023000  |
| 1 | -1.515710000 | -1.673928000 | 1.786526000  |
| 1 | -2.344967000 | -2.431950000 | 0.775164000  |
| 8 | -0.015518000 | 3.218807000  | -1.808859000 |
| 1 | -0.802658000 | 2.641267000  | -1.799775000 |
| 1 | 0.009337000  | 3.566097000  | -0.889496000 |
| 8 | 1.777929000  | 1.157105000  | -1.477662000 |
| 1 | 1.146506000  | 0.399774000  | -1.498135000 |
| 1 | 1.219759000  | 1.937415000  | -1.719090000 |
| 8 | 4.089093000  | -0.528210000 | -1.322052000 |
| 1 | 3.466293000  | 0.192240000  | -1.536003000 |
| 1 | 3.509029000  | -1.312808000 | -1.337160000 |
| 8 | 2.049955000  | -2.569026000 | -1.071828000 |
| 1 | 1.946183000  | -3.395791000 | -1.557429000 |
| 1 | 1.230266000  | -2.018017000 | -1.297996000 |
| 8 | -4.156670000 | -0.421480000 | -1.274880000 |
| 1 | -3.658654000 | -1.258945000 | -1.300297000 |
| 1 | -4.316524000 | -0.285043000 | -0.312440000 |
| 8 | -1.815542000 | 1.660566000  | 1.357702000  |
| 1 | -1.206828000 | 0.962832000  | 1.658852000  |
| 1 | -1.836457000 | 1.498338000  | 0.382982000  |
| 8 | 1.992617000  | 1.638926000  | 1.240401000  |
| 1 | 1.323605000  | 0.973672000  | 1.491251000  |
| 1 | 2.005727000  | 1.518515000  | 0.260433000  |
| 8 | 2.251374000  | -2.135902000 | 1.740771000  |
| 1 | 2.272587000  | -2.480873000 | 0.827297000  |
| 1 | 3.013679000  | -1.510047000 | 1.759656000  |

**15w-IV**

|   |              |              |              |
|---|--------------|--------------|--------------|
| 1 | 0.018513000  | -0.907233000 | 2.571591000  |
| 8 | 0.040815000  | -0.863614000 | 1.602664000  |
| 8 | -0.021127000 | -0.750396000 | -1.314456000 |
| 1 | -0.765873000 | -1.380095000 | -1.525002000 |
| 1 | 0.018518000  | -0.779557000 | -0.338141000 |
| 8 | 1.810430000  | 1.201216000  | 1.348381000  |
| 1 | 2.692153000  | 0.783174000  | 1.492583000  |
| 1 | 1.176122000  | 0.444349000  | 1.464639000  |
| 8 | -0.140410000 | 3.691328000  | -1.193759000 |
| 1 | -0.876983000 | 3.086561000  | -1.407583000 |
| 1 | 0.633071000  | 3.122724000  | -1.383367000 |
| 8 | 4.287395000  | -0.014142000 | -1.393977000 |
| 1 | 3.614922000  | 0.682464000  | -1.513876000 |
| 1 | 3.766836000  | -0.823311000 | -1.590797000 |
| 8 | -4.182050000 | -0.359675000 | -1.545723000 |
| 1 | -3.524786000 | 0.360280000  | -1.639010000 |
| 1 | -4.349464000 | -0.360739000 | -0.586247000 |
| 8 | 2.135087000  | -2.440288000 | 1.208334000  |
| 1 | 1.916478000  | -3.307521000 | 1.570732000  |
| 1 | 1.307505000  | -1.882170000 | 1.358160000  |
| 8 | 2.504721000  | -2.195378000 | -1.608645000 |
| 1 | 1.640954000  | -1.762605000 | -1.744460000 |
| 1 | 2.450615000  | -2.425609000 | -0.659832000 |
| 8 | -0.122152000 | 3.275505000  | 1.612854000  |
| 1 | 0.692466000  | 2.738999000  | 1.674408000  |
| 1 | -0.121522000 | 3.563410000  | 0.672520000  |
| 8 | -1.766369000 | 1.113075000  | 1.328591000  |
| 1 | -1.087074000 | 0.385715000  | 1.433356000  |
| 1 | -1.273442000 | 1.943766000  | 1.549585000  |
| 8 | -4.053822000 | -0.276650000 | 1.403600000  |
| 1 | -3.298437000 | 0.357597000  | 1.490485000  |
| 1 | -4.678328000 | -0.020595000 | 2.092265000  |
| 8 | -2.136655000 | -2.530784000 | 1.173220000  |
| 1 | -2.876811000 | -1.929652000 | 1.368724000  |
| 1 | -1.339908000 | -1.968778000 | 1.344471000  |
| 8 | 4.130507000  | -0.315580000 | 1.402909000  |
| 1 | 3.637094000  | -1.155110000 | 1.441766000  |

|   |              |              |              |
|---|--------------|--------------|--------------|
| 1 | 4.319671000  | -0.211920000 | 0.442130000  |
| 8 | 1.816643000  | 1.582321000  | -1.369555000 |
| 1 | 1.246754000  | 0.842158000  | -1.643668000 |
| 1 | 1.825695000  | 1.480992000  | -0.384670000 |
| 8 | -1.950696000 | 1.423400000  | -1.413266000 |
| 1 | -1.263791000 | 0.757171000  | -1.613991000 |
| 1 | -1.956574000 | 1.371849000  | -0.427786000 |
| 8 | -2.156207000 | -2.370217000 | -1.630014000 |
| 1 | -2.190072000 | -2.601753000 | -0.674762000 |
| 1 | -2.923192000 | -1.765538000 | -1.723504000 |

**15w-V**

|   |              |              |              |
|---|--------------|--------------|--------------|
| 8 | -0.031261000 | -0.658362000 | 1.648590000  |
| 8 | 2.128072000  | -2.377903000 | 1.226776000  |
| 8 | -1.852449000 | 1.268250000  | 1.395396000  |
| 8 | -1.806934000 | 1.413397000  | -1.343186000 |
| 8 | -0.045128000 | -0.696599000 | -1.199107000 |
| 8 | 0.001662000  | 3.495273000  | -1.569244000 |
| 8 | 1.809643000  | 1.271455000  | 1.389703000  |
| 8 | 1.957990000  | 1.372494000  | 1.367665000  |
| 8 | -2.253983000 | -2.353456000 | 1.331619000  |
| 8 | 4.194530000  | -0.315576000 | 1.365192000  |
| 8 | -2.349309000 | -2.553036000 | -1.453330000 |
| 8 | -4.019569000 | -0.330441000 | -1.444758000 |
| 8 | -4.264596000 | -0.234023000 | 1.208920000  |
| 8 | 4.202507000  | -0.359789000 | -1.302036000 |
| 8 | 2.355754000  | -2.435663000 | -1.541707000 |
| 8 | -0.029985000 | 3.471201000  | 1.281476000  |
| 1 | -0.015102000 | -0.860188000 | 2.597107000  |
| 1 | 1.532826000  | -1.968864000 | -1.763172000 |
| 1 | 2.261439000  | -2.557452000 | -0.567730000 |
| 1 | -0.708687000 | 0.025259000  | -1.333200000 |
| 1 | -0.015004000 | -0.792993000 | -0.223008000 |
| 1 | 0.769722000  | 2.898870000  | -1.670645000 |
| 1 | -0.007159000 | 3.649794000  | -0.599242000 |
| 1 | 3.563000000  | 0.364012000  | -1.470844000 |
| 1 | 3.650070000  | -1.156066000 | -1.486397000 |
| 1 | -1.267097000 | 2.207673000  | -1.571356000 |
| 1 | -1.860249000 | 1.453149000  | -0.356917000 |
| 1 | 1.329790000  | -1.814218000 | 1.376754000  |
| 1 | 4.295954000  | -0.328090000 | 0.369647000  |
| 1 | 0.731202000  | 2.885673000  | 1.455894000  |
| 1 | -0.785134000 | 2.877771000  | 1.455755000  |
| 1 | -2.729678000 | 0.870454000  | 1.547545000  |
| 1 | -1.191898000 | 0.524335000  | 1.545489000  |
| 1 | -5.191160000 | -0.164315000 | 1.465359000  |
| 1 | -4.264283000 | -0.253563000 | 0.208480000  |
| 1 | -2.985833000 | -1.724062000 | 1.459380000  |
| 1 | -1.445367000 | -1.795958000 | 1.437085000  |
| 1 | 2.668955000  | 0.856991000  | 1.591458000  |
| 1 | 1.135312000  | 0.538538000  | 1.525269000  |
| 1 | 1.943609000  | 1.437218000  | -0.381665000 |
| 1 | 1.333645000  | 0.629787000  | -1.501272000 |
| 1 | -2.337195000 | -2.645746000 | -0.472859000 |
| 1 | -1.489688000 | -2.123687000 | -1.611981000 |
| 1 | -3.370360000 | 0.376872000  | -1.628664000 |
| 1 | -3.488751000 | -1.155261000 | -1.558584000 |
| 1 | 2.869217000  | -1.781003000 | 1.433729000  |
| 1 | 5.092350000  | -0.292719000 | 1.715466000  |

**OH(H<sub>2</sub>O)<sub>16</sub>**

**16w-I**

|   |              |              |              |
|---|--------------|--------------|--------------|
| 8 | 0.238485000  | -0.339735000 | 1.744030000  |
| 8 | -1.703094000 | -2.188888000 | 1.263651000  |
| 8 | 2.164327000  | -2.099296000 | 1.551968000  |
| 8 | 2.209290000  | 1.507462000  | 1.180946000  |
| 8 | 1.804025000  | 1.635665000  | -1.526194000 |
| 8 | -0.064021000 | -0.222826000 | -1.045394000 |
| 8 | -2.422041000 | -1.886341000 | -1.439278000 |
| 8 | 0.049890000  | 3.763316000  | -1.549843000 |
| 8 | 1.624257000  | -2.503047000 | -1.168128000 |
| 8 | -1.593078000 | 1.788588000  | 1.502121000  |
| 8 | 4.323943000  | -0.280488000 | 0.943755000  |
| 8 | -2.094827000 | 1.816753000  | -1.258872000 |
| 8 | -4.362516000 | 0.251753000  | -1.046571000 |
| 8 | 0.472876000  | 3.807698000  | 1.249126000  |
| 8 | -3.763184000 | -0.121630000 | 1.710848000  |
| 8 | -0.652888000 | -4.181707000 | -0.537315000 |

|   |              |              |              |
|---|--------------|--------------|--------------|
| 8 | 3.723772000  | -0.511694000 | -1.829864000 |
| 1 | 0.082320000  | -0.208695000 | 2.692624000  |
| 1 | 0.191370000  | -3.780853000 | -0.828154000 |
| 1 | -1.300013000 | -3.753626000 | -1.123749000 |
| 1 | -0.959048000 | -1.556076000 | 1.454971000  |
| 1 | -1.472994000 | 1.068933000  | -1.352071000 |
| 1 | -2.981406000 | 1.381109000  | -1.280629000 |
| 1 | 3.051787000  | 0.997268000  | 1.210477000  |
| 1 | 1.519505000  | 0.841908000  | 1.434827000  |
| 1 | 1.406495000  | -1.438040000 | 1.697055000  |
| 1 | 3.775100000  | -1.021466000 | 1.260400000  |
| 1 | 4.259143000  | -0.365793000 | -0.032302000 |
| 1 | -3.089755000 | 0.583024000  | 1.799367000  |
| 1 | -3.230720000 | -0.936511000 | 1.695569000  |
| 1 | -3.903694000 | -0.551775000 | -1.358480000 |
| 1 | -4.317527000 | 0.141457000  | -0.071700000 |
| 1 | -0.286162000 | 3.248594000  | 1.508959000  |
| 1 | 1.225792000  | 3.194610000  | 1.343413000  |
| 1 | 0.172036000  | 3.924336000  | -0.587542000 |
| 1 | -0.811395000 | 3.309977000  | -1.590450000 |
| 1 | -1.803481000 | 1.887213000  | 0.545803000  |
| 1 | -0.930356000 | 1.057963000  | 1.522077000  |
| 1 | -2.307985000 | -1.919554000 | -0.462605000 |
| 1 | -1.657660000 | -1.337967000 | -1.688546000 |
| 1 | 3.097293000  | -1.258801000 | -1.795364000 |
| 1 | 3.149980000  | 0.264770000  | -1.966309000 |
| 1 | 0.993739000  | -1.753990000 | -1.228827000 |
| 1 | 1.898938000  | -2.460563000 | -0.225577000 |
| 1 | 0.630508000  | 0.449110000  | -1.295206000 |
| 1 | -0.050580000 | -0.216181000 | -0.063163000 |
| 1 | 1.265173000  | 2.446314000  | -1.695836000 |
| 1 | 2.019793000  | 1.700401000  | -0.563011000 |
| 1 | 1.992136000  | -2.825754000 | 2.163724000  |
| 1 | -1.270054000 | -2.995984000 | 0.920372000  |

**16w-II**

|   |             |              |              |
|---|-------------|--------------|--------------|
| 1 | 6.301442000 | 3.801797000  | 4.493861000  |
| 8 | 5.473054000 | 4.053975000  | 4.056243000  |
| 8 | 4.995393000 | 6.095049000  | 5.828207000  |
| 1 | 4.454666000 | 5.695069000  | 6.548946000  |
| 1 | 5.157358000 | 5.339693000  | 5.206097000  |
| 8 | 3.521665000 | 2.801055000  | 5.385200000  |
| 1 | 3.564338000 | 1.875887000  | 5.080230000  |
| 1 | 4.287321000 | 3.247485000  | 4.916782000  |
| 8 | 6.238222000 | 8.033627000  | 4.215058000  |
| 1 | 5.398884000 | 8.391239000  | 3.887875000  |
| 1 | 5.941900000 | 7.475213000  | 4.961651000  |
| 8 | 6.713661000 | 5.857919000  | 2.413951000  |
| 1 | 6.255504000 | 5.216708000  | 3.018486000  |
| 1 | 6.751951000 | 6.673710000  | 2.954567000  |
| 8 | 1.056753000 | 5.978678000  | 6.024501000  |
| 1 | 0.909545000 | 5.257966000  | 5.383473000  |
| 1 | 1.589767000 | 6.614135000  | 5.502904000  |
| 8 | 3.531562000 | 0.382699000  | 3.828611000  |
| 1 | 3.373197000 | -0.550058000 | 4.015503000  |
| 1 | 2.728769000 | 0.690838000  | 3.320203000  |
| 8 | 3.182738000 | 4.775905000  | 7.468879000  |
| 1 | 2.378673000 | 5.196001000  | 7.090084000  |
| 1 | 3.246611000 | 3.940483000  | 6.970241000  |
| 8 | 2.976401000 | 7.421998000  | 4.424556000  |
| 1 | 3.684729000 | 7.006256000  | 4.966057000  |
| 1 | 2.948817000 | 6.825439000  | 3.653772000  |
| 8 | 3.328723000 | 5.212847000  | 2.501143000  |
| 1 | 3.759229000 | 5.724332000  | 1.756397000  |
| 1 | 4.085121000 | 4.862042000  | 3.013776000  |
| 8 | 5.349722000 | 2.053954000  | 2.302006000  |
| 1 | 5.386832000 | 2.789510000  | 2.985650000  |
| 1 | 4.962133000 | 1.301260000  | 2.783825000  |
| 8 | 5.000264000 | 4.241795000  | -1.149175000 |
| 1 | 5.813025000 | 3.966609000  | -0.673994000 |
| 1 | 4.311394000 | 3.702507000  | -0.717199000 |
| 8 | 7.156776000 | 3.587906000  | 0.601072000  |
| 1 | 7.232058000 | 4.373813000  | 1.171938000  |
| 1 | 6.722256000 | 2.925734000  | 1.168561000  |
| 8 | 4.683469000 | 6.447000000  | 0.561753000  |
| 1 | 5.507031000 | 6.334739000  | 1.084630000  |
| 1 | 4.776811000 | 5.782802000  | -0.158333000 |
| 8 | 1.340441000 | 3.827118000  | 4.038156000  |
| 1 | 2.085571000 | 3.466915000  | 4.578403000  |

|   |             |             |             |
|---|-------------|-------------|-------------|
| 1 | 1.813133000 | 4.401165000 | 3.405359000 |
| 8 | 3.219313000 | 2.898457000 | 0.765091000 |
| 1 | 4.011828000 | 2.532400000 | 1.227835000 |
| 1 | 3.091186000 | 3.731518000 | 1.262578000 |
| 8 | 1.485993000 | 1.443305000 | 2.461783000 |
| 1 | 1.230132000 | 2.217914000 | 3.006360000 |
| 1 | 1.969063000 | 1.866112000 | 1.718640000 |

**16w-III**

|   |              |              |              |
|---|--------------|--------------|--------------|
| 8 | -0.143886000 | -0.303933000 | 1.708991000  |
| 8 | -2.015397000 | 1.486888000  | 1.083207000  |
| 8 | -2.232329000 | -2.069344000 | 1.537993000  |
| 8 | -1.812646000 | 1.491338000  | -1.661523000 |
| 8 | 1.703992000  | -2.317683000 | 1.356447000  |
| 8 | 2.474820000  | -1.892295000 | -1.298656000 |
| 8 | 0.254058000  | -0.386525000 | -1.043287000 |
| 8 | 4.262955000  | 0.208681000  | -1.146088000 |
| 8 | -1.740650000 | -2.454447000 | -1.119290000 |
| 8 | 1.727995000  | 1.733186000  | 1.484110000  |
| 8 | 1.938665000  | 1.944477000  | -1.319390000 |
| 8 | -0.042224000 | 3.860149000  | -1.487355000 |
| 8 | 3.813488000  | -0.217865000 | 1.629693000  |
| 8 | -0.327711000 | 3.783850000  | 1.326063000  |
| 8 | -4.354708000 | -0.150266000 | 0.983856000  |
| 8 | -3.826257000 | -0.546645000 | -1.617272000 |
| 8 | 0.603631000  | -4.127402000 | -0.623987000 |
| 1 | -0.004223000 | -0.257881000 | 2.667867000  |
| 1 | -3.212156000 | -1.311247000 | -1.590594000 |
| 1 | -3.226750000 | 0.206117000  | -1.805825000 |
| 1 | -4.263732000 | -0.299633000 | 0.002042000  |
| 1 | -5.301110000 | -0.068494000 | 1.147989000  |
| 1 | -1.338232000 | 0.803674000  | 1.374299000  |
| 1 | -2.882189000 | 1.069036000  | 1.240422000  |
| 1 | 1.331377000  | 1.182842000  | -1.392496000 |
| 1 | 1.346930000  | 2.718823000  | -1.481709000 |
| 1 | 0.984560000  | -1.649405000 | 1.502235000  |
| 1 | -3.025722000 | -1.505618000 | 1.552116000  |
| 1 | -1.480313000 | -1.435012000 | 1.676200000  |
| 1 | 0.445589000  | 3.225225000  | 1.542047000  |
| 1 | -1.062723000 | 3.143572000  | 1.379712000  |
| 1 | -0.747984000 | 3.227935000  | -1.719602000 |
| 1 | -0.162960000 | 3.970234000  | -0.517278000 |
| 1 | 3.152554000  | 0.497242000  | 1.743960000  |
| 1 | 3.277371000  | -1.028185000 | 1.681255000  |
| 1 | 4.254386000  | 0.119473000  | -0.168196000 |
| 1 | 3.669942000  | 0.964749000  | -1.308286000 |
| 1 | 1.879661000  | 1.863426000  | 0.521618000  |
| 1 | 1.036356000  | 1.023288000  | 1.518610000  |
| 1 | -1.912905000 | 1.558599000  | -0.679442000 |
| 1 | -1.070045000 | 0.862482000  | -1.730826000 |
| 1 | -0.258745000 | -3.733523000 | -0.864233000 |
| 1 | 1.223943000  | -3.693662000 | -1.231878000 |
| 1 | -1.082151000 | -1.735205000 | -1.210231000 |
| 1 | -1.958619000 | -2.411555000 | -0.152426000 |
| 1 | 1.050569000  | -0.954743000 | -1.227405000 |
| 1 | 0.203516000  | -0.347057000 | -0.061253000 |
| 1 | 3.193100000  | -1.222355000 | -1.397192000 |
| 1 | 2.423985000  | -2.031234000 | -0.326962000 |
| 1 | 1.246361000  | -3.089230000 | 0.967407000  |

**16w-IV**

|   |              |              |              |
|---|--------------|--------------|--------------|
| 1 | 0.065933000  | -0.274282000 | 2.663428000  |
| 8 | 0.186462000  | -0.416110000 | 1.711049000  |
| 8 | 2.177152000  | -2.110219000 | 1.531434000  |
| 1 | 1.392801000  | -1.479536000 | 1.662491000  |
| 1 | 1.996166000  | -2.865444000 | 2.104679000  |
| 8 | 0.328187000  | 3.725233000  | 1.427715000  |
| 1 | 0.267278000  | 3.953834000  | 0.474276000  |
| 1 | 1.098363000  | 3.125747000  | 1.454650000  |
| 8 | -0.576360000 | -4.065418000 | -0.685155000 |
| 1 | -1.226498000 | -3.646011000 | -1.272417000 |
| 1 | 0.269089000  | -3.655585000 | -0.958721000 |
| 8 | -1.697486000 | -2.347873000 | 1.356970000  |
| 1 | -0.973655000 | -1.680119000 | 1.501422000  |
| 1 | -1.251668000 | -3.090607000 | 0.902326000  |
| 8 | 3.897397000  | -0.433384000 | -1.752616000 |
| 1 | 3.290504000  | 0.323878000  | -1.870951000 |
| 1 | 3.290604000  | -1.197744000 | -1.752649000 |
| 8 | 0.077794000  | 3.958780000  | -1.396775000 |

|   |              |              |              |
|---|--------------|--------------|--------------|
| 1 | 0.756549000  | 3.296618000  | -1.632474000 |
| 1 | -0.747579000 | 3.443585000  | -1.480907000 |
| 8 | 4.298672000  | -0.199795000 | 1.048609000  |
| 1 | 3.767447000  | -0.965554000 | 1.333992000  |
| 1 | 4.306595000  | -0.293410000 | 0.070546000  |
| 8 | 1.760052000  | -2.408094000 | -1.222557000 |
| 1 | 1.991106000  | -2.397937000 | -0.267612000 |
| 1 | 1.109900000  | -1.676060000 | -1.284564000 |
| 8 | -0.218541000 | -0.377471000 | -1.094177000 |
| 1 | -1.032652000 | -0.924843000 | -1.256841000 |
| 1 | -0.169876000 | -0.310763000 | -0.116275000 |
| 8 | -1.566460000 | 1.723066000  | 1.444512000  |
| 1 | -0.926121000 | 0.971970000  | 1.497707000  |
| 1 | -0.988522000 | 2.516003000  | 1.568733000  |
| 8 | -4.333964000 | 0.162840000  | -1.160440000 |
| 1 | -4.309745000 | 0.088843000  | -0.182871000 |
| 1 | -3.712535000 | 0.898887000  | -1.326397000 |
| 8 | -3.745791000 | -0.155239000 | 1.620715000  |
| 1 | -3.197080000 | -0.956268000 | 1.680503000  |
| 1 | -3.108907000 | 0.574764000  | 1.739177000  |
| 8 | -2.470632000 | -1.865857000 | -1.298259000 |
| 1 | -2.421591000 | -2.005736000 | -0.327413000 |
| 1 | -3.215985000 | -1.225397000 | -1.398837000 |
| 8 | 2.082570000  | 1.481452000  | 1.112265000  |
| 1 | 2.947112000  | 1.016036000  | 1.197066000  |
| 1 | 1.418066000  | 0.790107000  | 1.365975000  |
| 8 | -2.046787000 | 1.954647000  | -1.263056000 |
| 1 | -1.962279000 | 1.934458000  | -0.278255000 |
| 1 | -1.426691000 | 1.242428000  | -1.502473000 |
| 8 | 1.808317000  | 1.608541000  | -1.623876000 |
| 1 | 1.934473000  | 1.624960000  | -0.642397000 |
| 1 | 1.084747000  | 0.962382000  | -1.715776000 |

#### 16w-V

|   |              |              |              |
|---|--------------|--------------|--------------|
| 8 | -0.167477000 | -0.302656000 | 1.706554000  |
| 8 | -2.036497000 | 1.499934000  | 1.084623000  |
| 8 | -2.254521000 | -2.073427000 | 1.520934000  |
| 8 | 1.704692000  | -2.271196000 | 1.403979000  |
| 8 | 2.499944000  | -1.912818000 | -1.247667000 |
| 8 | 0.248064000  | -0.431567000 | -1.077246000 |
| 8 | 4.352885000  | 0.138198000  | -1.124348000 |
| 8 | -1.786416000 | 1.479415000  | -1.660241000 |
| 8 | -1.725982000 | -2.502973000 | -1.125630000 |
| 8 | 1.578414000  | 1.787692000  | 1.422878000  |
| 8 | -0.337951000 | 3.807816000  | 1.317055000  |
| 8 | 2.046915000  | 1.908009000  | -1.282752000 |
| 8 | 3.744413000  | -0.099499000 | 1.654189000  |
| 8 | -0.073393000 | 3.877085000  | -1.524203000 |
| 8 | -3.787630000 | -0.569938000 | -1.651510000 |
| 8 | -4.365510000 | -0.152892000 | 0.934235000  |
| 8 | 0.638158000  | -4.139972000 | -0.546310000 |
| 1 | -0.053423000 | -0.257963000 | 2.668975000  |
| 1 | -3.178392000 | -1.338072000 | -1.616225000 |
| 1 | -3.183247000 | 0.181845000  | -1.828456000 |
| 1 | -4.255540000 | -0.311302000 | -0.044367000 |
| 1 | -5.315410000 | -0.078112000 | 1.080574000  |
| 1 | -1.366222000 | 0.809813000  | 1.370855000  |
| 1 | -2.905866000 | 1.079593000  | 1.219990000  |
| 1 | 1.966350000  | 1.924994000  | -0.296285000 |
| 1 | 1.442401000  | 1.172203000  | -1.490518000 |
| 1 | 0.967467000  | -1.615213000 | 1.525282000  |
| 1 | -3.047206000 | -1.508470000 | 1.519848000  |
| 1 | -1.503868000 | -1.437969000 | 1.657978000  |
| 1 | -0.270167000 | 3.978615000  | 0.352554000  |
| 1 | -1.082343000 | 3.179076000  | 1.368493000  |
| 1 | 0.752326000  | 3.355437000  | -1.568329000 |
| 1 | -0.748029000 | 3.206215000  | -1.741861000 |
| 1 | 3.109723000  | 0.635624000  | 1.751299000  |
| 1 | 3.190444000  | -0.896398000 | 1.725791000  |
| 1 | 4.315629000  | 0.087112000  | -0.145277000 |
| 1 | 3.727080000  | 0.864214000  | -1.314707000 |
| 1 | 1.013772000  | 2.589178000  | 1.526543000  |
| 1 | 0.927797000  | 1.040723000  | 1.507881000  |
| 1 | -1.899533000 | 1.556698000  | -0.680604000 |
| 1 | -1.042506000 | 0.850022000  | -1.718030000 |
| 1 | -0.225646000 | -3.763773000 | -0.807978000 |
| 1 | 1.261811000  | -3.712228000 | -1.155194000 |
| 1 | -1.957257000 | -2.445176000 | -0.163169000 |
| 1 | -1.064625000 | -1.785963000 | -1.219082000 |

|   |             |              |              |
|---|-------------|--------------|--------------|
| 1 | 1.063699000 | -0.979201000 | -1.234055000 |
| 1 | 0.197681000 | -0.352604000 | -0.099250000 |
| 1 | 3.243494000 | -1.271507000 | -1.349014000 |
| 1 | 2.427499000 | -2.024024000 | -0.273310000 |
| 1 | 1.267245000 | -3.063076000 | 1.033318000  |

#### OH(H<sub>2</sub>O)<sub>17</sub>

##### 17w-I

|   |              |              |              |
|---|--------------|--------------|--------------|
| 1 | -0.008274000 | 0.014845000  | 2.667663000  |
| 8 | 0.073738000  | 0.042828000  | 1.701638000  |
| 8 | 3.964762000  | -0.366974000 | -1.479748000 |
| 1 | 3.442929000  | 0.451183000  | -1.627121000 |
| 1 | 3.300992000  | -1.069210000 | -1.644466000 |
| 8 | 4.176308000  | -0.331568000 | 1.194494000  |
| 1 | 4.194918000  | -0.356144000 | 0.196824000  |
| 1 | 5.093663000  | -0.443654000 | 1.470228000  |
| 8 | 1.786594000  | -1.935333000 | 1.212845000  |
| 1 | 1.151354000  | -1.188196000 | 1.432056000  |
| 1 | 2.666501000  | -1.559040000 | 1.398573000  |
| 8 | -2.162282000 | -1.955427000 | -1.370443000 |
| 1 | -1.441522000 | -1.297631000 | -1.429442000 |
| 1 | -1.687543000 | -2.814183000 | -1.475936000 |
| 8 | -1.624488000 | 2.175406000  | 1.369099000  |
| 1 | -1.023629000 | 2.951496000  | 1.451349000  |
| 1 | -1.012420000 | 1.406484000  | 1.507880000  |
| 8 | 2.135099000  | 1.733624000  | 1.308350000  |
| 1 | 2.927329000  | 1.191455000  | 1.475534000  |
| 1 | 1.374087000  | 1.110494000  | 1.494719000  |
| 8 | 0.392143000  | 4.092901000  | 1.223504000  |
| 1 | 1.140973000  | 3.486506000  | 1.364435000  |
| 1 | 0.344500000  | 4.171644000  | 0.245651000  |
| 8 | -0.260059000 | -3.966230000 | 1.460013000  |
| 1 | -0.957954000 | -3.296308000 | 1.609652000  |
| 1 | 0.558448000  | -3.441561000 | 1.533081000  |
| 8 | -0.468059000 | -4.153154000 | -1.356713000 |
| 1 | 0.342334000  | -3.661614000 | -1.585575000 |
| 1 | -0.399795000 | -4.228810000 | -0.378627000 |
| 8 | -3.970361000 | 0.461220000  | 1.449721000  |
| 1 | -3.419209000 | -0.331696000 | 1.612348000  |
| 1 | -3.338973000 | 1.193240000  | 1.574613000  |
| 8 | -4.102524000 | 0.245217000  | -1.363065000 |
| 1 | -4.198402000 | 0.293355000  | -0.385339000 |
| 1 | -3.669939000 | -0.615853000 | -1.503215000 |
| 8 | -2.073515000 | -1.706722000 | 1.438402000  |
| 1 | -2.194724000 | -1.833080000 | 0.470773000  |
| 1 | -1.306343000 | -1.083194000 | 1.498226000  |
| 8 | 1.684888000  | -2.114940000 | -1.530157000 |
| 1 | 1.730546000  | -2.125317000 | -0.541768000 |
| 1 | 1.039442000  | -1.401405000 | -1.684092000 |
| 8 | 0.171288000  | 3.957414000  | -1.608590000 |
| 1 | 0.885829000  | 3.306317000  | -1.747398000 |
| 1 | -0.639634000 | 3.431227000  | -1.733169000 |
| 8 | 2.086893000  | 1.761698000  | -1.463710000 |
| 1 | 1.333689000  | 1.135489000  | -1.507022000 |
| 1 | 2.170596000  | 1.866345000  | -0.485508000 |
| 8 | -0.162055000 | 0.074937000  | -1.098360000 |
| 1 | -0.828891000 | 0.798974000  | -1.270848000 |
| 1 | -0.102873000 | 0.047939000  | -0.118760000 |
| 8 | -1.984336000 | 2.015846000  | -1.341086000 |
| 1 | -2.806794000 | 1.490463000  | -1.493707000 |
| 1 | -1.973458000 | 2.153485000  | -0.361164000 |

##### 17w-II

|   |              |              |              |
|---|--------------|--------------|--------------|
| 1 | -0.002842000 | 0.018535000  | 2.660210000  |
| 8 | -0.066375000 | -0.040612000 | 1.694266000  |
| 8 | -3.805568000 | -1.136429000 | -1.593465000 |
| 1 | -4.027532000 | -1.194886000 | -0.645381000 |
| 1 | -3.034352000 | -1.735562000 | -1.672505000 |
| 8 | -3.934620000 | -1.086424000 | 1.324625000  |
| 1 | -4.687029000 | -0.985686000 | 1.919781000  |
| 1 | -3.454141000 | -0.212333000 | 1.355648000  |
| 8 | -2.421765000 | 1.117795000  | 1.186768000  |
| 1 | -2.408555000 | 1.238596000  | 0.209789000  |
| 1 | -1.529597000 | 0.703140000  | 1.391163000  |
| 8 | 1.241452000  | 2.606816000  | -1.404790000 |
| 1 | 0.457161000  | 3.195750000  | -1.509548000 |
| 1 | 0.847226000  | 1.713363000  | -1.447050000 |
| 8 | 2.320348000  | -1.381586000 | 1.389413000  |

|   |              |              |              |
|---|--------------|--------------|--------------|
| 1 | 2.053329000  | -2.325359000 | 1.483559000  |
| 1 | 1.464857000  | -0.897156000 | 1.520197000  |
| 8 | -1.333348000 | -2.394537000 | 1.320604000  |
| 1 | -2.267084000 | -2.190275000 | 1.508264000  |
| 1 | -0.865373000 | -1.527181000 | 1.495364000  |
| 8 | 1.174353000  | -3.915051000 | 1.279730000  |
| 1 | 0.250592000  | -3.635922000 | 1.410988000  |
| 1 | 1.252171000  | -3.990327000 | 0.303463000  |
| 8 | -1.252393000 | 3.780255000  | 1.463591000  |
| 1 | -0.341285000 | 3.447383000  | 1.594801000  |
| 1 | -1.784976000 | 2.965901000  | 1.544032000  |
| 8 | -1.201943000 | 3.927084000  | -1.363988000 |
| 1 | -1.784519000 | 3.180821000  | -1.589068000 |
| 1 | -1.283437000 | 3.990274000  | -0.386041000 |
| 8 | 3.852484000  | 1.089564000  | 1.427400000  |
| 1 | 3.041927000  | 1.616661000  | 1.584045000  |
| 1 | 3.546126000  | 0.175009000  | 1.567597000  |
| 8 | 3.882294000  | 1.303248000  | -1.385358000 |
| 1 | 3.990764000  | 1.308665000  | -0.407579000 |
| 1 | 3.159937000  | 1.938431000  | -1.534808000 |
| 8 | 1.284335000  | 2.379319000  | 1.406600000  |
| 1 | 1.337896000  | 2.533191000  | 0.436805000  |
| 1 | 0.799736000  | 1.518641000  | 1.478623000  |
| 8 | -2.314321000 | 1.214158000  | -1.616413000 |
| 1 | -2.933910000 | 0.457047000  | -1.740997000 |
| 1 | -1.434868000 | 0.796808000  | -1.674924000 |
| 8 | 1.339478000  | -3.763383000 | -1.553521000 |
| 1 | 0.432578000  | -3.432947000 | -1.703513000 |
| 1 | 1.892792000  | -2.973453000 | -1.692915000 |
| 8 | -1.262223000 | -2.452660000 | -1.453160000 |
| 1 | -1.317805000 | -2.568684000 | -0.474727000 |
| 1 | -0.799298000 | -1.590784000 | -1.497985000 |
| 8 | 0.191807000  | -0.033920000 | -1.081009000 |
| 1 | 1.079684000  | -0.456245000 | -1.261578000 |
| 1 | 0.135560000  | -0.025806000 | -0.100366000 |
| 8 | 2.606383000  | -1.144751000 | -1.327313000 |
| 1 | 3.164498000  | -0.346534000 | -1.491667000 |
| 1 | 2.646742000  | -1.260170000 | -0.345518000 |

**17w-III**

|   |              |              |              |
|---|--------------|--------------|--------------|
| 1 | -0.029123000 | -0.016749000 | 2.651721000  |
| 8 | -0.099407000 | -0.042590000 | 1.684645000  |
| 8 | -3.944159000 | 0.255525000  | -1.516588000 |
| 1 | -3.406690000 | -0.553950000 | -1.655794000 |
| 1 | -3.292405000 | 0.970218000  | -1.675188000 |
| 8 | -4.191077000 | 0.242288000  | 1.154751000  |
| 1 | -4.196066000 | 0.255390000  | 0.156726000  |
| 1 | -5.114920000 | 0.334772000  | 1.415814000  |
| 8 | -1.844399000 | 1.915481000  | 1.204091000  |
| 1 | -1.197916000 | 1.178551000  | 1.419710000  |
| 1 | -2.717757000 | 1.516999000  | 1.374351000  |
| 8 | 2.215161000  | 1.952652000  | -1.337760000 |
| 1 | 2.219040000  | 1.962908000  | -0.349527000 |
| 1 | 1.503186000  | 1.304677000  | -1.499162000 |
| 8 | 1.671395000  | -2.098746000 | 1.405082000  |
| 1 | 1.105019000  | -2.898526000 | 1.501515000  |
| 1 | 1.020569000  | -1.355867000 | 1.515919000  |
| 8 | -2.114053000 | -1.787296000 | 1.295073000  |
| 1 | -2.919774000 | -1.262509000 | 1.452669000  |
| 1 | -1.370494000 | -1.141455000 | 1.474082000  |
| 8 | -0.281617000 | -4.085510000 | 1.281038000  |
| 1 | -1.052007000 | -3.503140000 | 1.405929000  |
| 1 | -0.226402000 | -4.180466000 | 0.304939000  |
| 8 | 0.161810000  | 4.009368000  | 1.443405000  |
| 1 | 0.214879000  | 4.207099000  | 0.482555000  |
| 1 | -0.655498000 | 3.482795000  | 1.510255000  |
| 8 | 0.345349000  | 4.175011000  | -1.388626000 |
| 1 | 1.087845000  | 3.547705000  | -1.498246000 |
| 1 | -0.427527000 | 3.620883000  | -1.606584000 |
| 8 | 3.919202000  | -0.263253000 | 1.477998000  |
| 1 | 3.382229000  | 0.537431000  | 1.625624000  |
| 1 | 3.288421000  | -0.992033000 | 1.625479000  |
| 8 | 4.174604000  | -0.236781000 | -1.346188000 |
| 1 | 4.245337000  | -0.244989000 | -0.366218000 |
| 1 | 3.681438000  | 0.590411000  | -1.507562000 |
| 8 | 1.905049000  | 1.826262000  | 1.408965000  |
| 1 | 1.421059000  | 2.671633000  | 1.556486000  |
| 1 | 1.185581000  | 1.149167000  | 1.495834000  |
| 8 | -1.706970000 | 2.059381000  | -1.539572000 |

|   |              |              |              |
|---|--------------|--------------|--------------|
| 1 | -1.765305000 | 2.078876000  | -0.551924000 |
| 1 | -1.046541000 | 1.356646000  | -1.682496000 |
| 8 | -0.053167000 | -3.994880000 | -1.551442000 |
| 1 | -0.784913000 | -3.368478000 | -1.712086000 |
| 1 | 0.743867000  | -3.447973000 | -1.677843000 |
| 8 | -2.036751000 | -1.849551000 | -1.476605000 |
| 1 | -2.128872000 | -1.944526000 | -0.498301000 |
| 1 | -1.295429000 | -1.208733000 | -1.520580000 |
| 8 | 0.163398000  | -0.103595000 | -1.137295000 |
| 1 | 0.859457000  | -0.804447000 | -1.285191000 |
| 1 | 0.106357000  | -0.047134000 | -0.159482000 |
| 8 | 2.048087000  | -1.998697000 | -1.303996000 |
| 1 | 2.877271000  | -1.484036000 | -1.458280000 |
| 1 | 2.026430000  | -2.111719000 | -0.320951000 |

**17w-IV**

|   |              |              |              |
|---|--------------|--------------|--------------|
| 1 | -0.007538000 | 0.049573000  | 2.675596000  |
| 8 | 0.070525000  | 0.048769000  | 1.709030000  |
| 8 | 3.858170000  | -1.179693000 | -1.558681000 |
| 1 | 3.065970000  | -1.746900000 | -1.652671000 |
| 1 | 4.044203000  | -1.208992000 | -0.601827000 |
| 8 | 3.945476000  | -0.968428000 | 1.360300000  |
| 1 | 4.686740000  | -0.897106000 | 1.973169000  |
| 1 | 3.476963000  | -0.089062000 | 1.406573000  |
| 8 | 1.361715000  | -2.237896000 | 1.235198000  |
| 1 | 0.885101000  | -1.379759000 | 1.447982000  |
| 1 | 2.292760000  | -2.041014000 | 1.444483000  |
| 8 | -2.490364000 | -1.500581000 | -1.359202000 |
| 1 | -1.652752000 | -0.999551000 | -1.413411000 |
| 1 | -2.195720000 | -2.437165000 | -1.461027000 |
| 8 | -1.187408000 | 2.471862000  | 1.351767000  |
| 1 | -0.449593000 | 3.118888000  | 1.435790000  |
| 1 | -0.735808000 | 1.601053000  | 1.501016000  |
| 8 | 2.447822000  | 1.257872000  | 1.247793000  |
| 1 | 2.467155000  | 1.334810000  | 0.265502000  |
| 1 | 1.556868000  | 0.843872000  | 1.438763000  |
| 8 | 1.173606000  | 3.948787000  | 1.225509000  |
| 1 | 1.755419000  | 3.183776000  | 1.389835000  |
| 1 | 1.167270000  | 4.006526000  | 0.245193000  |
| 8 | -1.045869000 | -3.825018000 | 1.485827000  |
| 1 | -1.597863000 | -3.029883000 | 1.630777000  |
| 1 | -0.139831000 | -3.472637000 | 1.559106000  |
| 8 | -1.272450000 | -3.990825000 | -1.331483000 |
| 1 | -0.379112000 | -3.672923000 | -1.559160000 |
| 1 | -1.224988000 | -4.071341000 | -0.352649000 |
| 8 | -3.820612000 | 1.246448000  | 1.404350000  |
| 1 | -3.436885000 | 0.363753000  | 1.584324000  |
| 1 | -3.061676000 | 1.843609000  | 1.536181000  |
| 8 | -3.943145000 | 1.042952000  | -1.409901000 |
| 1 | -4.044553000 | 1.116144000  | -0.434271000 |
| 1 | -3.690327000 | 0.111249000  | -1.538143000 |
| 8 | -2.380841000 | -1.250703000 | 1.448662000  |
| 1 | -2.514091000 | -1.360005000 | 0.480426000  |
| 1 | -1.507353000 | -0.789061000 | 1.513579000  |
| 8 | 1.240277000  | -2.422090000 | -1.508155000 |
| 1 | 1.282518000  | -2.432376000 | -0.520150000 |
| 1 | 0.751974000  | -1.595212000 | -1.669150000 |
| 8 | 1.017086000  | 3.757591000  | -1.609368000 |
| 1 | 1.606833000  | 3.004456000  | -1.792499000 |
| 1 | 0.124215000  | 3.396799000  | -1.759803000 |
| 8 | 2.391212000  | 1.195900000  | -1.547352000 |
| 1 | 3.020957000  | 0.454514000  | -1.697636000 |
| 1 | 1.520592000  | 0.745202000  | -1.504404000 |
| 8 | -0.139648000 | 0.102641000  | -1.066434000 |
| 1 | -0.643976000 | 0.944164000  | -1.257464000 |
| 1 | -0.106815000 | 0.070974000  | -0.085322000 |
| 8 | -1.523401000 | 2.366602000  | -1.366553000 |
| 1 | -2.429663000 | 2.008862000  | -1.531100000 |
| 1 | -1.504194000 | 2.511243000  | -0.388051000 |

**17w-V**

|   |              |             |              |
|---|--------------|-------------|--------------|
| 1 | -0.001711000 | 0.033347000 | 2.650935000  |
| 8 | 0.105954000  | 0.026778000 | 1.686967000  |
| 8 | -0.509397000 | 4.048321000 | -1.483522000 |
| 1 | 0.340308000  | 3.609116000 | -1.675506000 |
| 1 | -0.451304000 | 4.184037000 | -0.511071000 |
| 8 | -0.287145000 | 4.024882000 | 1.334430000  |
| 1 | -0.958668000 | 3.325373000 | 1.479848000  |
| 1 | 0.551806000  | 3.550242000 | 1.472265000  |

|   |              |              |              |   |              |              |              |
|---|--------------|--------------|--------------|---|--------------|--------------|--------------|
| 8 | 1.865468000  | 2.028284000  | 1.303676000  | 1 | 4.526500000  | 1.687724000  | -0.556556000 |
| 1 | 2.734264000  | 1.615879000  | 1.459019000  | 1 | -3.603929000 | -2.909274000 | -1.140145000 |
| 1 | 1.215456000  | 1.285719000  | 1.474152000  | 1 | -4.388854000 | -1.789435000 | -0.437965000 |
| 8 | 1.986505000  | -1.902105000 | -1.368648000 | 1 | 0.956112000  | 2.833683000  | -1.497986000 |
| 1 | 1.472306000  | -2.721448000 | -1.578562000 | 1 | 0.154750000  | 1.725890000  | -0.746225000 |
| 1 | 2.094715000  | -1.941037000 | -0.386708000 | 1 | 1.184562000  | 0.021054000  | 2.183747000  |
| 8 | -1.743966000 | -2.001351000 | 1.346081000  | 1 | 1.109445000  | -0.002954000 | 0.628199000  |
| 1 | -2.599984000 | -1.555883000 | 1.554592000  | 1 | -3.563702000 | 3.110240000  | 0.322277000  |
| 1 | -1.080983000 | -1.273909000 | 1.464855000  | 1 | -3.498566000 | 2.931205000  | -1.189335000 |
| 8 | -2.025877000 | 1.755145000  | 1.338599000  | 1 | 3.092300000  | 2.769295000  | -2.010900000 |
| 1 | -2.154350000 | 1.788906000  | 0.365191000  | 1 | 2.253174000  | 1.737199000  | -2.760035000 |
| 1 | -1.264725000 | 1.129341000  | 1.445149000  | 1 | 4.263676000  | -1.219719000 | -0.335519000 |
| 8 | -3.980187000 | -0.379342000 | 1.592593000  | 1 | 3.460751000  | -0.183674000 | 0.469054000  |
| 1 | -3.453457000 | 0.439369000  | 1.685048000  | 1 | -0.916872000 | -2.891364000 | 3.078207000  |
| 1 | -4.219012000 | -0.356161000 | 0.640866000  | 1 | 0.611379000  | -2.951990000 | 3.011790000  |
| 8 | 4.194375000  | 0.293818000  | 1.163582000  | 1 | -3.008425000 | -0.056733000 | -1.790640000 |
| 1 | 5.132298000  | 0.356784000  | 1.379347000  | 1 | -1.065526000 | 3.204804000  | 0.565406000  |
| 1 | 4.155430000  | 0.269888000  | 0.167559000  | 1 | -1.114702000 | 3.185890000  | 2.106139000  |
| 8 | 3.852323000  | 0.240316000  | -1.502330000 | 1 | 1.211175000  | -3.093351000 | -1.705616000 |
| 1 | 3.214429000  | 0.972570000  | -1.644249000 | 1 | 1.987235000  | -2.043175000 | -2.494386000 |
| 1 | 3.325928000  | -0.562933000 | -1.682184000 | 1 | -4.300358000 | 1.063717000  | -0.384265000 |
| 8 | 0.314225000  | -3.991733000 | 1.278017000  | 1 | -3.339952000 | 0.121046000  | 0.326554000  |
| 1 | 1.034830000  | -3.366205000 | 1.473513000  | 1 | -1.869828000 | 1.338431000  | 1.367151000  |
| 1 | -0.490176000 | -3.468269000 | 1.459578000  | 1 | -1.128745000 | 0.225487000  | 0.557811000  |
| 8 | 0.257971000  | -4.022886000 | -1.554536000 | 1 | 3.531234000  | -3.188700000 | -0.333299000 |
| 1 | 0.272620000  | -4.170451000 | -0.582926000 | 1 | 3.461380000  | -3.122894000 | -1.181499000 |
| 1 | -0.580433000 | -3.536146000 | -1.676264000 | 1 | -2.162833000 | 1.862513000  | -2.727157000 |
| 8 | 2.116350000  | -1.694193000 | 1.362490000  | 1 | -1.322479000 | 2.890397000  | -1.968393000 |
| 1 | 2.929307000  | -1.177172000 | 1.509121000  | 1 | 2.847470000  | -0.167456000 | -1.661577000 |
| 1 | 1.374915000  | -1.036905000 | 1.525922000  | 1 | 1.303570000  | -0.090329000 | -1.721066000 |
| 8 | 1.764877000  | 2.180035000  | -1.468145000 | 1 | -2.229572000 | -1.485161000 | 1.678143000  |
| 1 | 1.852213000  | 2.262760000  | -0.488465000 | 1 | -2.978432000 | -2.661873000 | 1.023055000  |
| 1 | 1.102558000  | 1.459939000  | -1.519283000 | 1 | 0.960219000  | 3.040256000  | 2.818852000  |
| 8 | -4.209993000 | -0.266095000 | -1.250384000 | 1 | 0.159628000  | 2.066994000  | 3.690802000  |
| 1 | -3.715725000 | 0.547941000  | -1.453561000 | 1 | 1.495910000  | 2.932182000  | 0.589394000  |
| 1 | -3.562142000 | -0.970170000 | -1.451062000 | 1 | 2.160912000  | 1.829202000  | 1.386730000  |
| 8 | -2.117475000 | 1.796990000  | -1.496143000 | 1 | -1.318191000 | -2.903577000 | -1.727345000 |
| 1 | -1.652442000 | 2.663294000  | -1.598733000 | 1 | -0.145257000 | -1.581701000 | -0.473696000 |
| 1 | -1.399222000 | 1.148740000  | -1.606914000 | 1 | -0.917379000 | -2.652872000 | 0.359654000  |
| 8 | 0.043746000  | -0.048266000 | -1.116461000 | 1 | -2.253781000 | -1.019979000 | -2.736231000 |
| 1 | 0.755915000  | -0.720918000 | -1.292609000 | 1 | -1.743913000 | -3.567210000 | -3.064480000 |
| 1 | 0.000258000  | -0.017619000 | -0.136070000 |   |              |              |              |
| 8 | -1.964437000 | -2.114195000 | -1.410963000 |   |              |              |              |
| 1 | -1.947316000 | -2.183256000 | -0.425112000 |   |              |              |              |
| 1 | -1.334249000 | -1.380007000 | -1.540110000 |   |              |              |              |

### OH(H<sub>2</sub>O)<sub>23</sub>

#### 23w-I

|   |              |              |              |
|---|--------------|--------------|--------------|
| 8 | -0.096476000 | 0.021597000  | -0.661042000 |
| 8 | -1.791831000 | 0.352251000  | 1.315817000  |
| 8 | -0.243889000 | -2.586188000 | -0.359438000 |
| 8 | 0.249010000  | 2.717149000  | -0.806878000 |
| 8 | 2.297614000  | 2.698097000  | -2.583948000 |
| 8 | -1.687825000 | 3.089625000  | 1.309251000  |
| 8 | 0.163016000  | 2.991058000  | 3.384853000  |
| 8 | 2.102433000  | -0.183936000 | -2.301731000 |
| 8 | -4.064833000 | 0.105289000  | -0.334152000 |
| 8 | -2.311394000 | -0.080137000 | -2.486036000 |
| 8 | -4.122934000 | 2.856310000  | -0.431505000 |
| 8 | -2.174838000 | 2.791631000  | -2.434821000 |
| 8 | -2.204971000 | -2.457933000 | 1.602079000  |
| 8 | -4.143841000 | -2.730847000 | -0.348837000 |
| 8 | -0.004276000 | 0.040586000  | 3.427846000  |
| 8 | 1.756147000  | -0.013596000 | 1.371065000  |
| 8 | -0.122553000 | -2.731592000 | 3.619309000  |
| 8 | -2.046794000 | -2.940537000 | -2.395423000 |
| 8 | 4.356292000  | 2.643576000  | -0.637391000 |
| 8 | 1.890084000  | -2.887431000 | 1.514115000  |
| 8 | 2.155205000  | 2.805403000  | 1.307093000  |
| 8 | 4.088168000  | -0.249733000 | -0.272848000 |
| 8 | 4.096987000  | -3.014312000 | -0.441489000 |
| 8 | 1.951663000  | -3.011416000 | -2.328616000 |
| 1 | -0.780020000 | 0.036868000  | -1.366780000 |
| 1 | -0.044606000 | -0.908312000 | 3.692986000  |
| 1 | -0.749476000 | 0.128806000  | 2.791366000  |
| 1 | 1.212107000  | -2.964799000 | 0.809819000  |
| 1 | 2.006474000  | -1.916285000 | 1.545966000  |
| 1 | 3.774108000  | 2.830631000  | 0.123213000  |

#### 23w-II

|   |              |              |              |
|---|--------------|--------------|--------------|
| 8 | -0.114582000 | 0.019308000  | -0.677596000 |
| 8 | -1.819225000 | 0.023246000  | 1.319511000  |
| 8 | 0.135727000  | -2.674060000 | -0.596543000 |
| 8 | -0.075464000 | 2.671019000  | -0.655078000 |
| 8 | 1.984964000  | 3.065884000  | -2.331405000 |
| 8 | -1.914691000 | 2.778191000  | 1.555344000  |
| 8 | -0.112747000 | 2.598198000  | 3.650056000  |
| 8 | 2.100720000  | 0.216604000  | -2.296711000 |
| 8 | -4.133557000 | -0.192872000 | -0.290098000 |
| 8 | -2.388275000 | -0.002929000 | -2.461366000 |
| 8 | -4.278188000 | 2.611306000  | -0.158636000 |
| 8 | -2.283848000 | 2.876400000  | -2.251594000 |
| 8 | -1.915562000 | -2.857776000 | 1.308641000  |
| 8 | -3.911672000 | -3.088298000 | -0.545755000 |
| 8 | -0.020044000 | -0.338671000 | 3.413551000  |
| 8 | 1.722474000  | -0.003992000 | 1.371162000  |
| 8 | 0.148247000  | -3.098820000 | 3.327901000  |
| 8 | -2.019630000 | -2.831685000 | -2.615647000 |
| 8 | 4.038484000  | 3.075143000  | -0.398265000 |
| 8 | 2.221893000  | -2.870611000 | 1.292400000  |
| 8 | 1.834559000  | 2.804334000  | 1.526273000  |
| 8 | 4.068600000  | 0.166694000  | -0.259857000 |
| 8 | 4.442503000  | -2.532649000 | -0.623735000 |
| 8 | 2.403558000  | -2.614370000 | -2.571908000 |
| 1 | -0.809969000 | -0.043160000 | -1.368001000 |
| 1 | 0.039303000  | -1.310675000 | 3.578345000  |
| 1 | -0.771494000 | -0.262877000 | 2.783365000  |
| 1 | 1.566922000  | -2.953181000 | 0.563217000  |
| 1 | 2.233129000  | -1.901598000 | 1.414138000  |
| 1 | 3.448336000  | 3.127158000  | 0.376976000  |
| 1 | 4.309340000  | 2.138390000  | -0.401409000 |
| 1 | -3.337968000 | -3.065161000 | -1.344651000 |
| 1 | -4.302181000 | -2.196916000 | -0.525242000 |
| 1 | 0.666192000  | 2.915441000  | -1.279308000 |
| 1 | -0.056082000 | 1.660068000  | -0.655292000 |
| 1 | 1.155297000  | -0.119164000 | 2.179865000  |

|   |              |              |              |
|---|--------------|--------------|--------------|
| 1 | 1.078844000  | -0.040841000 | 0.626389000  |
| 1 | -3.680888000 | 2.803313000  | 0.586687000  |
| 1 | -3.725163000 | 2.826759000  | -0.933056000 |
| 1 | 2.769138000  | 3.189086000  | -1.750700000 |
| 1 | 2.056143000  | 2.117772000  | -2.572390000 |
| 1 | 4.366504000  | -0.768262000 | -0.390324000 |
| 1 | 3.435990000  | 0.095683000  | 0.477133000  |
| 1 | -0.615039000 | -3.286965000 | 2.750870000  |
| 1 | 0.914101000  | -3.194053000 | 2.726876000  |
| 1 | -3.078255000 | -0.082775000 | -1.763395000 |
| 1 | -1.274713000 | 2.967881000  | 0.842483000  |
| 1 | -1.372291000 | 2.826307000  | 2.378778000  |
| 1 | 1.618994000  | -2.902619000 | -2.076971000 |
| 1 | 2.263779000  | -1.648644000 | -2.665048000 |
| 1 | -4.412467000 | 0.748188000  | -0.241155000 |
| 1 | -3.394774000 | -0.214539000 | 0.354492000  |
| 1 | -1.967108000 | 0.988730000  | 1.463240000  |
| 1 | -1.153279000 | 0.013288000  | 0.553062000  |
| 1 | 3.902013000  | -2.853622000 | 0.121663000  |
| 1 | 3.827546000  | -2.651344000 | -1.381911000 |
| 1 | -1.458117000 | 2.887928000  | -1.702542000 |
| 1 | 2.833122000  | 0.231472000  | -1.641068000 |
| 1 | 1.290075000  | 0.141577000  | -1.729500000 |
| 1 | -2.019584000 | -1.904363000 | 1.480419000  |
| 1 | -2.695334000 | -3.063071000 | 0.732550000  |
| 1 | 0.671786000  | 2.771335000  | 3.091645000  |
| 1 | -0.037261000 | 1.650204000  | 3.860695000  |
| 1 | 1.169330000  | 2.939625000  | 0.820696000  |
| 1 | 1.922537000  | 1.826471000  | 1.515267000  |
| 1 | -2.077668000 | -1.885493000 | -2.842916000 |
| 1 | -1.195695000 | -2.885791000 | -2.097069000 |
| 1 | 0.098478000  | -1.675949000 | -0.637266000 |
| 1 | -0.576133000 | -2.873793000 | 0.054622000  |
| 1 | -2.385033000 | 0.948309000  | -2.672098000 |
| 1 | -2.154364000 | 3.573118000  | -2.907305000 |

**23w-III**

|   |              |              |              |
|---|--------------|--------------|--------------|
| 1 | -0.826315000 | 0.038936000  | -1.341010000 |
| 8 | -0.125337000 | -0.042204000 | -0.658628000 |
| 8 | 0.217313000  | 0.260605000  | 3.437103000  |
| 1 | 0.285667000  | 1.231389000  | 3.603632000  |
| 1 | 0.903298000  | 0.105313000  | 2.753498000  |
| 8 | -1.739701000 | 3.049807000  | 1.383352000  |
| 1 | -1.091553000 | 3.061992000  | 0.643349000  |
| 1 | -1.868317000 | 2.086100000  | 1.496562000  |
| 8 | -4.324984000 | -2.467128000 | -0.300674000 |
| 1 | -3.728729000 | -2.616807000 | 0.462889000  |
| 1 | -4.487464000 | -1.504162000 | -0.265829000 |
| 8 | 4.305038000  | 2.599120000  | -0.647459000 |
| 1 | 3.716878000  | 2.688051000  | -1.431687000 |
| 1 | 4.564670000  | 1.660396000  | -0.670065000 |
| 8 | -0.331373000 | -2.697579000 | -0.621156000 |
| 1 | -1.030668000 | -2.884188000 | -1.282472000 |
| 1 | -0.235485000 | -1.692227000 | -0.649132000 |
| 8 | -1.687397000 | 0.169287000  | 1.466030000  |
| 1 | -1.083089000 | 0.205649000  | 2.248683000  |
| 1 | -1.067715000 | 0.103264000  | 0.665301000  |
| 8 | 4.043943000  | -3.063824000 | -0.350116000 |
| 1 | 3.488767000  | -3.216708000 | 0.432697000  |
| 1 | 3.401362000  | -3.167136000 | -1.088505000 |
| 8 | -2.594157000 | -2.836522000 | -2.311178000 |
| 1 | -3.311278000 | -2.774692000 | -1.621093000 |
| 1 | -2.876133000 | -3.526398000 | -2.923834000 |
| 8 | -4.010678000 | 0.357608000  | -0.126565000 |
| 1 | -4.185797000 | 1.327415000  | -0.235013000 |
| 1 | -3.333105000 | 0.330811000  | 0.576037000  |
| 8 | 0.395447000  | 3.021972000  | 3.356519000  |
| 1 | 1.160342000  | 3.127007000  | 2.761275000  |
| 1 | -0.370101000 | 3.206075000  | 2.775545000  |
| 8 | 2.077120000  | -0.182896000 | -2.391072000 |
| 1 | 1.293948000  | -0.121205000 | -1.789080000 |
| 1 | 2.845490000  | -0.195153000 | -1.778136000 |
| 8 | 1.641421000  | -2.981270000 | 1.463203000  |
| 1 | 0.990538000  | -3.150628000 | 0.756291000  |
| 1 | 1.099526000  | -2.987242000 | 2.288595000  |
| 8 | -2.028757000 | 2.885651000  | -2.453329000 |
| 1 | -1.190341000 | 2.990589000  | -1.972955000 |
| 1 | -2.053360000 | 1.937540000  | -2.678598000 |
| 8 | 4.149029000  | -0.286312000 | -0.458329000 |

|   |              |              |              |
|---|--------------|--------------|--------------|
| 1 | 4.320702000  | -1.256929000 | -0.444345000 |
| 1 | 3.460111000  | -0.199480000 | 0.229489000  |
| 8 | 1.828554000  | -0.281384000 | 1.194065000  |
| 1 | 1.856148000  | -1.266008000 | 1.316307000  |
| 1 | 1.146991000  | -0.167933000 | 0.489568000  |
| 8 | -4.019868000 | 3.069159000  | -0.451752000 |
| 1 | -3.417858000 | 3.105079000  | -1.227421000 |
| 1 | -3.409976000 | 3.286382000  | 0.278967000  |
| 8 | 2.041838000  | -3.040881000 | -2.316881000 |
| 1 | 2.071611000  | -2.091217000 | -2.557721000 |
| 1 | 1.223165000  | -3.087442000 | -1.789460000 |
| 8 | -2.403001000 | 0.048164000  | -2.383058000 |
| 1 | -2.459754000 | -0.881994000 | -2.664963000 |
| 1 | -3.033191000 | 0.109563000  | -1.628749000 |
| 8 | 2.374137000  | 2.566433000  | 1.273950000  |
| 1 | 2.357205000  | 1.605204000  | 1.426118000  |
| 1 | 3.151074000  | 2.682093000  | 0.667003000  |
| 8 | -0.093404000 | -2.650839000 | 3.599334000  |
| 1 | -0.922028000 | -2.717136000 | 3.084604000  |
| 1 | -0.041182000 | -1.705542000 | 3.829592000  |
| 8 | -2.163136000 | -2.570241000 | 1.564569000  |
| 1 | -1.517125000 | -2.770202000 | 0.852756000  |
| 1 | -2.106783000 | -1.587057000 | 1.595165000  |
| 8 | 2.350851000  | 2.653982000  | -2.674767000 |
| 1 | 2.259474000  | 1.688563000  | -2.811952000 |
| 1 | 1.571214000  | 2.849866000  | -2.124548000 |
| 8 | 0.261526000  | 2.638496000  | -0.558469000 |
| 1 | 0.147376000  | 1.645831000  | -0.601132000 |
| 1 | 1.016398000  | 2.740751000  | 0.066253000  |

**23w-IV**

|   |              |              |              |
|---|--------------|--------------|--------------|
| 8 | -0.114749000 | -0.003518000 | -0.691991000 |
| 8 | -1.806586000 | 0.184452000  | 1.278363000  |
| 8 | -0.103538000 | -2.657189000 | -0.601407000 |
| 8 | 0.225814000  | 2.707798000  | -0.656918000 |
| 8 | 2.282856000  | 2.877164000  | -2.404520000 |
| 8 | -1.670090000 | 2.913078000  | 1.462433000  |
| 8 | 0.123185000  | 2.718058000  | 3.562905000  |
| 8 | 2.125787000  | -0.007837000 | -2.308753000 |
| 8 | -4.159313000 | 0.043374000  | -0.201657000 |
| 8 | -2.413248000 | 0.245618000  | -2.428378000 |
| 8 | -4.039265000 | 2.986372000  | -0.203961000 |
| 8 | -2.170857000 | 2.985113000  | -2.368715000 |
| 8 | -2.135341000 | -2.640220000 | 1.397507000  |
| 8 | -4.143164000 | -2.800202000 | -0.570702000 |
| 8 | -0.030510000 | -0.229352000 | 3.403208000  |
| 8 | 1.734349000  | -0.104366000 | 1.344627000  |
| 8 | -0.037668000 | -3.006982000 | 3.391900000  |
| 8 | -2.306206000 | -2.533010000 | -2.479066000 |
| 8 | 4.331708000  | 2.742515000  | -0.447797000 |
| 8 | 1.971391000  | -2.975808000 | 1.309794000  |
| 8 | 2.105070000  | 2.708952000  | 1.479626000  |
| 8 | 4.096726000  | -0.158458000 | -0.269434000 |
| 8 | 4.237185000  | -2.895095000 | -0.590530000 |
| 8 | 2.194745000  | -2.838326000 | -2.539567000 |
| 1 | -0.811865000 | 0.065002000  | -1.380825000 |
| 1 | -0.032321000 | -1.196767000 | 3.595996000  |
| 1 | -0.773671000 | -0.123312000 | 2.768863000  |
| 1 | 1.325390000  | -3.033125000 | 0.572061000  |
| 1 | 2.057225000  | -2.005262000 | 1.396962000  |
| 1 | 3.740376000  | 2.868630000  | 0.317881000  |
| 1 | 4.511857000  | 1.784835000  | -0.429155000 |
| 1 | -3.505445000 | -2.752692000 | -1.340907000 |
| 1 | 0.938147000  | 2.888730000  | -1.329865000 |
| 1 | 0.132275000  | 1.715388000  | -0.680282000 |
| 1 | 1.160585000  | -0.136594000 | 2.154422000  |
| 1 | 1.089849000  | -0.066716000 | 0.600312000  |
| 1 | -3.414343000 | 3.059226000  | 0.539872000  |
| 1 | 3.072588000  | 2.928287000  | -1.822696000 |
| 1 | 2.257942000  | 1.928053000  | -2.640979000 |
| 1 | 4.314365000  | -1.116032000 | -0.385137000 |
| 1 | 3.458463000  | -0.162150000 | 0.465697000  |
| 1 | -0.827417000 | -3.147861000 | 2.840145000  |
| 1 | 0.701278000  | -3.158354000 | 2.767336000  |
| 1 | -3.097145000 | 0.233506000  | -1.726474000 |
| 1 | -1.031359000 | 3.070934000  | 0.738843000  |
| 1 | -1.121178000 | 2.969962000  | 2.280696000  |
| 1 | 1.387535000  | -3.045176000 | -2.041029000 |
| 1 | 2.145066000  | -1.863182000 | -2.640974000 |



|   |              |              |              |
|---|--------------|--------------|--------------|
| 1 | -3.384321000 | 0.016443000  | 0.402771000  |
| 1 | -1.859352000 | 1.165028000  | 1.408008000  |
| 1 | -1.135880000 | 0.103051000  | 0.511339000  |
| 1 | 3.668327000  | -3.145260000 | 0.160712000  |
| 1 | 3.613965000  | -2.972682000 | -1.346765000 |
| 1 | -1.340389000 | 3.058766000  | -1.862241000 |
| 1 | 2.854745000  | -0.019755000 | -1.650225000 |
| 1 | 1.309040000  | 0.005942000  | -1.747699000 |
| 1 | -2.165784000 | -1.670367000 | 1.506551000  |
| 1 | -2.931820000 | -2.843038000 | 0.866170000  |
| 1 | 0.919678000  | 2.815282000  | 3.001193000  |
| 1 | 0.128102000  | 1.774348000  | 3.801756000  |
| 1 | 1.455213000  | 2.868011000  | 0.759676000  |
| 1 | 2.129867000  | 1.729680000  | 1.489382000  |
| 1 | -2.283247000 | -1.581616000 | -2.712240000 |
| 1 | -1.459227000 | -2.676545000 | -2.011943000 |
| 1 | -0.058024000 | -1.649169000 | -0.643970000 |
| 1 | -0.793328000 | -2.799226000 | 0.081868000  |
| 1 | -2.310872000 | 1.208620000  | -2.618452000 |
| 1 | -2.862602000 | 3.110934000  | -1.685372000 |
| 1 | -4.330606000 | 2.058772000  | -0.176883000 |
| 1 | -4.435519000 | -0.888156000 | -0.281584000 |
| 1 | -4.792397000 | -3.471444000 | -0.812368000 |

**23w-V**

|   |              |              |              |
|---|--------------|--------------|--------------|
| 1 | -0.821748000 | -0.048255000 | -1.315699000 |
| 8 | -0.132925000 | -0.020552000 | -0.616075000 |
| 8 | 0.103529000  | -0.057395000 | 3.468549000  |
| 1 | 0.068579000  | 0.895490000  | 3.716991000  |
| 1 | 0.812112000  | -0.083916000 | 2.790615000  |
| 8 | -2.138264000 | 2.670288000  | 1.585589000  |
| 1 | -1.445292000 | 2.777848000  | 0.895354000  |
| 1 | -2.170505000 | 1.692420000  | 1.651383000  |
| 8 | -4.059024000 | -2.948283000 | -0.618391000 |
| 1 | -3.460199000 | -3.094832000 | 0.139488000  |
| 1 | -4.328622000 | -2.018718000 | -0.512400000 |
| 8 | 3.877685000  | 3.081689000  | -0.428798000 |
| 1 | 3.290098000  | 3.169125000  | -1.210742000 |
| 1 | 4.242066000  | 2.181509000  | -0.518535000 |
| 8 | 0.031947000  | -2.743798000 | -0.810196000 |
| 1 | -0.666422000 | -2.904929000 | -1.499157000 |
| 1 | 0.020233000  | -1.750689000 | -0.728816000 |
| 8 | -1.773181000 | -0.159484000 | 1.464392000  |
| 1 | -1.188761000 | -0.149275000 | 2.262245000  |
| 1 | -1.130824000 | -0.099639000 | 0.683850000  |
| 8 | 4.388024000  | -2.532228000 | -0.496802000 |
| 1 | 3.861603000  | -2.828439000 | 0.264474000  |
| 1 | 3.765448000  | -2.664713000 | -1.249100000 |
| 8 | -2.034245000 | -2.853360000 | -2.571953000 |
| 1 | -2.817805000 | -2.953764000 | -1.986256000 |
| 1 | -2.085181000 | -1.919111000 | -2.841613000 |
| 8 | -4.057932000 | -0.047200000 | -0.211941000 |
| 1 | -4.311308000 | 0.903321000  | -0.254040000 |
| 1 | -3.409424000 | -0.079514000 | 0.516892000  |
| 8 | -0.016100000 | 2.724366000  | 3.611146000  |
| 1 | 0.731946000  | 2.958247000  | 3.032085000  |
| 1 | -0.798100000 | 2.874610000  | 3.044798000  |
| 8 | 2.051556000  | 0.231017000  | -2.360148000 |
| 1 | 1.272480000  | 0.134100000  | -1.757814000 |
| 1 | 2.817250000  | 0.250535000  | -1.743842000 |
| 8 | 1.982446000  | -2.934012000 | 1.283492000  |
| 1 | 1.373454000  | -3.128888000 | 0.544769000  |
| 1 | 1.427247000  | -3.082289000 | 2.086122000  |
| 8 | -1.972739000 | 2.940745000  | -2.273271000 |
| 1 | -1.244134000 | 2.977067000  | -1.617097000 |
| 1 | -1.660154000 | 3.483324000  | -3.008805000 |
| 8 | 4.098302000  | 0.216661000  | -0.403751000 |
| 1 | 4.405925000  | -0.719559000 | -0.461522000 |
| 1 | 3.402583000  | 0.147875000  | 0.279784000  |
| 8 | 1.814645000  | -0.229544000 | 1.237212000  |
| 1 | 1.976502000  | -1.209256000 | 1.288358000  |
| 1 | 1.126503000  | -0.162243000 | 0.532398000  |
| 8 | -4.242419000 | 2.734097000  | -0.366189000 |
| 1 | -3.669707000 | 2.942368000  | -1.125113000 |
| 1 | -3.646694000 | 2.891633000  | 0.394762000  |
| 8 | 2.433090000  | -2.629452000 | -2.485035000 |
| 1 | 2.313636000  | -1.676898000 | -2.672805000 |
| 1 | 1.611240000  | -2.846764000 | -2.006036000 |
| 8 | -2.341318000 | 0.043262000  | -2.427903000 |

|   |              |              |              |
|---|--------------|--------------|--------------|
| 1 | -2.264489000 | 0.998261000  | -2.605331000 |
| 1 | -3.003196000 | -0.009474000 | -1.702155000 |
| 8 | 2.009948000  | 2.649186000  | 1.509241000  |
| 1 | 2.117289000  | 1.685045000  | 1.599288000  |
| 1 | 2.755582000  | 2.906222000  | 0.906484000  |
| 8 | 0.154421000  | -3.007322000 | 3.369643000  |
| 1 | -0.644339000 | -3.113047000 | 2.813237000  |
| 1 | 0.087013000  | -2.091758000 | 3.693396000  |
| 8 | -1.867925000 | -2.971382000 | 1.314563000  |
| 1 | -1.201745000 | -3.039719000 | 0.596153000  |
| 1 | -1.952386000 | -1.997488000 | 1.410646000  |
| 8 | 1.857185000  | 3.063202000  | -2.449884000 |
| 1 | 1.945413000  | 2.108885000  | -2.660282000 |
| 1 | 1.145826000  | 3.043482000  | -1.783684000 |
| 8 | -0.071953000 | 2.574444000  | -0.299010000 |
| 1 | -0.069062000 | 1.563668000  | -0.422610000 |
| 1 | 0.662031000  | 2.728589000  | 0.344010000  |

**OH(H<sub>2</sub>O)<sub>26</sub>  
26w-I**

|   |              |              |              |
|---|--------------|--------------|--------------|
| 1 | -0.152279000 | 1.048507000  | -0.009570000 |
| 8 | 0.031708000  | 0.079182000  | -0.019332000 |
| 8 | -3.923544000 | -0.908710000 | 0.385305000  |
| 1 | -3.335331000 | -0.695502000 | -0.373338000 |
| 1 | -3.319787000 | -0.805214000 | 1.144091000  |
| 8 | -1.282835000 | -3.255698000 | 1.805660000  |
| 1 | -2.026641000 | -3.587817000 | 1.249130000  |
| 1 | -1.515055000 | -2.311483000 | 1.958770000  |
| 8 | 0.539340000  | -2.611015000 | -0.079671000 |
| 1 | 0.375147000  | -1.639567000 | -0.070121000 |
| 1 | -0.085896000 | -2.950561000 | 0.616040000  |
| 8 | -2.025872000 | -0.478186000 | -1.656546000 |
| 1 | -1.884458000 | -1.425142000 | -1.900204000 |
| 1 | -1.257032000 | -0.274730000 | -1.044636000 |
| 8 | 2.072272000  | 0.281082000  | 1.707817000  |
| 1 | 1.312932000  | 0.178630000  | 1.058730000  |
| 1 | 2.838147000  | 0.517386000  | 1.123841000  |
| 8 | 3.951268000  | 0.908801000  | -0.169080000 |
| 1 | 3.304327000  | 0.788745000  | -0.896517000 |
| 1 | 4.011743000  | 1.893945000  | -0.086236000 |
| 8 | 3.586647000  | 3.614549000  | 0.022205000  |
| 1 | 2.946657000  | 3.647583000  | 0.758588000  |
| 1 | 3.015649000  | 3.668320000  | -0.772443000 |
| 8 | 1.432634000  | 3.101141000  | 1.957946000  |
| 1 | 1.702476000  | 2.161165000  | 1.091743000  |
| 1 | 0.774393000  | 3.123203000  | 1.228058000  |
| 8 | -0.611575000 | 2.715636000  | 3.952253000  |
| 1 | 0.149104000  | 2.976057000  | 3.392752000  |
| 1 | -0.369663000 | 1.823600000  | 4.254326000  |
| 8 | -3.497763000 | 2.016411000  | -2.163344000 |
| 1 | -4.014582000 | 2.106090000  | -1.332474000 |
| 1 | -3.138659000 | 1.114369000  | -2.102635000 |
| 8 | -4.824388000 | 1.925534000  | 0.313669000  |
| 1 | -4.180355000 | 2.229805000  | 0.979995000  |
| 1 | -4.786726000 | 0.956036000  | 0.408351000  |
| 8 | 0.353075000  | -0.149293000 | 3.949729000  |
| 1 | 0.486595000  | -1.111114000 | 4.117862000  |
| 1 | 1.095104000  | 0.070966000  | 3.354628000  |
| 8 | 1.966424000  | 3.235004000  | -2.282446000 |
| 1 | 1.944256000  | 2.263332000  | -2.326404000 |
| 1 | 1.034997000  | 3.494543000  | -2.371750000 |
| 8 | -0.545930000 | 2.802275000  | 0.050051000  |
| 1 | -0.753060000 | 2.986479000  | -0.892846000 |
| 1 | -1.389903000 | 2.741468000  | 0.548415000  |
| 8 | -1.338460000 | -3.100221000 | -2.175435000 |
| 1 | -0.828754000 | -2.983347000 | -3.010437000 |
| 1 | -0.636236000 | -3.084609000 | -1.493545000 |
| 8 | 0.751604000  | -2.915443000 | 3.896928000  |
| 1 | 0.031388000  | -3.282688000 | 3.354218000  |
| 1 | 1.521042000  | -2.940776000 | 3.294856000  |
| 8 | 0.371446000  | -2.349319000 | -4.240012000 |
| 1 | 1.245422000  | -2.386313000 | -3.813698000 |
| 1 | 0.179354000  | -1.393756000 | -4.307750000 |
| 8 | 2.512012000  | -2.353124000 | -2.166242000 |
| 1 | 1.887894000  | -2.696470000 | -1.501033000 |
| 1 | 3.355594000  | -2.279119000 | -1.657457000 |
| 8 | -1.577502000 | -0.479858000 | 2.007210000  |
| 1 | -0.992139000 | -0.329667000 | 2.789485000  |

|   |              |              |              |
|---|--------------|--------------|--------------|
| 1 | -0.961924000 | -0.285818000 | 1.232329000  |
| 8 | -2.492755000 | 2.235047000  | 1.945597000  |
| 1 | -2.312941000 | 1.273056000  | 1.969641000  |
| 1 | -1.970689000 | 2.548987000  | 2.719415000  |
| 8 | -1.029631000 | 3.114184000  | -2.679771000 |
| 1 | -1.989068000 | 2.930196000  | -2.542697000 |
| 1 | -0.759732000 | 2.356445000  | -3.235025000 |
| 8 | 2.722712000  | -2.465661000 | 1.783237000  |
| 1 | 2.569830000  | -1.501044000 | 1.892958000  |
| 1 | 2.056612000  | -2.680331000 | 1.099045000  |
| 8 | -3.290746000 | -3.725287000 | -0.045013000 |
| 1 | -3.708846000 | -2.845603000 | 0.042195000  |
| 1 | -2.840103000 | -3.686116000 | -0.906977000 |
| 8 | 1.828233000  | 0.316962000  | -1.958235000 |
| 1 | 1.161407000  | 0.205745000  | -1.211582000 |
| 1 | 2.115699000  | -0.608691000 | -2.145425000 |
| 8 | 4.601948000  | -1.899417000 | -0.403878000 |
| 1 | 4.176745000  | -2.184374000 | 0.428024000  |
| 1 | 4.663498000  | -0.931257000 | -0.302671000 |
| 8 | -0.310266000 | 0.486567000  | -3.777217000 |
| 1 | 0.494213000  | 0.487861000  | -3.213974000 |
| 1 | -1.000812000 | 0.179430000  | -3.154234000 |

**26w-II**

|   |              |              |              |
|---|--------------|--------------|--------------|
| 1 | 0.382507000  | 0.997963000  | -0.237284000 |
| 8 | 0.032092000  | 0.103463000  | -0.022069000 |
| 8 | 3.452155000  | -0.657462000 | 1.841039000  |
| 1 | 2.586159000  | -0.278565000 | 2.114723000  |
| 1 | 3.301312000  | -0.874294000 | 0.902730000  |
| 8 | 1.671732000  | -3.610698000 | 0.114293000  |
| 1 | 2.023955000  | -3.683778000 | 1.032185000  |
| 1 | 2.046653000  | -2.758770000 | -0.204953000 |
| 8 | -0.722312000 | -2.463379000 | 0.588922000  |
| 1 | -0.458211000 | -1.540693000 | 0.365298000  |
| 1 | 0.109798000  | -2.983142000 | 0.421959000  |
| 8 | 0.875502000  | 0.239570000  | 2.501705000  |
| 1 | 0.560181000  | -0.591210000 | 2.935136000  |
| 1 | 0.523967000  | 0.162941000  | 1.560764000  |
| 8 | -0.947910000 | -0.350815000 | -2.454741000 |
| 1 | -0.593776000 | -0.209490000 | -1.523664000 |
| 1 | -1.865902000 | 0.023977000  | -2.404014000 |
| 8 | -3.389807000 | 0.750177000  | -1.967601000 |
| 1 | -3.185223000 | 0.865947000  | -1.015803000 |
| 1 | -3.266748000 | 1.663954000  | -2.332638000 |
| 8 | -2.618123000 | 3.268863000  | -2.689269000 |
| 1 | -1.707602000 | 3.115667000  | -3.002497000 |
| 1 | -2.491989000 | 3.575984000  | -1.764701000 |
| 8 | 0.131304000  | 2.256392000  | -3.146523000 |
| 1 | -0.238261000 | 1.364205000  | -2.991412000 |
| 1 | 0.425739000  | 2.532654000  | -2.252999000 |
| 8 | 2.707230000  | 1.209367000  | -3.950760000 |
| 1 | 1.842179000  | 1.653961000  | -3.835217000 |
| 1 | 2.468673000  | 0.268387000  | -4.014211000 |
| 8 | 1.852818000  | 2.930731000  | 2.112808000  |
| 1 | 2.809715000  | 2.781851000  | 1.932301000  |
| 1 | 1.555485000  | 2.066504000  | 2.449976000  |
| 8 | 4.406106000  | 2.088657000  | 1.362729000  |
| 1 | 4.387658000  | 2.042038000  | 0.389391000  |
| 1 | 4.318786000  | 1.150774000  | 1.619336000  |
| 8 | 1.495619000  | -1.463062000 | -3.390321000 |
| 1 | 1.350196000  | -2.433317000 | -3.297395000 |
| 1 | 0.596082000  | -1.092594000 | -3.301496000 |
| 8 | -2.423877000 | 3.619476000  | 0.074053000  |
| 1 | -2.580756000 | 2.710110000  | 0.375637000  |
| 1 | -1.782719000 | 3.965875000  | 0.728527000  |
| 8 | 1.268614000  | 2.569084000  | -0.618756000 |
| 1 | 1.347931000  | 2.888969000  | 0.304052000  |
| 1 | 2.175405000  | 2.256090000  | -0.840471000 |
| 8 | -0.166496000 | -2.152117000 | 3.371232000  |
| 1 | -1.015557000 | -1.865581000 | 3.784360000  |
| 1 | -0.435806000 | -2.389274000 | 2.460423000  |
| 8 | 0.842290000  | -4.078859000 | -2.674912000 |
| 1 | 1.190959000  | -4.215709000 | -1.776543000 |
| 1 | -0.112136000 | -3.925683000 | -2.527665000 |
| 8 | -2.609055000 | -1.051898000 | 4.066488000  |
| 1 | -3.155533000 | -1.269290000 | 3.290865000  |
| 1 | -2.396277000 | -0.104326000 | 3.948300000  |
| 8 | -3.414112000 | -1.757096000 | 1.289009000  |
| 1 | -2.589467000 | -2.247384000 | 1.120237000  |

|   |              |              |              |
|---|--------------|--------------|--------------|
| 1 | -3.911473000 | -1.855865000 | 0.441374000  |
| 8 | 2.298921000  | -1.049550000 | -0.794648000 |
| 1 | 2.128676000  | -1.198453000 | -1.758230000 |
| 1 | 1.439319000  | -0.624099000 | -0.485854000 |
| 8 | 3.671133000  | 1.389347000  | -1.353103000 |
| 1 | 3.339681000  | 0.499552000  | -1.114902000 |
| 1 | 3.511847000  | 1.415810000  | -2.325617000 |
| 8 | -0.742396000 | 4.224860000  | 2.280911000  |
| 1 | 0.212589000  | 4.041920000  | 2.242402000  |
| 1 | -1.081598000 | 3.488609000  | 2.822771000  |
| 8 | -1.782032000 | -3.007223000 | -2.021840000 |
| 1 | -1.493199000 | -2.117770000 | -2.325585000 |
| 1 | -1.535224000 | -2.961384000 | -1.075941000 |
| 8 | 2.491520000  | -3.273592000 | 2.748656000  |
| 1 | 2.964079000  | -2.429403000 | 2.612175000  |
| 1 | 1.685402000  | -3.013704000 | 3.229261000  |
| 8 | -2.446110000 | 0.768702000  | 0.716271000  |
| 1 | -1.514381000 | 0.520285000  | 0.432128000  |
| 1 | -2.852544000 | -0.091411000 | 0.977316000  |
| 8 | -4.394178000 | -1.886416000 | -1.298379000 |
| 1 | -3.661886000 | -2.389061000 | -1.704261000 |
| 1 | -4.292698000 | -0.995972000 | -1.683527000 |
| 8 | -1.590679000 | 1.567582000  | 3.282269000  |
| 1 | -1.977182000 | 1.405487000  | 2.393580000  |
| 1 | -0.688378000 | 1.207850000  | 3.169969000  |

**26w-III**

|   |              |              |              |
|---|--------------|--------------|--------------|
| 1 | 0.010736000  | 1.015798000  | -0.333547000 |
| 8 | -0.032953000 | 0.070743000  | -0.055812000 |
| 8 | 2.851503000  | 0.461848000  | 2.778745000  |
| 1 | 1.881153000  | 0.607967000  | 2.741174000  |
| 1 | 3.053882000  | 0.185975000  | 1.866134000  |
| 8 | 2.387396000  | -2.967408000 | 1.051368000  |
| 1 | 2.483935000  | -2.883216000 | 2.029169000  |
| 1 | 2.603380000  | -2.062631000 | 0.725062000  |
| 8 | -0.246997000 | -2.550715000 | 0.699719000  |
| 1 | -0.177388000 | -1.610486000 | 0.413518000  |
| 1 | 0.704119000  | -2.814279000 | 0.838643000  |
| 8 | 0.032158000  | 0.601198000  | 2.548873000  |
| 1 | -0.152432000 | -0.258718000 | 2.999138000  |
| 1 | 0.003038000  | 0.368297000  | 1.569228000  |
| 8 | -0.043270000 | -0.803251000 | -2.576890000 |
| 1 | -0.030635000 | -0.511845000 | -1.614606000 |
| 1 | -0.991080000 | -0.668733000 | -2.825531000 |
| 8 | -2.731346000 | -0.299102000 | -2.868087000 |
| 1 | -2.845577000 | -0.086918000 | -1.917664000 |
| 1 | -2.704670000 | 0.591544000  | -3.293370000 |
| 8 | -2.297417000 | 2.304802000  | -3.679774000 |
| 1 | -1.319960000 | 2.330839000  | -3.697462000 |
| 1 | -2.532943000 | 2.779001000  | -2.862445000 |
| 8 | 0.595804000  | 1.938068000  | -3.327141000 |
| 1 | 0.440138000  | 0.986527000  | -3.164239000 |
| 1 | 0.529545000  | 2.327389000  | -2.427759000 |
| 8 | 3.482481000  | 1.672562000  | -3.205404000 |
| 1 | 2.540881000  | 1.849721000  | -3.390206000 |
| 1 | 3.521843000  | 0.702138000  | -3.171956000 |
| 8 | 0.370307000  | 3.397469000  | 1.864340000  |
| 1 | 1.349345000  | 3.533321000  | 1.948763000  |
| 1 | 0.237177000  | 2.529437000  | 2.285694000  |
| 8 | 3.087814000  | 3.385913000  | 1.997209000  |
| 1 | 3.374482000  | 3.165772000  | 1.083500000  |
| 1 | 3.237230000  | 2.545428000  | 2.465229000  |
| 8 | 2.792330000  | -1.226302000 | -2.631534000 |
| 1 | 2.858524000  | -2.188346000 | -2.430090000 |
| 1 | 1.853049000  | -1.116097000 | -2.870250000 |
| 8 | -2.872775000 | 2.921903000  | -0.863530000 |
| 1 | -2.873095000 | 3.423986000  | -0.014013000 |
| 1 | -3.066516000 | 2.006743000  | -0.591339000 |
| 8 | -0.087337000 | 2.769925000  | -0.791418000 |
| 1 | -1.059474000 | 2.900356000  | -0.843537000 |
| 1 | 0.164886000  | 3.105689000  | 0.099358000  |
| 8 | -0.565172000 | -1.928006000 | 3.469369000  |
| 1 | -1.538029000 | -1.868829000 | 3.614843000  |
| 1 | -0.506101000 | -2.289536000 | 2.561483000  |
| 8 | 2.583309000  | -3.867990000 | -1.736205000 |
| 1 | 2.660934000  | -3.819888000 | -0.766565000 |
| 1 | 1.625349000  | -3.990376000 | -1.882161000 |
| 8 | -3.312757000 | -1.511590000 | 3.365865000  |
| 1 | -3.546568000 | -1.902428000 | 2.505846000  |

|   |              |              |              |
|---|--------------|--------------|--------------|
| 1 | -3.306878000 | -0.549319000 | 3.193457000  |
| 8 | -3.124087000 | -2.514205000 | 0.568480000  |
| 1 | -2.190744000 | -2.762648000 | 0.701559000  |
| 1 | -3.301844000 | -2.808870000 | -0.357330000 |
| 8 | 2.595831000  | -0.407659000 | -0.000107000 |
| 1 | 2.784735000  | -0.649728000 | -0.939559000 |
| 1 | 1.613714000  | -0.204618000 | -0.015176000 |
| 8 | 3.790246000  | 2.200420000  | -0.414554000 |
| 1 | 3.411888000  | 1.323310000  | -0.222481000 |
| 1 | 3.757992000  | 2.226953000  | -1.392175000 |
| 8 | -2.499240000 | 3.992484000  | 1.666759000  |
| 1 | -1.535058000 | 4.077802000  | 1.784067000  |
| 1 | -2.703221000 | 3.171439000  | 2.156387000  |
| 8 | -0.324423000 | -3.547470000 | -1.987291000 |
| 1 | -0.163726000 | -2.641051000 | -2.331801000 |
| 1 | -0.377447000 | -3.371429000 | -1.025752000 |
| 8 | 2.353529000  | -2.251973000 | 3.732427000  |
| 1 | 2.616901000  | -1.319295000 | 3.599051000  |
| 1 | 1.404512000  | -2.198582000 | 3.942129000  |
| 8 | -2.692786000 | 0.140086000  | -0.054092000 |
| 1 | -1.686056000 | 0.090084000  | -0.047789000 |
| 1 | -2.964248000 | -0.776361000 | 0.194440000  |
| 8 | -3.206681000 | -3.087383000 | -2.141036000 |
| 1 | -2.288699000 | -3.402862000 | -2.256014000 |
| 1 | -3.212475000 | -2.232283000 | -2.608296000 |
| 8 | -2.760224000 | 1.241881000  | 2.548141000  |
| 1 | -2.851203000 | 0.937492000  | 1.618856000  |
| 1 | -1.799246000 | 1.116368000  | 2.696848000  |

**26w-IV**

|   |              |              |              |
|---|--------------|--------------|--------------|
| 1 | 0.154679000  | 1.009388000  | -0.377888000 |
| 8 | -0.042883000 | 0.091782000  | -0.075806000 |
| 8 | 2.739067000  | 0.048024000  | 2.830834000  |
| 1 | 1.820327000  | 0.375885000  | 2.866394000  |
| 1 | 2.839008000  | -0.223581000 | 1.899181000  |
| 8 | 1.923253000  | -3.287821000 | 1.050279000  |
| 1 | 2.056099000  | -3.244452000 | 2.027201000  |
| 1 | 2.258179000  | -2.414161000 | 0.740626000  |
| 8 | -0.624331000 | -2.479494000 | 0.701818000  |
| 1 | -0.420978000 | -1.559196000 | 0.415666000  |
| 1 | 0.277997000  | -2.876805000 | 0.845605000  |
| 8 | -0.035253000 | 0.762471000  | 2.491250000  |
| 1 | -0.945013000 | 1.120608000  | 2.639574000  |
| 1 | -0.053701000 | 0.482164000  | 1.523027000  |
| 8 | -0.177870000 | -0.800456000 | -2.596488000 |
| 1 | -0.125094000 | -0.505824000 | -1.638078000 |
| 1 | -1.096298000 | -0.531308000 | -2.846671000 |
| 8 | -2.763325000 | 0.092565000  | -2.888286000 |
| 1 | -2.847123000 | 0.317596000  | -1.937116000 |
| 1 | -2.599111000 | 0.970357000  | -3.308456000 |
| 8 | -1.925586000 | 2.604997000  | -3.683511000 |
| 1 | -0.956262000 | 2.480816000  | -3.723329000 |
| 1 | -2.067116000 | 3.117446000  | -2.868151000 |
| 8 | 0.885710000  | 1.796347000  | -3.388749000 |
| 1 | 0.585790000  | 0.880229000  | -3.225362000 |
| 1 | 0.869376000  | 2.193692000  | -2.489539000 |
| 8 | 3.706665000  | 1.121860000  | -3.168387000 |
| 1 | 2.808809000  | 1.438262000  | -3.388952000 |
| 1 | 3.593973000  | 0.157669000  | -3.122158000 |
| 8 | 0.976266000  | 3.337231000  | 1.737331000  |
| 1 | 1.957867000  | 3.337140000  | 1.869074000  |
| 1 | 0.709781000  | 2.467928000  | 2.098987000  |
| 8 | 3.653557000  | 2.885512000  | 2.017745000  |
| 1 | 3.907500000  | 2.592248000  | 1.114379000  |
| 1 | 3.615689000  | 2.044772000  | 2.505256000  |
| 8 | 2.574612000  | -1.621434000 | -2.575954000 |
| 1 | 2.501777000  | -2.585538000 | -2.383989000 |
| 1 | 1.666799000  | -1.380637000 | -2.838587000 |
| 8 | -2.377526000 | 3.316610000  | -0.839810000 |
| 1 | -2.286094000 | 3.770449000  | 0.031004000  |
| 1 | -2.719460000 | 2.435149000  | -0.604166000 |
| 8 | 0.351992000  | 2.751641000  | -0.876240000 |
| 1 | -0.590201000 | 3.029788000  | -0.894701000 |
| 1 | 0.692819000  | 3.073425000  | -0.008848000 |
| 8 | -0.771311000 | -1.786595000 | 3.488457000  |
| 1 | -0.462905000 | -0.876933000 | 3.282280000  |
| 1 | -0.808830000 | -2.175987000 | 2.591478000  |
| 8 | 1.992116000  | -4.211195000 | -1.719683000 |
| 1 | 2.071236000  | -4.169412000 | -0.749371000 |

|   |              |              |              |
|---|--------------|--------------|--------------|
| 1 | 1.027100000  | -4.196091000 | -1.869821000 |
| 8 | -3.545449000 | -0.928464000 | 3.385745000  |
| 1 | -3.802337000 | -1.354005000 | 2.549312000  |
| 1 | -2.675286000 | -1.329771000 | 3.582739000  |
| 8 | -3.454939000 | -2.016951000 | 0.579420000  |
| 1 | -2.563991000 | -2.391795000 | 0.709294000  |
| 1 | -3.676011000 | -2.293204000 | -0.342321000 |
| 8 | 2.472382000  | -0.760256000 | 0.042516000  |
| 1 | 2.641713000  | -1.035870000 | -0.892101000 |
| 1 | 1.528707000  | -0.418500000 | 0.001739000  |
| 8 | 4.135422000  | 1.575532000  | -0.379416000 |
| 1 | 3.597994000  | 0.786707000  | -0.183929000 |
| 1 | 4.085809000  | 1.620705000  | -1.355735000 |
| 8 | -1.791098000 | 4.224306000  | 1.720037000  |
| 1 | -0.823866000 | 4.148965000  | 1.826527000  |
| 1 | -2.145602000 | 3.503591000  | -2.708800000 |
| 8 | -0.840089000 | -3.474370000 | -1.982130000 |
| 1 | -0.551731000 | -2.602443000 | -2.332249000 |
| 1 | -0.869474000 | -3.286073000 | -1.022012000 |
| 8 | 2.037452000  | -2.654353000 | 3.745250000  |
| 1 | 2.411728000  | -1.759555000 | 3.623639000  |
| 1 | 1.089291000  | -2.471396000 | 3.888824000  |
| 8 | -2.664842000 | 0.544083000  | -0.084062000 |
| 1 | -1.676703000 | 0.349275000  | -0.073574000 |
| 1 | -3.064433000 | -0.318525000 | 0.184638000  |
| 8 | -3.623505000 | -2.599241000 | -2.129290000 |
| 1 | -3.512668000 | -1.758442000 | -2.608824000 |
| 1 | -2.760104000 | -3.042930000 | -2.245103000 |
| 8 | -2.661934000 | 1.584540000  | 2.552089000  |
| 1 | -3.087978000 | 0.816574000  | 2.997752000  |
| 1 | -2.770097000 | 1.346654000  | 1.606274000  |

**26w-V**

|   |              |              |              |
|---|--------------|--------------|--------------|
| 1 | -1.054887000 | 0.199830000  | -0.073940000 |
| 8 | -0.090308000 | 0.030144000  | -0.021678000 |
| 8 | -0.599512000 | -3.582440000 | -1.477044000 |
| 1 | -0.427450000 | -2.700689000 | -1.879658000 |
| 1 | -0.564666000 | -3.391774000 | -0.522182000 |
| 8 | 2.305019000  | -3.103365000 | 0.968818000  |
| 1 | 2.422238000  | -3.583187000 | 0.116027000  |
| 1 | 1.330408000  | -2.994805000 | 1.036931000  |
| 8 | 2.616391000  | -0.560175000 | 0.116824000  |
| 1 | 1.662602000  | -0.330240000 | 0.065637000  |
| 1 | 2.609126000  | -1.494674000 | 0.456213000  |
| 8 | 0.044736000  | -1.033358000 | -2.461084000 |
| 1 | 1.003348000  | -1.192698000 | -2.641813000 |
| 1 | 0.032971000  | -0.610143000 | -1.549561000 |
| 8 | 0.252889000  | 1.160037000  | 2.361158000  |
| 1 | 0.156145000  | 0.727072000  | 1.457914000  |
| 1 | 0.353083000  | 2.122352000  | 2.131465000  |
| 8 | 0.502591000  | 3.688295000  | 1.383954000  |
| 1 | 0.547663000  | 3.388554000  | 0.448414000  |
| 1 | -0.426727000 | 4.014896000  | 1.474113000  |
| 8 | -2.193907000 | 4.168716000  | 1.544051000  |
| 1 | -2.487669000 | 3.412284000  | 2.079943000  |
| 1 | -2.549476000 | 3.937756000  | 0.658126000  |
| 8 | -2.595244000 | 1.318364000  | 2.462943000  |
| 1 | -1.619042000 | 1.279549000  | 2.530635000  |
| 1 | -2.759524000 | 1.078401000  | 1.532395000  |
| 8 | -3.177600000 | -1.269427000 | 3.606044000  |
| 1 | -3.102188000 | -0.329556000 | 3.346764000  |
| 1 | -2.273084000 | -1.486114000 | 3.890304000  |
| 8 | -2.764005000 | -0.662448000 | -2.804140000 |
| 1 | -3.140759000 | -1.544153000 | -2.577803000 |
| 1 | -1.810953000 | -0.845388000 | -2.902632000 |
| 8 | -3.483008000 | -3.150923000 | -1.768444000 |
| 1 | -3.679744000 | -2.974276000 | -0.831305000 |
| 1 | -2.581652000 | -3.523747000 | -1.732608000 |
| 8 | -0.196117000 | -1.364156000 | 3.710242000  |
| 1 | 0.722934000  | -1.681741000 | 3.875774000  |
| 1 | -0.067586000 | -0.422182000 | 3.491479000  |
| 8 | -3.328286000 | 3.070481000  | -0.780678000 |
| 1 | -3.018566000 | 2.947401000  | -1.701249000 |
| 1 | -3.457002000 | 2.157128000  | -0.480116000 |
| 8 | -2.964661000 | 0.207987000  | -0.179893000 |
| 1 | -2.939289000 | 0.011589000  | -1.145730000 |
| 1 | -3.188205000 | -0.661596000 | 0.228807000  |
| 8 | 2.776091000  | -1.332866000 | -2.627564000 |
| 1 | 3.020699000  | -0.519207000 | -3.130810000 |

|   |              |              |              |
|---|--------------|--------------|--------------|
| 1 | 2.895895000  | -1.052584000 | -1.697899000 |
| 8 | 2.488396000  | -2.082451000 | 3.741019000  |
| 1 | 2.634673000  | -2.601545000 | 2.931194000  |
| 1 | 2.844814000  | -1.200276000 | 3.518802000  |
| 8 | 3.158330000  | 1.192690000  | -3.698890000 |
| 1 | 3.442981000  | 1.683781000  | -2.909008000 |
| 1 | 2.230482000  | 1.472678000  | -3.834864000 |
| 8 | 3.589513000  | 1.985719000  | -0.854530000 |
| 1 | 3.554042000  | 1.076470000  | -0.509064000 |
| 1 | 3.647646000  | 2.537574000  | -0.038277000 |
| 8 | -0.381322000 | -2.328152000 | 1.128363000  |
| 1 | -0.379004000 | -2.094028000 | 2.088275000  |
| 1 | -0.257021000 | -1.430350000 | 0.680977000  |
| 8 | -3.221876000 | -2.271168000 | 1.003780000  |
| 1 | -2.254890000 | -2.427280000 | 1.009581000  |
| 1 | -3.393350000 | -2.038674000 | 1.944478000  |
| 8 | -2.595847000 | 2.231466000  | -3.396010000 |
| 1 | -2.879482000 | 1.301642000  | -3.373951000 |
| 1 | -1.649347000 | 2.169226000  | -3.622470000 |
| 8 | 2.976689000  | 0.602987000  | 2.721969000  |
| 1 | 2.013921000  | 0.803744000  | 2.747906000  |
| 1 | 3.060768000  | 0.243127000  | 1.816667000  |
| 8 | 2.300675000  | -4.071405000 | -1.643327000 |
| 1 | 1.331028000  | -4.087293000 | -1.752209000 |
| 1 | 2.582676000  | -3.314837000 | -2.187248000 |
| 8 | 0.830958000  | 2.366013000  | -1.040614000 |
| 1 | 0.483527000  | 1.512622000  | -0.661796000 |
| 1 | 1.808598000  | 2.258938000  | -1.025198000 |
| 8 | 3.385768000  | 3.284667000  | 1.592466000  |
| 1 | 3.377751000  | 2.498278000  | 2.169757000  |
| 1 | 2.474299000  | 3.624025000  | 1.658681000  |
| 8 | 0.262845000  | 1.666590000  | -3.641639000 |
| 1 | 0.409155000  | 2.053725000  | -2.746216000 |
| 1 | 0.114512000  | 0.725807000  | -3.428429000 |

**26w-VI**

|   |              |              |              |
|---|--------------|--------------|--------------|
| 1 | -0.441452000 | -0.047070000 | -1.100656000 |
| 8 | 0.302910000  | -0.063599000 | -0.452003000 |
| 8 | 4.665725000  | -2.621658000 | -0.998867000 |
| 1 | 4.223579000  | -2.796437000 | -0.142705000 |
| 1 | 4.830999000  | -1.657784000 | -0.964767000 |
| 8 | 2.515750000  | -2.783890000 | -2.606778000 |
| 1 | 3.375735000  | -2.813167000 | -2.106912000 |
| 1 | 2.572725000  | -3.457819000 | -3.294690000 |
| 8 | 2.208894000  | 0.037546000  | -2.325315000 |
| 1 | 1.478881000  | -0.014420000 | -1.640111000 |
| 1 | 2.234259000  | -0.856772000 | -2.713252000 |
| 8 | 2.575663000  | 2.944604000  | 1.187751000  |
| 1 | 2.696770000  | 1.976330000  | 1.266678000  |
| 1 | 3.218691000  | 3.192911000  | 0.480568000  |
| 8 | -1.115637000 | -0.295590000 | 1.769010000  |
| 1 | -1.173003000 | -1.277020000 | 1.865367000  |
| 1 | -0.600827000 | -0.191655000 | 0.907759000  |
| 8 | 0.684255000  | -2.706977000 | -0.471532000 |
| 1 | 1.245136000  | -2.867663000 | -1.260098000 |
| 1 | 0.551958000  | -1.709879000 | -0.462997000 |
| 8 | -0.999192000 | -3.047221000 | 1.863932000  |
| 1 | -0.512360000 | -3.192462000 | 1.031804000  |
| 1 | -0.298546000 | -3.092532000 | 2.556393000  |
| 8 | 1.811975000  | 2.829794000  | -2.689124000 |
| 1 | 1.282291000  | 2.818391000  | -1.869371000 |
| 1 | 1.954296000  | 1.876249000  | -2.852431000 |
| 8 | 4.185930000  | 3.212251000  | -1.043395000 |
| 1 | 4.522051000  | 2.296102000  | -1.052562000 |
| 1 | 3.489992000  | 3.200908000  | -1.731347000 |
| 8 | -1.407662000 | 2.613251000  | 2.049340000  |
| 1 | -0.926537000 | 2.691318000  | 1.195615000  |
| 1 | -1.468568000 | 1.647940000  | 2.162735000  |
| 8 | 0.987327000  | 2.895199000  | 3.649791000  |
| 1 | 0.123900000  | 2.992666000  | 3.200433000  |
| 1 | 1.626146000  | 3.156252000  | 2.962702000  |
| 8 | 0.245639000  | 2.586787000  | -0.227658000 |
| 1 | 1.048821000  | 2.841920000  | 0.289851000  |
| 1 | 0.297295000  | 1.582527000  | -0.285818000 |
| 8 | 4.487367000  | 0.273891000  | -0.806758000 |
| 1 | 3.698878000  | 0.204461000  | -1.399905000 |
| 1 | 4.073134000  | 0.254810000  | 0.074106000  |
| 8 | 1.152874000  | -2.813993000 | 3.620680000  |
| 1 | 1.889311000  | -2.890437000 | 2.983892000  |

|   |              |              |              |
|---|--------------|--------------|--------------|
| 1 | 1.170976000  | -1.873396000 | 3.873127000  |
| 8 | 2.905378000  | -2.705952000 | 1.279591000  |
| 1 | 2.911797000  | -1.726878000 | 1.334656000  |
| 1 | 2.112649000  | -2.851181000 | 0.716133000  |
| 8 | 2.445714000  | 0.092997000  | 1.271503000  |
| 1 | 1.989108000  | 0.088536000  | 2.156037000  |
| 1 | 1.699445000  | 0.035842000  | 0.630942000  |
| 8 | 0.991232000  | 0.120747000  | 3.540920000  |
| 1 | 1.022665000  | 1.081342000  | 3.763911000  |
| 1 | 0.152009000  | 0.024683000  | 3.035098000  |
| 8 | -3.866015000 | -2.975669000 | 1.162170000  |
| 1 | -4.062122000 | -2.046421000 | 1.375397000  |
| 1 | -2.974267000 | -3.119879000 | 1.523080000  |
| 8 | -1.693633000 | 0.087795000  | -2.380637000 |
| 1 | -2.617144000 | 0.007524000  | -2.025905000 |
| 1 | -1.602501000 | 1.027445000  | -2.625071000 |
| 8 | -1.416995000 | -2.739030000 | -2.615835000 |
| 1 | -0.830589000 | -2.870435000 | -1.851615000 |
| 1 | -1.403290000 | -1.771023000 | -2.739814000 |
| 8 | -4.136860000 | -2.934465000 | -1.686808000 |
| 1 | -4.038158000 | -3.094812000 | -0.725349000 |
| 1 | -3.224044000 | -3.007221000 | -2.031327000 |
| 8 | -4.241544000 | 2.686808000  | 1.276541000  |
| 1 | -3.334606000 | 2.905863000  | 1.557865000  |
| 1 | -4.223521000 | 2.801814000  | 0.302744000  |
| 8 | -1.360578000 | 2.949162000  | -2.533136000 |
| 1 | -0.654984000 | 3.184304000  | -3.154368000 |
| 1 | -0.910345000 | 2.988618000  | -1.666044000 |
| 8 | -4.200352000 | -0.203500000 | -1.415889000 |
| 1 | -4.122674000 | -0.183176000 | -0.433173000 |
| 1 | -4.331217000 | -1.163388000 | -1.614539000 |
| 8 | -3.903803000 | -0.050952000 | 1.323250000  |
| 1 | -4.150220000 | 0.900846000  | 1.417270000  |
| 1 | -2.935846000 | -0.061098000 | 1.468146000  |
| 8 | -4.193200000 | 2.650001000  | -1.569090000 |
| 1 | -4.336609000 | 1.696379000  | -1.719042000 |
| 1 | -3.369361000 | 2.851350000  | -2.041679000 |

**26w-VII**

|   |              |              |              |
|---|--------------|--------------|--------------|
| 8 | 0.600095000  | -0.085387000 | 0.029172000  |
| 8 | -0.091014000 | -0.980573000 | 2.518846000  |
| 8 | 2.117890000  | 2.013529000  | 0.773906000  |
| 8 | -2.268642000 | -1.622411000 | -0.711856000 |
| 8 | -0.075803000 | 0.988316000  | -2.428387000 |
| 8 | -2.165365000 | -0.727537000 | -3.355091000 |
| 8 | -0.604902000 | -2.948687000 | -3.818545000 |
| 8 | -2.342052000 | -2.429831000 | 2.068837000  |
| 8 | 0.123762000  | 3.889428000  | 1.088493000  |
| 8 | -1.944289000 | 2.904786000  | -1.887589000 |
| 8 | 0.455939000  | 4.644330000  | -1.544841000 |
| 8 | -4.040145000 | 1.292213000  | -2.624978000 |
| 8 | -4.028520000 | -0.427837000 | 2.991395000  |
| 8 | 1.700451000  | -1.185976000 | -3.337019000 |
| 8 | -1.630089000 | 1.216764000  | 3.345063000  |
| 8 | -1.671002000 | 1.647603000  | 0.698037000  |
| 8 | 0.377670000  | 3.011978000  | 3.873719000  |
| 8 | 2.208256000  | 0.807895000  | 3.269184000  |
| 8 | -4.121040000 | 0.282860000  | 0.152154000  |
| 8 | 2.330194000  | 2.497038000  | -2.013519000 |
| 8 | 4.120275000  | 0.567626000  | -2.829527000 |
| 8 | 1.889146000  | -2.979660000 | 1.858184000  |
| 8 | 1.882374000  | -2.291302000 | -0.824438000 |
| 8 | -0.459232000 | -4.708139000 | 1.556311000  |
| 8 | -0.435836000 | -3.565963000 | -1.018338000 |
| 8 | 3.796777000  | -0.359878000 | -0.228575000 |
| 8 | 4.220493000  | -1.280187000 | 2.451378000  |
| 1 | 1.118403000  | -0.866959000 | -0.293254000 |
| 1 | 2.332936000  | 1.150763000  | 2.357665000  |
| 1 | 1.495278000  | 0.152053000  | 3.180997000  |
| 1 | -1.020449000 | 1.921901000  | 3.674257000  |
| 1 | -1.044757000 | 0.434085000  | 3.252200000  |
| 1 | -1.076840000 | 0.931879000  | 0.400030000  |
| 1 | -1.711363000 | 1.524805000  | 1.687738000  |
| 1 | 1.480069000  | 2.756914000  | 0.880742000  |
| 1 | -2.350632000 | -1.300729000 | -1.637499000 |
| 1 | -1.399827000 | -0.144056000 | -3.180396000 |

|   |              |              |              |
|---|--------------|--------------|--------------|
| 1 | -1.736869000 | -1.560629000 | -3.669898000 |
| 1 | -0.606170000 | -3.394735000 | -2.949087000 |
| 1 | 0.258230000  | -2.489748000 | -3.827712000 |
| 1 | 0.461666000  | -3.125401000 | -0.935897000 |
| 1 | 0.383393000  | -4.274514000 | 1.798500000  |
| 1 | -1.140286000 | -4.142307000 | 1.958215000  |
| 1 | 4.149029000  | -0.596421000 | 0.653168000  |
| 1 | 3.166452000  | -1.090756000 | -0.422309000 |
| 1 | 3.555602000  | -1.989337000 | 2.350497000  |
| 1 | 3.733005000  | -0.592127000 | 2.937561000  |
| 1 | -3.011440000 | -1.851015000 | 2.505575000  |
| 1 | -2.473030000 | -2.241042000 | 1.120354000  |
| 1 | 1.131122000  | -0.401779000 | -3.261948000 |
| 1 | 1.741538000  | -1.546216000 | -2.409904000 |
| 1 | 2.560194000  | -2.920407000 | -1.115905000 |
| 1 | 0.232474000  | 4.329118000  | 0.211574000  |
| 1 | -0.576347000 | 3.228465000  | 0.926539000  |
| 1 | -3.404702000 | 0.251461000  | 3.304808000  |
| 1 | -4.287143000 | -0.111662000 | 2.103777000  |
| 1 | -0.327820000 | 4.244837000  | -1.959897000 |
| 1 | 1.202588000  | 4.090940000  | -1.845904000 |
| 1 | -2.009994000 | 2.727442000  | -0.932475000 |
| 1 | -2.750107000 | 2.452845000  | -2.245905000 |
| 1 | -0.882038000 | -1.572729000 | 2.424231000  |
| 1 | 0.078014000  | -0.683870000 | 1.591748000  |
| 1 | 1.284984000  | -2.316250000 | 2.243307000  |
| 1 | 1.892417000  | -2.745169000 | 0.892307000  |
| 1 | 4.235104000  | 0.237931000  | -1.912026000 |
| 1 | 3.487215000  | -0.073210000 | -3.203512000 |
| 1 | -3.652867000 | -0.540889000 | -0.093884000 |
| 1 | -3.359919000 | 0.875828000  | 0.315472000  |
| 1 | 1.126548000  | 2.387734000  | 3.795887000  |
| 1 | 0.429001000  | 3.548213000  | 3.062497000  |
| 1 | 0.046907000  | 0.580670000  | -1.540030000 |
| 1 | -0.727910000 | 1.719504000  | -2.283286000 |
| 1 | -4.313628000 | 0.944597000  | -1.754446000 |
| 1 | -3.598434000 | 0.529558000  | -3.045216000 |
| 1 | 3.072347000  | 1.970833000  | -2.399283000 |
| 1 | 1.549676000  | 1.959866000  | -2.257142000 |
| 1 | 1.274992000  | 0.600461000  | 0.279974000  |
| 1 | 2.510398000  | 2.152839000  | -0.113713000 |
| 1 | -1.600623000 | -2.353470000 | -0.804551000 |
| 1 | -0.489506000 | -4.148117000 | -0.230355000 |

**26w-VIII**

|   |              |              |              |
|---|--------------|--------------|--------------|
| 1 | 2.108451000  | -0.181468000 | -2.707930000 |
| 8 | 2.068899000  | -0.105631000 | -1.742122000 |
| 8 | 4.939005000  | 2.774612000  | 1.361700000  |
| 1 | 5.044966000  | 1.829808000  | 1.598973000  |
| 1 | 3.992591000  | 2.935301000  | 1.545231000  |
| 8 | 5.087566000  | 2.728909000  | -1.317420000 |
| 1 | 5.109674000  | 2.818199000  | -0.325142000 |
| 1 | 5.751885000  | 3.345580000  | -1.647193000 |
| 8 | 2.239029000  | 2.536807000  | -1.321064000 |
| 1 | 2.196823000  | 1.557743000  | -1.525091000 |
| 1 | 3.164654000  | 2.777179000  | -1.516395000 |
| 8 | -0.742364000 | 0.254379000  | 1.474863000  |
| 1 | 0.228846000  | 0.159858000  | 1.564030000  |
| 1 | -0.882975000 | 1.236582000  | 1.466250000  |
| 8 | 1.986980000  | -2.834887000 | -1.286908000 |
| 1 | 2.940666000  | -3.081660000 | -1.350295000 |
| 1 | 2.011650000  | -1.863062000 | -1.472250000 |
| 8 | 4.755044000  | -0.138353000 | -1.197638000 |
| 1 | 5.046197000  | 0.763061000  | -1.428479000 |
| 1 | 3.785563000  | -0.133082000 | -1.413394000 |
| 8 | 4.732021000  | -3.073817000 | -1.115252000 |
| 1 | 4.993305000  | -2.150171000 | -1.275268000 |
| 1 | 4.761872000  | -3.148162000 | -0.136783000 |
| 8 | -0.607991000 | 2.807091000  | -1.503579000 |
| 1 | -0.631269000 | 1.829078000  | -1.563038000 |
| 1 | 0.336338000  | 3.005268000  | -1.647101000 |
| 8 | -0.860453000 | 2.969413000  | 1.280500000  |
| 1 | 0.077155000  | 3.132394000  | 1.502032000  |
| 1 | -0.869330000 | 3.048914000  | 0.299996000  |
| 8 | -0.881273000 | -2.864982000 | -1.449496000 |
| 1 | -0.804015000 | -1.894020000 | -1.553335000 |
| 1 | 0.039248000  | -3.163902000 | -1.573133000 |
| 8 | -1.233851000 | -2.616705000 | 1.320019000  |
| 1 | -1.226286000 | -2.809454000 | 0.354882000  |

|   |              |              |              |
|---|--------------|--------------|--------------|
| 1 | -1.247750000 | -1.643778000 | 1.351384000  |
| 8 | -0.524373000 | -0.034910000 | -1.304510000 |
| 1 | -0.624271000 | 0.031999000  | -0.329441000 |
| 1 | 0.471652000  | -0.061773000 | -1.476371000 |
| 8 | 2.026966000  | 2.700930000  | 1.409251000  |
| 1 | 2.085123000  | 2.691931000  | 0.420848000  |
| 1 | 2.018794000  | 1.750469000  | 1.616567000  |
| 8 | 4.528240000  | -3.022830000 | 1.705472000  |
| 1 | 4.733238000  | -2.085398000 | 1.877345000  |
| 1 | 3.571247000  | -3.084573000 | 1.868609000  |
| 8 | 4.811278000  | -0.079591000 | 1.585659000  |
| 1 | 3.835693000  | -0.065138000 | 1.647932000  |
| 1 | 4.920807000  | -0.149834000 | 0.608241000  |
| 8 | 2.001769000  | -0.224258000 | 1.125970000  |
| 1 | 1.871887000  | -1.198349000 | 1.310380000  |
| 1 | 2.078289000  | -0.187757000 | 0.150746000  |
| 8 | 1.599722000  | -2.845690000 | 1.411729000  |
| 1 | 0.638526000  | -2.942450000 | 1.577585000  |
| 1 | 1.682069000  | -2.986788000 | 0.434885000  |
| 8 | -3.592706000 | 2.816807000  | 2.384208000  |
| 1 | -2.690337000 | 3.072211000  | 2.129343000  |
| 1 | -4.124926000 | 2.995526000  | 1.571807000  |
| 8 | -4.840062000 | 0.132847000  | -0.016662000 |
| 1 | -4.188265000 | 0.142200000  | -0.751059000 |
| 1 | -4.304134000 | 0.054999000  | 0.800505000  |
| 8 | -3.183332000 | 0.051301000  | -2.286527000 |
| 1 | -2.233909000 | 0.018918000  | -2.072260000 |
| 1 | -3.401952000 | -0.892546000 | -2.493768000 |
| 8 | -5.340639000 | -2.683263000 | -0.291094000 |
| 1 | -4.940643000 | -2.899659000 | 0.575643000  |
| 1 | -5.404427000 | -1.709380000 | -0.234030000 |
| 8 | -3.455684000 | 2.948552000  | -2.302704000 |
| 1 | -3.487960000 | 1.991926000  | -2.488888000 |
| 1 | -2.508881000 | 3.115177000  | -2.163952000 |
| 8 | -4.018399000 | -2.826685000 | 2.252106000  |
| 1 | -4.076360000 | -1.890338000 | 2.510638000  |
| 1 | -3.077804000 | -2.923068000 | 2.017335000  |
| 8 | -3.493781000 | 0.087045000  | 2.486464000  |
| 1 | -2.530153000 | -0.009647000 | 2.425621000  |
| 1 | -3.603826000 | 1.069352000  | 2.570345000  |
| 8 | -5.084713000 | 2.986185000  | 0.062666000  |
| 1 | -5.230648000 | 2.019892000  | 0.023998000  |
| 1 | -4.544690000 | 3.136038000  | -0.739509000 |
| 8 | -3.646166000 | -2.639390000 | -2.478449000 |
| 1 | -2.791968000 | -3.018610000 | -2.213642000 |
| 1 | -4.236288000 | -2.786622000 | -1.700830000 |
